# Supplementary material for: Field Effect Detection by Light Scattering in the Breast Cancer Risk Determination
Source: Research Square preprint supplement (doi:10.21203/rs.3.rs-2674397/v1), 2023-03-24
Supplement: Supplementary file 1 [file d3a14b5843d1d4e2ca0b6d65.xlsx]

## Sheet: 512
ch2-0-1kHz	ch2-1-10kHz	ch2-10-50kHz	ch2-50-100kHz	ch2-100-150kHz	ch2-150-160kHz	Ventana	quadrant	Edad	Class	ch0: 0-1kHz	ch0: 1-10kHz	ch0: 10-50kHz	ch0: 50-100kHz	ch0: 100-150kHz	ch0: 150-160kHz	ch1: 0-1kHz	ch1: 1-10kHz	ch1: 10-50kHz	ch1: 50-100kHz	ch1: 100-150kHz	ch1: 150-160kHz
0.00468351	0.053055	0.244461	0.309451	0.311039	0.0569465	512	CSII	55	Anormal	0.00457743	0.0530869	0.244628	0.309346	0.31101	0.0569795	0.0058028	0.0527388	0.240118	0.311014	0.314095	0.0560868
0.00440706	0.0530677	0.244597	0.309091	0.311483	0.0569824	512	CSII	25	Normal	0.00441986	0.0531033	0.244698	0.309072	0.311349	0.0569932	0.00510057	0.0527045	0.240824	0.30826	0.316449	0.0564272
0.00412379	0.0487515	0.224989	0.312625	0.336777	0.0538326	512	CSII	42	Anormal	0.0041308	0.049034	0.226215	0.311921	0.335768	0.0539431	0.00416622	0.0416577	0.194072	0.337628	0.353681	0.051485
0.00449195	0.052605	0.242517	0.312181	0.311181	0.0567934	512	CSII	23	Anormal	0.00441668	0.0526957	0.242885	0.311874	0.311061	0.0568056	0.00465221	0.0502335	0.229779	0.326366	0.31395	0.0555023
0.00451178	0.0526929	0.242892	0.312085	0.310797	0.0567696	512	CSII	23	Normal	0.00441925	0.0526927	0.24304	0.311944	0.310857	0.0567754	0.0051644	0.0500369	0.230129	0.327716	0.311703	0.0555426
0.00450764	0.0531158	0.244828	0.309342	0.310795	0.0570285	512	CSII	22	Normal	0.00444562	0.0531091	0.244897	0.309415	0.310717	0.0570245	0.00484932	0.0530971	0.24399	0.309505	0.311967	0.0562662
0.00437972	0.053144	0.244953	0.309072	0.311163	0.0569364	512	CSII	42	Normal	0.0044059	0.0531446	0.244932	0.309076	0.311114	0.0569649	0.00492322	0.0531775	0.243396	0.309116	0.312927	0.0561339
0.00431132	0.0530496	0.244824	0.309599	0.31076	0.0570568	512	CSII	47	Normal	0.00439487	0.0530962	0.244965	0.309439	0.310695	0.0570294	0.0048665	0.0517956	0.242474	0.311804	0.312115	0.056718
0.00459051	0.0531076	0.24491	0.309007	0.311076	0.0569313	512	CSII	52	Normal	0.00466524	0.0531097	0.244948	0.308937	0.311012	0.0569711	0.00586439	0.0532125	0.243379	0.308529	0.312576	0.0561168
0.0043665	0.052908	0.244555	0.30925	0.311166	0.0573572	512	CSII	51	Normal	0.00445592	0.0529397	0.244644	0.30914	0.311093	0.0573315	0.00528207	0.0525696	0.242076	0.305954	0.315808	0.0580644
0.00444311	0.053064	0.24475	0.309767	0.310443	0.0571212	512	CSII	35	Normal	0.00438324	0.0530509	0.244894	0.309752	0.310386	0.0571228	0.00504109	0.0534068	0.245315	0.309938	0.309379	0.0564642
0.00436279	0.0530203	0.244779	0.309813	0.31047	0.0571241	512	CSII	49	Normal	0.00434968	0.0530508	0.244863	0.309695	0.310476	0.057152	0.00509622	0.0532695	0.245171	0.310132	0.309455	0.0564037
0.0043945	0.0530426	0.24485	0.309656	0.310521	0.0571166	512	CSII	34	Anormal	0.00450223	0.0530189	0.24493	0.309409	0.31062	0.0571249	0.00527168	0.0540099	0.244899	0.309721	0.309472	0.0561303
0.00455445	0.0530591	0.244693	0.309489	0.310586	0.0572013	512	CSII	50	Normal	0.00443541	0.053	0.244532	0.309284	0.311035	0.0573001	0.00527368	0.0544385	0.249288	0.309931	0.304955	0.055529
0.0044097	0.0539522	0.248047	0.308743	0.307856	0.0565069	512	CSII	60	Normal	0.00430065	0.053878	0.247614	0.308313	0.308673	0.0567582	0.00568512	0.0506444	0.232456	0.290754	0.337713	0.0628552
0.00450099	0.05301	0.244884	0.309698	0.310389	0.0571002	512	CSII	57	Anormal	0.00458057	0.0530397	0.245011	0.309475	0.310375	0.0571048	0.00522199	0.0527282	0.24446	0.309828	0.310695	0.0566462
0.00443256	0.0529857	0.244683	0.30945	0.310955	0.0570886	512	CSII	47	Anormal	0.00440324	0.0530066	0.244615	0.309236	0.311247	0.0571021	0.00523722	0.0522156	0.240768	0.305837	0.319066	0.0566338
0.00440338	0.0529963	0.244694	0.309614	0.310779	0.0570932	512	CSII	50	Normal	0.00438085	0.0530386	0.244934	0.309573	0.310598	0.0570744	0.0051215	0.0529107	0.24334	0.308953	0.312961	0.0563613
0.00438854	0.0529514	0.244466	0.309168	0.311234	0.0573914	512	CSII	34	Normal	0.00448309	0.0529139	0.244451	0.308933	0.311395	0.0574546	0.00506322	0.0524384	0.241579	0.306103	0.316008	0.0585805
0.0047202	0.0529269	0.24423	0.308954	0.311378	0.0573981	512	CSII	47	Normal	0.00448735	0.0528829	0.244305	0.308805	0.311668	0.0574984	0.00528819	0.0523478	0.241276	0.305327	0.316793	0.0587484
0.00448587	0.0530252	0.244826	0.309594	0.310565	0.057105	512	CSII	24	Normal	0.00440735	0.0530383	0.244952	0.309514	0.310623	0.057083	0.00505388	0.0530579	0.243917	0.309467	0.311628	0.0565056
0.00441685	0.0528642	0.244085	0.308995	0.311746	0.0575082	512	CSII	29	Normal	0.0043846	0.052847	0.244047	0.30874	0.312007	0.0576102	0.00508028	0.0515511	0.238127	0.303291	0.32207	0.0598122
0.00466665	0.0528908	0.244204	0.309111	0.311324	0.0574146	512	CSII	29	Normal	0.00459567	0.052891	0.244206	0.308951	0.31155	0.0574266	0.00520406	0.0521341	0.240701	0.305231	0.317808	0.058726
0.00453322	0.0528583	0.244254	0.309037	0.311556	0.0573811	512	CSII	34	Normal	0.00435711	0.0528722	0.244257	0.308944	0.311749	0.0574423	0.00489865	0.051984	0.240397	0.305177	0.318804	0.0585766
0.0045128	0.0535624	0.244159	0.309982	0.310347	0.0569523	512	CSII	42	Normal	0.00575375	0.0536175	0.243127	0.314047	0.306998	0.0560317	0.00480897	0.0536147	0.243885	0.309733	0.310499	0.0569959
0.00476351	0.0532241	0.243906	0.310007	0.310787	0.0568985	512	CSII	34	Normal	0.00560673	0.0532613	0.242215	0.31802	0.305275	0.0554241	0.00444427	0.0533065	0.243726	0.309975	0.311194	0.056931
0.00459883	0.0532126	0.244039	0.310084	0.310717	0.0568944	512	CSII	34	Normal	0.00555038	0.0532836	0.241885	0.319565	0.304268	0.0552063	0.00455336	0.0532602	0.243793	0.309931	0.31111	0.0568968
0.00442551	0.0532407	0.244281	0.309734	0.310892	0.0569274	512	CSIE	34	Normal	0.00484366	0.0536509	0.243	0.317513	0.305208	0.0554576	0.00436654	0.0530687	0.243729	0.309839	0.311499	0.0570206
0.00451074	0.0530595	0.244431	0.309466	0.311134	0.0570184	512	CSID	55	Anormal	0.00437915	0.0531404	0.244678	0.309422	0.311014	0.0569789	0.00476636	0.0531076	0.241993	0.31066	0.3129	0.0562893
0.00472529	0.053038	0.244412	0.309105	0.311313	0.0570325	512	CSID	25	Normal	0.00463428	0.053081	0.244593	0.309071	0.311216	0.0570173	0.00519414	0.0528645	0.241334	0.307732	0.315917	0.0566847
0.00424023	0.0483271	0.222734	0.317102	0.33552	0.0533369	512	CSID	42	Anormal	0.00406161	0.0486382	0.224304	0.316265	0.334351	0.0535528	0.00449238	0.0411172	0.190886	0.344563	0.351115	0.0505873
0.00451407	0.0525818	0.242498	0.312145	0.311289	0.056733	512	CSID	23	Anormal	0.00429445	0.0526759	0.242779	0.311938	0.311267	0.056798	0.0050105	0.0504139	0.229683	0.32609	0.313903	0.0553443
0.00437264	0.0527415	0.2432	0.312055	0.310526	0.0568177	512	CSID	23	Normal	0.00445814	0.0527662	0.243288	0.311882	0.310492	0.0568277	0.00488577	0.0504591	0.231016	0.329593	0.309464	0.0549972
0.00445552	0.0530746	0.24488	0.309391	0.310841	0.0569658	512	CSID	22	Normal	0.00463603	0.0531363	0.244859	0.309313	0.310705	0.0569752	0.00490267	0.053242	0.244231	0.309187	0.31187	0.0562172
0.00457674	0.0531491	0.244868	0.309003	0.311084	0.0569601	512	CSID	42	Normal	0.00448569	0.0531431	0.244951	0.309082	0.310978	0.0569951	0.00494204	0.0530462	0.241201	0.308153	0.316609	0.0558227
0.00450155	0.0531325	0.244805	0.309432	0.310757	0.0569852	512	CSID	47	Normal	0.00436159	0.0531063	0.244899	0.309355	0.310804	0.0570792	0.00494921	0.0533054	0.242327	0.308817	0.314296	0.0559945
0.004446	0.0530976	0.244911	0.308966	0.31129	0.0569236	512	CSID	52	Normal	0.00466768	0.0531112	0.244905	0.308879	0.31112	0.0569584	0.00565053	0.0533226	0.242535	0.308051	0.314146	0.0560056
0.00444706	0.0530224	0.244867	0.309733	0.31036	0.0571464	512	CSID	51	Normal	0.00442782	0.0530441	0.24499	0.309591	0.310373	0.0571618	0.00497558	0.0531882	0.24486	0.309691	0.310319	0.0565246
0.00451571	0.0530407	0.244777	0.309762	0.310357	0.0571235	512	CSID	35	Normal	0.0044254	0.0530782	0.244894	0.309727	0.310366	0.0571028	0.00495353	0.0535443	0.245905	0.310139	0.308699	0.0562767
0.00498416	0.0530252	0.244653	0.309543	0.310302	0.0570854	512	CSID	49	Normal	0.00494728	0.0530391	0.244755	0.309414	0.310367	0.0570887	0.0055961	0.0533231	0.2444	0.30972	0.310185	0.0562712
0.00442982	0.0530614	0.244855	0.309599	0.310549	0.0571147	512	CSID	34	Anormal	0.00438022	0.0530218	0.244872	0.309455	0.310745	0.0571212	0.00513318	0.0541173	0.243636	0.309647	0.311046	0.0559574
0.00447736	0.0530123	0.244739	0.309745	0.310453	0.0571506	512	CSID	50	Normal	0.00450039	0.0530258	0.244684	0.309563	0.310635	0.0571772	0.00628194	0.0555848	0.251208	0.308968	0.302415	0.0546069
0.00486015	0.0533299	0.245731	0.30923	0.309477	0.0569367	512	CSID	60	Normal	0.00454778	0.053231	0.245432	0.308984	0.310276	0.0571031	0.00603533	0.0541587	0.247761	0.310306	0.305876	0.0553229
0.00480043	0.0529503	0.244892	0.30959	0.310325	0.0570594	512	CSID	57	Anormal	0.00478405	0.0529846	0.244875	0.309413	0.310482	0.057079	0.00547772	0.053049	0.244569	0.309448	0.310263	0.0566012
0.00474532	0.0529848	0.24462	0.309342	0.310804	0.0570882	512	CSID	47	Anormal	0.00442579	0.0530196	0.244674	0.309305	0.311123	0.0570678	0.00577383	0.0528673	0.241824	0.305744	0.316797	0.0566277
0.00459644	0.0529886	0.244608	0.309473	0.310853	0.0570604	512	CSID	50	Normal	0.00433137	0.053037	0.244904	0.309471	0.310751	0.0571069	0.0055803	0.0526493	0.242081	0.307165	0.31563	0.0565608
0.00473503	0.0528984	0.244287	0.308928	0.31135	0.057417	512	CSID	34	Normal	0.0045167	0.0528907	0.244294	0.308661	0.311753	0.0575345	0.00528471	0.05217	0.240238	0.30321	0.319434	0.0594289
0.00504144	0.0529129	0.244214	0.308887	0.311177	0.0573787	512	CSID	47	Normal	0.00489737	0.0529038	0.244185	0.308637	0.311553	0.0574564	0.00555678	0.0523773	0.240364	0.304107	0.31823	0.059035
0.00441714	0.0530161	0.244811	0.309599	0.310608	0.0571435	512	CSID	24	Normal	0.00441754	0.0530162	0.244963	0.309372	0.31073	0.057088	0.00490388	0.052985	0.24373	0.309174	0.312281	0.0565501
0.00452431	0.0529003	0.244261	0.309006	0.31147	0.0574585	512	CSID	29	Normal	0.0046607	0.0528548	0.24419	0.308777	0.311671	0.0574879	0.00552173	0.0521032	0.239665	0.304363	0.319061	0.05908
0.00439809	0.0528935	0.244212	0.309173	0.31149	0.0574444	512	CSID	29	Normal	0.00433869	0.0529037	0.244295	0.308984	0.311638	0.0574726	0.00482451	0.0521756	0.240637	0.305114	0.318219	0.0588338
0.00442953	0.0529133	0.244175	0.308936	0.31171	0.0574536	512	CSID	34	Normal	0.00435462	0.0528625	0.244208	0.30873	0.311929	0.0575575	0.00505568	0.0518865	0.239743	0.304244	0.319742	0.0591745
0.0044563	0.0535664	0.244071	0.31006	0.310337	0.057011	512	CSID	42	Normal	0.00552161	0.0535237	0.242779	0.315125	0.306717	0.0559305	0.00465743	0.0536909	0.243765	0.309802	0.310608	0.0569835
0.00444201	0.053217	0.244194	0.309912	0.31085	0.0569218	512	CSID	34	Normal	0.00483999	0.053649	0.243612	0.317028	0.305118	0.0554358	0.0044366	0.0532604	0.243979	0.30976	0.311145	0.0569368
0.00464143	0.0530302	0.244546	0.309427	0.311021	0.0569553	512	CSEI	55	Anormal	0.00445443	0.053089	0.244611	0.30958	0.310956	0.0569462	0.00539052	0.0530613	0.242697	0.310916	0.311439	0.0562112
0.00441685	0.0531571	0.24485	0.309264	0.310998	0.0569332	512	CSEI	25	Normal	0.00450718	0.0532245	0.244898	0.309217	0.310851	0.0569303	0.0050599	0.0529998	0.243969	0.311022	0.310175	0.0564569
0.00418805	0.0485465	0.223758	0.313261	0.337761	0.0536512	512	CSEI	42	Anormal	0.00405425	0.0488564	0.225195	0.312545	0.336645	0.0537897	0.00453191	0.040596	0.189733	0.33905	0.357362	0.05155
0.0046103	0.0525723	0.242303	0.312277	0.311239	0.056759	512	CSEI	23	Anormal	0.00456971	0.0526796	0.242521	0.312081	0.311186	0.0567429	0.00514918	0.0502342	0.229543	0.325443	0.314507	0.0556484
0.00466919	0.0526988	0.242851	0.312053	0.310747	0.0567591	512	CSEI	23	Normal	0.0043517	0.0527322	0.243179	0.311917	0.310789	0.0568037	0.00532932	0.0504561	0.231823	0.3265	0.310643	0.0555919
0.00445147	0.0530771	0.244881	0.309373	0.310794	0.0570327	512	CSEI	22	Normal	0.00448838	0.0530653	0.244889	0.309392	0.310727	0.0570453	0.0049795	0.0530812	0.243984	0.309552	0.311806	0.0562606
0.00438089	0.0531055	0.244907	0.309222	0.311083	0.0569264	512	CSEI	42	Normal	0.00443425	0.053114	0.244877	0.309237	0.310979	0.0569879	0.00479467	0.0531297	0.243461	0.309186	0.312875	0.0562435
0.00447442	0.0530541	0.24473	0.30952	0.310853	0.0569891	512	CSEI	47	Normal	0.00449157	0.0531177	0.244963	0.309347	0.310708	0.0569874	0.00508885	0.053523	0.249896	0.310906	0.305235	0.0550642
0.00444966	0.0530703	0.245004	0.309096	0.311074	0.0569499	512	CSEI	52	Normal	0.00455004	0.0530945	0.244991	0.309053	0.310981	0.0569714	0.00512704	0.0537068	0.242693	0.308502	0.31346	0.0561468
0.0045504	0.0529042	0.244453	0.309219	0.311188	0.057302	512	CSEI	51	Normal	0.00496104	0.052903	0.244471	0.309054	0.310961	0.0572746	0.00607836	0.0524431	0.241191	0.304519	0.317097	0.0584614
0.00441691	0.0530467	0.24483	0.309762	0.310415	0.0570943	512	CSEI	35	Normal	0.00439419	0.053065	0.244877	0.309671	0.310434	0.0571283	0.00495098	0.0535134	0.245761	0.31038	0.308577	0.0563415
0.00495135	0.0530283	0.244658	0.309624	0.310237	0.0570856	512	CSEI	49	Normal	0.0043789	0.0530453	0.244894	0.309613	0.310511	0.0571286	0.00612501	0.0532547	0.244652	0.309606	0.309691	0.0561962
0.00437434	0.0530694	0.244743	0.309684	0.310594	0.0571268	512	CSEI	34	Anormal	0.00441942	0.0530196	0.244869	0.309526	0.310662	0.0571076	0.0051182	0.0538983	0.244983	0.30977	0.309612	0.0561261
0.00451708	0.0529991	0.244598	0.309735	0.31054	0.0571763	512	CSEI	50	Normal	0.00436351	0.0530201	0.244606	0.309627	0.310741	0.0572328	0.00512948	0.0548466	0.250171	0.309505	0.304417	0.0552943
0.00467925	0.0540153	0.248204	0.309009	0.307154	0.0564265	512	CSEI	60	Normal	0.00433649	0.053616	0.246911	0.30873	0.309112	0.0568528	0.00499026	0.053327	0.246331	0.311085	0.307617	0.0561976
0.00455195	0.0530303	0.244868	0.309653	0.310389	0.057104	512	CSEI	57	Anormal	0.00451406	0.0530498	0.244931	0.309458	0.310517	0.0571283	0.00526162	0.0527349	0.244451	0.309774	0.310679	0.0566872
0.0050434	0.0529628	0.244477	0.30924	0.310789	0.057098	512	CSEI	47	Anormal	0.00468808	0.0529654	0.244681	0.309178	0.311008	0.0571031	0.00604661	0.0524404	0.241581	0.305808	0.317458	0.0563999
0.00447966	0.0529663	0.244612	0.30954	0.310904	0.0570922	512	CSEI	50	Normal	0.00451539	0.0530388	0.244787	0.309406	0.310764	0.0570837	0.00526591	0.0524719	0.240789	0.306594	0.318029	0.0566256
0.0046555	0.0529207	0.244324	0.309066	0.311222	0.0574216	512	CSEI	34	Normal	0.0049121	0.0528917	0.244337	0.308794	0.311291	0.0574105	0.00557727	0.052244	0.240952	0.30466	0.317324	0.0590398
0.00484656	0.0528897	0.244209	0.30892	0.31132	0.0574345	512	CSEI	47	Normal	0.00447842	0.0528847	0.244348	0.308743	0.311632	0.057539	0.00597673	0.0519825	0.239579	0.303068	0.319517	0.0597384
0.00440617	0.0530238	0.244839	0.309684	0.310549	0.0570871	512	CSEI	24	Normal	0.00441548	0.0530505	0.244953	0.309427	0.310645	0.0571117	0.00499614	0.0532212	0.244076	0.309754	0.311088	0.0564662
0.0045958	0.0527876	0.243972	0.30868	0.312021	0.0575705	512	CSEI	29	Normal	0.0044705	0.0527833	0.243888	0.308521	0.312325	0.0576627	0.00545294	0.0511848	0.235867	0.301	0.326258	0.0602731
0.00499779	0.0528748	0.244157	0.309066	0.311105	0.0573863	512	CSEI	29	Normal	0.0048636	0.0528881	0.244274	0.308913	0.311316	0.0573795	0.00568835	0.0522416	0.241113	0.305455	0.316694	0.0585916
0.00437907	0.0529144	0.244198	0.309077	0.311612	0.0574205	512	CSEI	34	Normal	0.00435386	0.0528894	0.24421	0.308843	0.311847	0.0575039	0.00484637	0.0519957	0.240212	0.305013	0.318992	0.0587855
0.00458082	0.0535746	0.244061	0.310068	0.310277	0.0569559	512	CSEI	42	Normal	0.00550787	0.0537278	0.243283	0.314173	0.306917	0.0559703	0.00473481	0.0537082	0.243873	0.309702	0.310515	0.0569857
0.00461148	0.0532278	0.24401	0.310039	0.310775	0.0568964	512	CSEI	34	Normal	0.00553713	0.0535842	0.242929	0.317225	0.304958	0.0554075	0.00440732	0.0532647	0.243865	0.309891	0.311192	0.0569362
0.00451462	0.0530651	0.244521	0.309419	0.311128	0.0569792	512	CSED	55	Anormal	0.0045104	0.0531009	0.244665	0.309439	0.310908	0.0569933	0.00504816	0.0532832	0.242695	0.310882	0.3116	0.0561576
0.00464546	0.0530331	0.244523	0.309159	0.311255	0.0570103	512	CSED	25	Normal	0.00433498	0.053061	0.244768	0.309232	0.311196	0.0570251	0.0055896	0.0529946	0.241387	0.30791	0.315411	0.056426
0.00452805	0.0484885	0.223587	0.316366	0.334846	0.0533925	512	CSED	42	Anormal	0.00426709	0.0487779	0.22495	0.31577	0.333801	0.0535534	0.00474673	0.0409739	0.190145	0.34451	0.351953	0.0504959
0.00455966	0.0526058	0.242295	0.312228	0.311365	0.0567221	512	CSED	23	Anormal	0.00433747	0.0526998	0.242779	0.311954	0.311216	0.0567732	0.00500824	0.0506325	0.230205	0.325413	0.313745	0.0553864
0.00436458	0.0527575	0.243106	0.31219	0.310534	0.0567749	512	CSED	23	Normal	0.00435163	0.0527355	0.243254	0.312055	0.310536	0.0568127	0.00466114	0.0505714	0.231392	0.329496	0.309267	0.0550154
0.00455718	0.0530608	0.244827	0.309314	0.310858	0.0570004	512	CSED	22	Normal	0.00436467	0.0531267	0.244929	0.309382	0.310807	0.0570016	0.00491547	0.0532375	0.243828	0.308857	0.312686	0.0561665
0.00455494	0.0531196	0.244828	0.309136	0.311041	0.0569719	512	CSED	42	Normal	0.00435201	0.0531673	0.244952	0.309063	0.311079	0.05701	0.00518208	0.0528712	0.243502	0.309542	0.312647	0.0559912
0.00446393	0.0531192	0.244801	0.309415	0.310829	0.0569829	512	CSED	47	Normal	0.00444014	0.053124	0.244927	0.309368	0.310703	0.0570515	0.00495901	0.053359	0.244027	0.309457	0.311637	0.0562004
0.00446885	0.0530905	0.244853	0.309041	0.311253	0.0569427	512	CSED	52	Normal	0.00444391	0.0530984	0.244961	0.309034	0.311134	0.0569716	0.00507193	0.053395	0.243428	0.30831	0.313265	0.0561897
0.00458849	0.0530086	0.244871	0.309658	0.310329	0.0571187	512	CSED	51	Normal	0.00442792	0.053019	0.244938	0.309691	0.310373	0.0571348	0.00507893	0.0534939	0.245642	0.309442	0.30943	0.0564366
0.00454769	0.0530666	0.244757	0.309744	0.31038	0.0570985	512	CSED	35	Normal	0.0044192	0.0530805	0.244837	0.309723	0.310413	0.0571329	0.00512263	0.053572	0.245615	0.309976	0.308921	0.0562674
0.00445291	0.0530714	0.244803	0.309659	0.310502	0.0570954	512	CSED	49	Normal	0.0044322	0.0530671	0.244846	0.309593	0.310538	0.0571132	0.00522746	0.0532538	0.244561	0.309787	0.310376	0.0563203
0.00442641	0.0530343	0.244848	0.309638	0.31058	0.0570678	512	CSED	34	Anormal	0.00441555	0.0530232	0.244873	0.309522	0.310655	0.0571065	0.00535048	0.0538976	0.245295	0.309655	0.30918	0.056153
0.00451129	0.0530283	0.244744	0.309618	0.310558	0.057123	512	CSED	50	Normal	0.00440055	0.0530311	0.244735	0.309509	0.310735	0.0571851	0.00545095	0.0546497	0.248844	0.308842	0.30613	0.0554836
0.00439878	0.0533444	0.245812	0.309312	0.309708	0.0569778	512	CSED	60	Normal	0.00431421	0.0532476	0.245491	0.308966	0.310426	0.0571351	0.00490516	0.0539727	0.247762	0.310264	0.306796	0.0557786
0.00494027	0.0529715	0.244896	0.309457	0.310345	0.0570208	512	CSED	57	Anormal	0.00471356	0.0529863	0.24501	0.309281	0.3106	0.0570303	0.00547123	0.0527113	0.244221	0.309279	0.311303	0.0566064
0.00463574	0.0530171	0.244603	0.309384	0.310833	0.0571203	512	CSED	47	Anormal	0.0045823	0.0529856	0.244726	0.309224	0.311013	0.057094	0.00534615	0.0529472	0.242515	0.306586	0.315632	0.0565972
0.00451957	0.0530432	0.24467	0.309543	0.310735	0.0570832	512	CSED	50	Normal	0.00438903	0.0530594	0.244768	0.309455	0.310828	0.0570989	0.00506787	0.0527674	0.24263	0.307721	0.314891	0.0565848
0.0046039	0.0528904	0.244452	0.308955	0.311327	0.0573789	512	CSED	34	Normal	0.00477299	0.0528945	0.244301	0.308685	0.311541	0.05743	0.005504	0.0526983	0.241757	0.304609	0.316448	0.0586295
0.00460295	0.0529153	0.244251	0.309017	0.311391	0.057433	512	CSED	47	Normal	0.00452419	0.0528785	0.244275	0.308762	0.311705	0.0574889	0.00501903	0.0524756	0.240568	0.304283	0.318275	0.0591199
0.00454655	0.0530425	0.244854	0.309442	0.310596	0.0571086	512	CSED	24	Normal	0.00440185	0.0530131	0.244919	0.309306	0.310842	0.0571119	0.00527843	0.0532375	0.243145	0.30858	0.312929	0.0564448
0.00463685	0.0528207	0.244193	0.308748	0.311729	0.057485	512	CSED	29	Normal	0.0045263	0.0528164	0.244073	0.308583	0.312096	0.0575581	0.00546195	0.0520881	0.23829	0.301498	0.322625	0.0598483
0.00452139	0.0528706	0.24419	0.309166	0.311405	0.0574623	512	CSED	29	Normal	0.00452449	0.0528512	0.244175	0.308915	0.31164	0.0575216	0.0047462	0.0514838	0.237206	0.301843	0.324462	0.060212
0.00463188	0.0528665	0.244047	0.308938	0.31169	0.0574648	512	CSED	34	Normal	0.00447222	0.0528523	0.244127	0.30871	0.311956	0.0575269	0.00495456	0.0520491	0.239674	0.303694	0.320239	0.0591967
0.00496421	0.0535593	0.243978	0.30988	0.310212	0.0569139	512	CSED	42	Normal	0.00653281	0.0539281	0.242614	0.31573	0.305205	0.0555407	0.00490505	0.0536237	0.243884	0.309722	0.310408	0.0569648
0.00447137	0.0532621	0.244177	0.310024	0.310645	0.0569297	512	CSED	34	Normal	0.00503256	0.0536498	0.243465	0.31749	0.304671	0.0553864	0.00449687	0.053276	0.24398	0.30988	0.310916	0.0569389
0.00443439	0.0530138	0.244549	0.309567	0.31107	0.0569823	512	CIII	55	Anormal	0.00433451	0.0530792	0.244668	0.309447	0.311072	0.0570208	0.00510374	0.0527627	0.240278	0.311899	0.313691	0.0560697
0.00418285	0.0491709	0.226983	0.31099	0.334435	0.0551507	512	CIII	25	Normal	0.00406327	0.0494567	0.228169	0.31049	0.333398	0.0552595	0.00421753	0.0420443	0.197433	0.335731	0.35	0.0527764
0.00410223	0.0488858	0.225794	0.312552	0.335852	0.0538504	512	CIII	42	Anormal	0.00412699	0.0492128	0.226885	0.311716	0.335124	0.0538886	0.00404421	0.0424872	0.197872	0.335225	0.351392	0.0514919
0.00449159	0.0526168	0.242565	0.312048	0.311263	0.0567705	512	CIII	23	Anormal	0.00437857	0.0527237	0.242931	0.311679	0.311218	0.0568018	0.00462694	0.0506816	0.230856	0.326962	0.312164	0.0551528
0.00434814	0.0527438	0.243259	0.311523	0.311004	0.0568287	512	CIII	23	Normal	0.00431427	0.0527564	0.243246	0.311608	0.310984	0.0568121	0.00486395	0.049928	0.231542	0.327033	0.311377	0.0556366
0.00452512	0.0531422	0.244873	0.309384	0.310702	0.0569884	512	CIII	22	Normal	0.00447653	0.0531372	0.244914	0.309433	0.310604	0.0570438	0.00507805	0.0532006	0.243607	0.309183	0.312386	0.0562381
0.00443984	0.053107	0.244953	0.308941	0.31131	0.0568945	512	CIII	42	Normal	0.00436707	0.0531216	0.245014	0.308919	0.311238	0.0569803	0.00492482	0.0530983	0.241484	0.308201	0.316113	0.0559153
0.00438951	0.0530977	0.244809	0.309421	0.310887	0.0570192	512	CIII	47	Normal	0.00430985	0.0530925	0.244881	0.309428	0.310854	0.0570427	0.0048693	0.0533622	0.243322	0.3098	0.312111	0.0561877
0.00454581	0.0531122	0.244873	0.309125	0.311033	0.0569418	512	CIII	52	Normal	0.00458558	0.0530893	0.244885	0.309203	0.310888	0.0569785	0.00559715	0.0532908	0.243185	0.308771	0.312684	0.0561506
0.00446204	0.0529336	0.244572	0.30931	0.311094	0.0572361	512	CIII	51	Normal	0.00436978	0.0529556	0.244714	0.309394	0.310974	0.0572137	0.00475426	0.0527365	0.242902	0.306883	0.315029	0.057447
0.00457371	0.0530211	0.244738	0.309729	0.310381	0.0571367	512	CIII	35	Normal	0.0045624	0.0530544	0.244736	0.309731	0.310378	0.0571183	0.00508103	0.0534178	0.245433	0.310171	0.308954	0.0564931
0.0044222	0.0530346	0.244789	0.309771	0.310425	0.0571319	512	CIII	49	Normal	0.00438078	0.0530466	0.244903	0.309759	0.310384	0.0571156	0.00496057	0.0532105	0.245745	0.31047	0.308779	0.0563868
0.00455216	0.0530312	0.244742	0.309638	0.31052	0.0571089	512	CIII	34	Anormal	0.00466591	0.0530306	0.244748	0.30943	0.310608	0.0571182	0.00536932	0.0536955	0.245237	0.309908	0.309343	0.0560015
0.00468336	0.0531192	0.244833	0.30946	0.310325	0.057141	512	CIII	50	Normal	0.00482325	0.0530762	0.244715	0.309244	0.310547	0.0571846	0.00589714	0.0548913	0.250272	0.310401	0.30272	0.0551608
0.00442356	0.0544638	0.2499	0.308905	0.305734	0.0560625	512	CIII	60	Normal	0.00429152	0.053795	0.247748	0.308589	0.308522	0.056619	0.00511494	0.052823	0.244954	0.311508	0.308719	0.0564834
0.00446797	0.0529503	0.24471	0.309576	0.310766	0.0571337	512	CIII	57	Anormal	0.00462557	0.0530024	0.244721	0.309412	0.310688	0.0571414	0.00540607	0.052733	0.242671	0.30866	0.313681	0.0564437
0.00471364	0.0529682	0.244573	0.309406	0.310861	0.057085	512	CIII	47	Anormal	0.00438752	0.0530257	0.24468	0.309199	0.311191	0.0571321	0.00555273	0.0521694	0.240179	0.305325	0.320055	0.0564941
0.00446103	0.0529963	0.244685	0.309639	0.310692	0.0571154	512	CIII	50	Normal	0.00450188	0.0530382	0.244882	0.309456	0.310637	0.0570866	0.00548862	0.0529359	0.243261	0.308757	0.31292	0.0562816
0.0045762	0.0529242	0.244471	0.309282	0.311027	0.0573222	512	CIII	34	Normal	0.00444136	0.0529404	0.244483	0.309184	0.31119	0.0573734	0.00500422	0.0525885	0.242763	0.307464	0.313788	0.0581281
0.00452946	0.0529264	0.244331	0.30918	0.311268	0.0573447	512	CIII	47	Normal	0.00470704	0.0529071	0.244277	0.308852	0.311453	0.0574246	0.00533555	0.0523972	0.241396	0.305686	0.316485	0.0584201
0.00463493	0.0530063	0.244789	0.309592	0.310482	0.0570717	512	CIII	24	Normal	0.00458825	0.0530044	0.244934	0.309492	0.310498	0.0570867	0.00505143	0.0530789	0.24447	0.310198	0.310395	0.0564041
0.00447117	0.0528623	0.24423	0.309191	0.311418	0.0574384	512	CIII	29	Normal	0.00448207	0.0528727	0.244229	0.308994	0.311544	0.0575053	0.00495126	0.0521371	0.240468	0.305719	0.317952	0.0585783
0.00457215	0.0528942	0.244294	0.30914	0.311299	0.057394	512	CIII	29	Normal	0.0044946	0.052927	0.244247	0.308984	0.311495	0.0574693	0.00555427	0.0521449	0.240443	0.305062	0.317755	0.0588206
0.00455191	0.052918	0.244236	0.30923	0.311265	0.0574078	512	CIII	34	Normal	0.00444822	0.0528646	0.244293	0.309071	0.311523	0.0574373	0.00495538	0.0518466	0.239029	0.304589	0.320527	0.0588796
0.00462267	0.0535992	0.244117	0.309962	0.310242	0.0569543	512	CIII	42	Normal	0.00557445	0.0536878	0.243149	0.314258	0.306927	0.056	0.0048748	0.0536627	0.243762	0.309704	0.3105	0.0569904
0.00439434	0.0532256	0.244035	0.310147	0.310834	0.0569259	512	CIII	34	Normal	0.00494378	0.0532036	0.242176	0.318053	0.305704	0.0556142	0.00448628	0.0532734	0.243874	0.309949	0.311078	0.0569045
0.00448292	0.053046	0.244444	0.309488	0.311174	0.056981	512	CIID	55	Anormal	0.00435749	0.0530977	0.244664	0.309446	0.311028	0.0570203	0.00504683	0.0530673	0.241899	0.310948	0.312523	0.0562417
0.00455326	0.0532363	0.244767	0.309233	0.310867	0.0569458	512	CIID	25	Normal	0.00453481	0.0532522	0.244946	0.309259	0.310691	0.0569483	0.00469372	0.052794	0.243044	0.311669	0.311065	0.0564645
0.00439023	0.048369	0.222816	0.317504	0.334939	0.0532514	512	CIID	42	Anormal	0.0046584	0.0488987	0.225513	0.315558	0.332975	0.0535195	0.00477704	0.0397761	0.186467	0.350753	0.35171	0.0495933
0.0045741	0.0525747	0.242366	0.312293	0.311241	0.0567242	512	CIID	23	Anormal	0.00440333	0.0527034	0.242651	0.311973	0.311302	0.0567473	0.00506278	0.0495836	0.225184	0.32803	0.317312	0.0554683
0.00437768	0.0526333	0.242698	0.31251	0.31072	0.0568027	512	CIID	23	Normal	0.00433301	0.0526972	0.242812	0.31252	0.310627	0.0567504	0.00483107	0.0497046	0.228809	0.32967	0.311855	0.0555157
0.00440163	0.0530728	0.244891	0.30941	0.310848	0.0569828	512	CIID	22	Normal	0.0043844	0.0531399	0.244965	0.309335	0.310767	0.0570181	0.00504907	0.0532261	0.242618	0.30911	0.313785	0.055932
0.00441433	0.0531084	0.24489	0.309094	0.311194	0.0569365	512	CIID	42	Normal	0.00440146	0.0531349	0.244934	0.309043	0.311134	0.0569662	0.00488625	0.0529783	0.241236	0.308362	0.316607	0.0557084
0.00454795	0.0530977	0.244814	0.309345	0.310797	0.057015	512	CIID	47	Normal	0.00436012	0.0531027	0.244867	0.309442	0.310815	0.0570341	0.00538406	0.0533014	0.243235	0.309109	0.312436	0.0561777
0.00461333	0.0531155	0.244887	0.308851	0.31125	0.0569249	512	CIID	52	Normal	0.00461374	0.0531327	0.244965	0.308849	0.311117	0.0569698	0.00553176	0.0533318	0.242783	0.307893	0.313946	0.0561983
0.00474989	0.0529999	0.244783	0.309615	0.310325	0.0571131	512	CIID	51	Normal	0.0044279	0.053022	0.244938	0.309624	0.31044	0.0571412	0.00582843	0.0533184	0.244026	0.309584	0.310637	0.0561703
0.00446285	0.0530488	0.244775	0.3098	0.310373	0.0571144	512	CIID	35	Normal	0.00438511	0.0530542	0.244877	0.309757	0.310412	0.057097	0.00502602	0.0535978	0.245389	0.31022	0.308971	0.0563243
0.00451819	0.0530508	0.244779	0.309714	0.310427	0.0570968	512	CIID	49	Normal	0.00435711	0.0530603	0.244861	0.309639	0.310576	0.0571009	0.00517339	0.0532673	0.244853	0.310125	0.309838	0.0562614
0.00439687	0.0530443	0.244854	0.309554	0.310629	0.0571179	512	CIID	34	Anormal	0.00434409	0.0530471	0.244896	0.309526	0.310694	0.0571067	0.00499499	0.0537717	0.244367	0.309496	0.310744	0.0561966
0.00452304	0.0530082	0.244657	0.309681	0.310564	0.0571451	512	CIID	50	Normal	0.00438602	0.0530086	0.244698	0.309524	0.310771	0.0572004	0.00523792	0.0549691	0.248831	0.309535	0.305542	0.0552239
0.00455452	0.0535093	0.246318	0.309406	0.308944	0.0567972	512	CIID	60	Normal	0.00439861	0.0532981	0.24576	0.309022	0.310035	0.0570657	0.00508207	0.0536527	0.246845	0.310519	0.307443	0.0559573
0.00480368	0.0529689	0.244844	0.309587	0.310347	0.0570423	512	CIID	57	Anormal	0.00479994	0.0529792	0.244977	0.309295	0.310451	0.057094	0.00562762	0.0528353	0.244519	0.309888	0.310037	0.056601
0.00468312	0.053019	0.244525	0.30941	0.310833	0.0571182	512	CIID	47	Anormal	0.00479602	0.0530197	0.244502	0.309173	0.311004	0.0571367	0.00563771	0.0522418	0.239481	0.304684	0.32133	0.0563765
0.00447504	0.0529699	0.244703	0.309535	0.310806	0.0571005	512	CIID	50	Normal	0.00439493	0.0530414	0.244834	0.309484	0.310733	0.0571097	0.00544764	0.0526679	0.242593	0.307996	0.314485	0.0565056
0.00484919	0.0528856	0.244208	0.308903	0.31132	0.057467	512	CIID	34	Normal	0.00453082	0.0528685	0.244326	0.308669	0.311713	0.0575247	0.00569907	0.0517312	0.23786	0.301506	0.322948	0.0601374
0.0047283	0.0529044	0.244354	0.309057	0.311198	0.0573614	512	CIID	47	Normal	0.00461609	0.0528849	0.244375	0.308847	0.311474	0.0574329	0.00513928	0.0519344	0.238159	0.302737	0.32223	0.0596182
0.00455749	0.0530183	0.244765	0.30957	0.310586	0.0570813	512	CIID	24	Normal	0.00441625	0.0530261	0.244805	0.309456	0.310767	0.0571321	0.00513163	0.0531046	0.243557	0.309357	0.312009	0.0564827
0.00448943	0.0529003	0.244208	0.308888	0.311608	0.0575089	512	CIID	29	Normal	0.00438524	0.0528251	0.244213	0.308736	0.311914	0.0575645	0.00477579	0.051371	0.236941	0.302125	0.324603	0.0601627
0.00447941	0.0528879	0.244082	0.308915	0.311747	0.0574876	512	CIID	29	Normal	0.00450983	0.0529033	0.244281	0.309033	0.311438	0.0574507	0.00578788	0.0511367	0.233148	0.299482	0.330277	0.0602975
0.00444519	0.0528734	0.244206	0.309169	0.31151	0.057409	512	CIID	34	Normal	0.00430394	0.0528845	0.244299	0.308949	0.311752	0.0574541	0.00488561	0.0520275	0.239549	0.30488	0.319995	0.0585114
0.00482651	0.0536365	0.243975	0.309933	0.310214	0.0569306	512	CIID	42	Normal	0.00527197	0.0536879	0.243619	0.31424	0.306782	0.0559883	0.004839	0.0536691	0.243786	0.309774	0.310471	0.0569639
0.00449912	0.0530332	0.244523	0.309426	0.311123	0.0570069	512	CIEI		Anormal	0.00437885	0.0530737	0.244696	0.309464	0.311004	0.0570148	0.00507155	0.0529405	0.242079	0.310993	0.312432	0.0562453
0.00453288	0.0530489	0.244498	0.30888	0.311659	0.0570238	512	CIEI		Normal	0.00454719	0.0530971	0.244643	0.309136	0.311225	0.0569804	0.00509644	0.0525602	0.240596	0.308232	0.316894	0.0563868
0.00416225	0.0488973	0.225721	0.312386	0.335938	0.053917	512	CIEI		Anormal	0.0041295	0.0492821	0.227292	0.311642	0.334525	0.0540679	0.00422785	0.0413219	0.193027	0.343249	0.350463	0.0504109
0.00439665	0.0525973	0.242385	0.31239	0.311238	0.0567583	512	CIEI		Anormal	0.0043102	0.0526847	0.24279	0.312058	0.311148	0.0567581	0.00468956	0.0496882	0.227411	0.327328	0.315872	0.055624
0.00434117	0.0526804	0.242695	0.312298	0.310975	0.056742	512	CIEI		Normal	0.00434507	0.0527119	0.242984	0.312061	0.310865	0.0567686	0.00470996	0.0499707	0.22751	0.332053	0.311061	0.055097
0.00441302	0.0530647	0.24496	0.309438	0.310729	0.0570079	512	CIEI		Normal	0.0044185	0.0530911	0.244987	0.309434	0.310643	0.0570267	0.00494941	0.0531218	0.2432	0.309276	0.313091	0.0560849
0.00455312	0.0530949	0.244839	0.309077	0.311148	0.0569274	512	CIEI		Normal	0.00463634	0.0531166	0.244877	0.309039	0.311022	0.0569589	0.00526363	0.0532531	0.242549	0.308733	0.313835	0.0560783
0.00452821	0.0530169	0.244716	0.309544	0.310727	0.0570849	512	CIEI		Normal	0.00444327	0.0531201	0.244937	0.309356	0.310745	0.0570159	0.00474121	0.0521568	0.242241	0.311388	0.312612	0.0565855
0.00446054	0.0530805	0.244927	0.309148	0.311019	0.0570005	512	CIEI		Normal	0.00443085	0.0530953	0.244948	0.309144	0.311001	0.0570125	0.00497588	0.0531254	0.243869	0.309217	0.31224	0.0562577
0.00447898	0.0528936	0.24448	0.309051	0.311346	0.0573722	512	CIEI		Normal	0.00439722	0.0529236	0.244597	0.309099	0.31123	0.0573632	0.00486749	0.0522123	0.239121	0.302984	0.321607	0.0591029
0.00445029	0.0530521	0.244708	0.30984	0.310376	0.0571382	512	CIEI		Normal	0.00438092	0.053087	0.244813	0.309787	0.310379	0.0571257	0.00519193	0.0533866	0.245642	0.310176	0.308744	0.056397
0.00454269	0.0530578	0.244758	0.309715	0.310389	0.0571157	512	CIEI		Normal	0.00455621	0.0530666	0.244874	0.309643	0.310326	0.0571213	0.00525766	0.0532922	0.245741	0.310311	0.308646	0.0562905
0.00442991	0.0530089	0.244776	0.309732	0.310528	0.0571077	512	CIEI		Anormal	0.00436152	0.0530417	0.244836	0.309623	0.31062	0.0571223	0.00495473	0.0538128	0.245684	0.310052	0.308908	0.0561307
0.0047761	0.0530312	0.244692	0.309455	0.310449	0.0571689	512	CIEI		Normal	0.00478392	0.0530133	0.244418	0.309298	0.310773	0.0572984	0.0055415	0.054508	0.249446	0.309956	0.304493	0.0554756
0.00446536	0.0540618	0.248364	0.309068	0.307162	0.0563877	512	CIEI		Normal	0.00435686	0.0539244	0.247881	0.308523	0.308272	0.0565736	0.00678884	0.0630847	0.242577	0.278743	0.326446	0.060885
0.00474328	0.0529967	0.244596	0.309445	0.310726	0.0570961	512	CIEI		Anormal	0.00446578	0.0530038	0.244747	0.309445	0.310832	0.0571145	0.00582074	0.0522794	0.241122	0.307175	0.316939	0.0563582
0.00478118	0.0529756	0.244497	0.309355	0.310897	0.0570869	512	CIEI		Anormal	0.0045054	0.0530159	0.244559	0.309219	0.311182	0.0571209	0.00561494	0.0521329	0.239054	0.304536	0.32218	0.0562714
0.00463258	0.0529728	0.244679	0.309443	0.310785	0.0570912	512	CIEI		Normal	0.00465431	0.0529896	0.244763	0.309445	0.310668	0.0570862	0.00546977	0.0528268	0.242916	0.308233	0.313758	0.0564436
0.00497316	0.0528974	0.244275	0.308979	0.311098	0.0573783	512	CIEI		Normal	0.00491986	0.0528661	0.244301	0.308805	0.311319	0.0574166	0.0051226	0.052513	0.241432	0.305901	0.316182	0.0585775
0.00441962	0.0529186	0.244312	0.309092	0.311467	0.0573981	512	CIEI		Normal	0.00443989	0.0528901	0.244281	0.308754	0.311791	0.0574852	0.00518075	0.0521125	0.239765	0.304107	0.31945	0.0592018
0.00443845	0.0529946	0.244842	0.309667	0.310548	0.0571011	512	CIEI		Normal	0.00445322	0.0530361	0.244954	0.309497	0.310565	0.0570885	0.00494923	0.0529218	0.244138	0.310038	0.311147	0.0564304
0.00441028	0.0528672	0.24418	0.309038	0.31161	0.0575086	512	CIEI		Normal	0.00439421	0.0528648	0.244189	0.308929	0.311722	0.0575305	0.00483741	0.0520032	0.239808	0.305095	0.319145	0.0589542
0.00441347	0.0529013	0.244212	0.309103	0.311538	0.0574385	512	CIEI		Normal	0.00444772	0.0528673	0.244213	0.308987	0.311635	0.0574797	0.00499214	0.0515788	0.236881	0.302372	0.324329	0.0598146
0.00445667	0.052887	0.244274	0.309173	0.311382	0.0574382	512	CIEI		Normal	0.00433501	0.0528967	0.244315	0.308945	0.311673	0.0574611	0.00489186	0.0517346	0.238719	0.304156	0.321309	0.0590647
0.0044636	0.0536165	0.244048	0.310041	0.310407	0.0569331	512	CIEI		Normal	0.00494682	0.0535409	0.243736	0.314467	0.306824	0.0560652	0.00452508	0.0536993	0.24396	0.309788	0.310574	0.0569577
0.00467289	0.0532056	0.244069	0.309977	0.310745	0.0569017	512	CIEI		Normal	0.00520162	0.0533508	0.243166	0.316665	0.305803	0.0555786	0.00478866	0.0532903	0.243752	0.30988	0.311011	0.0568695
0.00443373	0.0530805	0.244553	0.309442	0.31112	0.0569885	512	CIED		Anormal	0.00446414	0.0530897	0.244661	0.309443	0.310983	0.0569842	0.00519199	0.0532132	0.242561	0.310982	0.311544	0.0561676
0.00442875	0.0532017	0.244902	0.309249	0.310854	0.0569625	512	CIED		Normal	0.00434294	0.0532293	0.245006	0.309332	0.31076	0.0569355	0.00504942	0.0529922	0.243843	0.311116	0.310265	0.0564245
0.00434029	0.0488184	0.225162	0.315779	0.333378	0.0536379	512	CIED		Anormal	0.00406532	0.0487881	0.224853	0.31594	0.333941	0.0535632	0.00458983	0.0413966	0.192725	0.343919	0.34957	0.0506301
0.00439431	0.0525924	0.242385	0.312215	0.311435	0.0567322	512	CIED		Anormal	0.00444075	0.0526844	0.242707	0.311783	0.311334	0.0567956	0.00486775	0.0505618	0.231059	0.323761	0.314483	0.0556435
0.00435551	0.0526931	0.242979	0.312341	0.310644	0.0567215	512	CIED		Normal	0.00447747	0.0527017	0.243147	0.312143	0.310525	0.0567433	0.00502894	0.0503352	0.231735	0.328448	0.30949	0.0552637
0.00437528	0.0531118	0.244785	0.309398	0.310942	0.0569989	512	CIED		Normal	0.00438759	0.0531033	0.244887	0.309324	0.310903	0.057002	0.00491562	0.0531919	0.243272	0.308793	0.313383	0.0561587
0.00435057	0.0531109	0.245018	0.309002	0.311232	0.0569287	512	CIED		Normal	0.00431015	0.0531329	0.244995	0.309106	0.311116	0.0569718	0.00470375	0.0531044	0.2432	0.308779	0.313767	0.0561713
0.00447553	0.0531321	0.244831	0.309415	0.310819	0.0569577	512	CIED		Normal	0.00434035	0.0531309	0.244898	0.309365	0.310836	0.0570381	0.00523549	0.0531818	0.24278	0.309145	0.313313	0.056036
0.00461683	0.0530874	0.244793	0.309017	0.311211	0.0569131	512	CIED		Normal	0.00436266	0.0530976	0.244989	0.309053	0.311147	0.0569677	0.0055171	0.0533261	0.243139	0.308201	0.313273	0.0561989
0.00446263	0.0529971	0.244808	0.309714	0.31044	0.0571647	512	CIED		Normal	0.00441506	0.0530422	0.245009	0.309525	0.310389	0.0571977	0.00521904	0.0532357	0.245275	0.309387	0.310002	0.0564203
0.00440733	0.0530531	0.244757	0.309801	0.310394	0.0571592	512	CIED		Normal	0.00440253	0.0530835	0.244831	0.309703	0.31045	0.0571205	0.00499019	0.0535438	0.245624	0.31016	0.308933	0.0562627
0.00454415	0.0530227	0.2448	0.309689	0.310428	0.0571	512	CIED		Normal	0.00431595	0.0530562	0.24494	0.309648	0.310494	0.0571301	0.00495459	0.0533109	0.245161	0.309975	0.30971	0.0564095
0.00439518	0.0530125	0.244823	0.309601	0.31063	0.0571361	512	CIED		Anormal	0.00435733	0.0530575	0.244866	0.309551	0.310652	0.0571072	0.00507114	0.0539905	0.244225	0.309656	0.310522	0.0560727
0.00441722	0.0530375	0.244665	0.3096	0.31065	0.0572002	512	CIED		Normal	0.00439692	0.0529792	0.244643	0.309533	0.310815	0.057217	0.00517678	0.0547321	0.248461	0.309098	0.30658	0.0553344
0.00443773	0.0533778	0.246036	0.3094	0.30942	0.0568928	512	CIED		Normal	0.00440275	0.053235	0.245511	0.308977	0.3103	0.0571474	0.00506694	0.0537266	0.24731	0.310481	0.307048	0.0558893
0.00466802	0.052962	0.24484	0.309543	0.310476	0.0570677	512	CIED		Anormal	0.0045137	0.0530187	0.244945	0.309374	0.310632	0.0571264	0.00505814	0.0528335	0.244425	0.309484	0.310941	0.0567757
0.00465954	0.052993	0.24453	0.309496	0.310821	0.0571052	512	CIED		Anormal	0.00460872	0.0530325	0.244614	0.309206	0.311077	0.0570828	0.00598537	0.0526662	0.241628	0.305967	0.316756	0.0565743
0.00444846	0.053012	0.244687	0.309556	0.310813	0.0570749	512	CIED		Normal	0.00440957	0.0530328	0.244868	0.309503	0.310704	0.0570769	0.00504539	0.0523819	0.240289	0.306226	0.319236	0.056613
0.00465229	0.0529277	0.24428	0.309007	0.311327	0.0574209	512	CIED		Normal	0.00475903	0.0528704	0.244276	0.308695	0.311562	0.0574827	0.00532448	0.0521738	0.239816	0.303626	0.319577	0.0592674
0.00443592	0.0529451	0.244445	0.309128	0.311277	0.0573612	512	CIED		Normal	0.00439504	0.0528674	0.244392	0.308917	0.311618	0.0574179	0.00524493	0.0523301	0.240579	0.30455	0.318132	0.0589122
0.00443309	0.0529888	0.244779	0.30966	0.310611	0.0571143	512	CIED		Normal	0.00439719	0.0530216	0.244909	0.30942	0.310742	0.0571113	0.00511053	0.0531303	0.243228	0.309093	0.312598	0.0564754
0.00456075	0.0528914	0.244262	0.308983	0.311477	0.0574478	512	CIED		Normal	0.00447837	0.0528773	0.244184	0.308788	0.311819	0.0575115	0.004992	0.052284	0.240038	0.304645	0.318814	0.0589888
0.00451716	0.0528482	0.244181	0.308983	0.311636	0.0574436	512	CIED		Normal	0.0045291	0.0528754	0.244164	0.308729	0.311821	0.0575104	0.00501587	0.0518919	0.239052	0.303841	0.320796	0.0592605
0.00464579	0.0528453	0.244093	0.309029	0.31161	0.0574193	512	CIED		Normal	0.00449843	0.0528668	0.244228	0.308865	0.311694	0.0574792	0.00534462	0.0516527	0.238102	0.303063	0.322598	0.0591764
0.00458255	0.0535606	0.244085	0.310083	0.310257	0.0569588	512	CIED		Normal	0.00500802	0.0536138	0.243164	0.314772	0.307033	0.056034	0.00445252	0.053659	0.243938	0.309885	0.310576	0.0570218

## Sheet: 1024
ch2: 0-1kHz	ch2: 1-10kHz	ch2: 10-50kHz	ch2: 50-100kHz	ch2: 100-150kHz	ch2: 150-160kHz	Ventana	quadrant	class	ch0: 0-1kHz	ch0: 1-10kHz	ch0: 10-50kHz	ch0: 50-100kHz	ch0: 100-150kHz	ch0: 150-160kHz	ch1: 0-1kHz	ch1: 1-10kHz	ch1: 10-50kHz	ch1: 50-100kHz	ch1: 100-150kHz	ch1: 150-160kHz
0.00654508	0.0529543	0.248072	0.310898	0.31046	0.0609167	1024	CSII	Anormal	0.00647561	0.0529789	0.248226	0.310795	0.310411	0.0609459	0.00729621	0.0526871	0.243874	0.312413	0.31368	0.0600147
0.00639193	0.0529543	0.248158	0.310538	0.310844	0.0609455	1024	CSII	Normal	0.00638608	0.0529934	0.248275	0.310512	0.310729	0.0609466	0.00710414	0.0526249	0.244306	0.309695	0.315851	0.0603347
0.00594538	0.0486921	0.228485	0.313851	0.335917	0.057689	1024	CSII	Anormal	0.0059454	0.0489868	0.229733	0.313161	0.334897	0.0577987	0.00564452	0.0416665	0.195948	0.338772	0.354034	0.0553858
0.00641405	0.0524953	0.24608	0.313599	0.310586	0.0607314	1024	CSII	Anormal	0.00636263	0.0525857	0.24644	0.313305	0.310452	0.0607507	0.00658516	0.0502037	0.233271	0.32724	0.313587	0.0593741
0.00641751	0.0525732	0.246464	0.313531	0.310192	0.0607241	1024	CSII	Normal	0.00636268	0.0525762	0.246602	0.313377	0.310237	0.0607251	0.00675345	0.0499957	0.23373	0.328875	0.311307	0.0595133
0.00645219	0.0530011	0.248416	0.310807	0.310174	0.0609871	1024	CSII	Normal	0.0064056	0.0529997	0.248488	0.31085	0.310099	0.0609902	0.00674946	0.0530086	0.247598	0.310982	0.311374	0.0601695
0.00638637	0.0530014	0.248528	0.310523	0.310514	0.0608904	1024	CSII	Normal	0.0063825	0.0530212	0.248526	0.310526	0.310475	0.0609118	0.00686886	0.053093	0.246985	0.310581	0.312339	0.0600117
0.00632371	0.0529408	0.248408	0.311014	0.310126	0.0610145	1024	CSII	Normal	0.00637895	0.0529769	0.248553	0.310875	0.310056	0.0609879	0.00665532	0.0517102	0.24606	0.313288	0.311557	0.0606499
0.00648451	0.0529776	0.248544	0.310502	0.310438	0.0608838	1024	CSII	Normal	0.00651354	0.0529876	0.248576	0.310417	0.310394	0.0609428	0.0073908	0.053139	0.24706	0.310128	0.312125	0.060037
0.00638187	0.0528013	0.248114	0.310674	0.31054	0.0613195	1024	CSII	Normal	0.00641075	0.0528357	0.248223	0.310578	0.310486	0.0612894	0.0070448	0.0524948	0.245683	0.307455	0.315233	0.0620058
0.00642887	0.0529599	0.248328	0.311197	0.30983	0.061078	1024	CSII	Normal	0.00637385	0.0529393	0.24849	0.31117	0.309762	0.0610834	0.00698991	0.053324	0.248932	0.311388	0.308793	0.0603866
0.00638132	0.0529125	0.248346	0.311237	0.309849	0.0610835	1024	CSII	Normal	0.00635271	0.0529424	0.248434	0.311117	0.309856	0.0611167	0.00708109	0.0531775	0.248762	0.311598	0.308877	0.0603287
0.00639219	0.0529385	0.248429	0.311087	0.309893	0.061074	1024	CSII	Anormal	0.00644459	0.0529093	0.248515	0.310847	0.31002	0.0610813	0.00732698	0.0539545	0.248443	0.31117	0.308885	0.0600332
0.00649379	0.0529521	0.248278	0.310929	0.309995	0.0611692	1024	CSII	Normal	0.00640293	0.0528862	0.248114	0.310706	0.310437	0.0612774	0.00723219	0.054351	0.252982	0.311397	0.304399	0.059392
0.00643143	0.0538505	0.251671	0.310154	0.307245	0.0604296	1024	CSII	Normal	0.00634517	0.0537691	0.251236	0.309694	0.308046	0.0606983	0.00731304	0.0497972	0.235655	0.292346	0.337661	0.0673635
0.00648336	0.0528962	0.248443	0.311148	0.309784	0.0610651	1024	CSII	Anormal	0.00649629	0.052923	0.248604	0.310936	0.309772	0.0610833	0.00704723	0.052627	0.248095	0.311316	0.310164	0.0605929
0.00642254	0.0528711	0.24826	0.310881	0.310333	0.0610537	1024	CSII	Anormal	0.00638238	0.0528932	0.248201	0.310668	0.31062	0.0610643	0.00709786	0.0521292	0.244333	0.307298	0.318499	0.0605764
0.00640142	0.0528885	0.248277	0.311044	0.310156	0.0610478	1024	CSII	Normal	0.00636678	0.0529279	0.248519	0.311012	0.309967	0.06103	0.00703402	0.0528221	0.246933	0.310405	0.31241	0.0602689
0.00639378	0.0528448	0.248029	0.310593	0.310609	0.0613605	1024	CSII	Normal	0.00641582	0.0528156	0.248036	0.310377	0.310788	0.0614175	0.00698156	0.0523478	0.245132	0.307536	0.315409	0.0625319
0.00656292	0.0528248	0.247843	0.310427	0.310796	0.0613719	1024	CSII	Normal	0.00642304	0.0527697	0.247884	0.310241	0.31105	0.0614728	0.00706545	0.0522681	0.24487	0.3068	0.316215	0.0627154
0.00644603	0.0529166	0.248417	0.311031	0.309946	0.0610621	1024	CSII	Normal	0.00638806	0.0529296	0.24853	0.31096	0.309985	0.0610383	0.00696253	0.0529711	0.24752	0.310919	0.31105	0.0604352
0.0064068	0.0527539	0.247656	0.310407	0.311125	0.0614781	1024	CSII	Normal	0.00636313	0.0527433	0.247607	0.310168	0.31138	0.0615771	0.00695746	0.0514695	0.241636	0.304719	0.32144	0.0637958
0.00654061	0.0527896	0.247796	0.310577	0.310745	0.0613913	1024	CSII	Normal	0.00648091	0.0527899	0.247807	0.310399	0.310963	0.0613973	0.00699138	0.0520538	0.244279	0.30669	0.317239	0.0627122
0.00647152	0.0527479	0.247843	0.310474	0.310949	0.0613528	1024	CSII	Normal	0.0063511	0.052771	0.247811	0.310362	0.311118	0.0614158	0.00686644	0.0518831	0.243929	0.306571	0.318161	0.0625687
0.00649238	0.0534207	0.247771	0.31141	0.309754	0.060916	1024	CSII	Normal	0.00739161	0.0534819	0.246843	0.31556	0.306587	0.0599583	0.00663183	0.0534903	0.247524	0.311199	0.309965	0.0609542
0.00660308	0.0531103	0.247536	0.311482	0.310218	0.060855	1024	CSII	Normal	0.00721174	0.0531487	0.24594	0.319451	0.304866	0.0593198	0.00641231	0.0531757	0.247339	0.311405	0.310586	0.0608838
0.00651417	0.0530818	0.247676	0.311535	0.310132	0.0608449	1024	CSII	Normal	0.00728512	0.0531428	0.24559	0.320955	0.303846	0.0590874	0.00647215	0.0531278	0.247443	0.311369	0.310519	0.0608443
0.00641682	0.0531289	0.247927	0.311167	0.310236	0.0609001	1024	CSIE	Normal	0.00686294	0.0535262	0.246659	0.318858	0.304634	0.059328	0.00637044	0.0529437	0.247369	0.311232	0.310897	0.0609588
0.00646869	0.0529521	0.24802	0.310901	0.310518	0.060978	1024	CSID	Anormal	0.00637238	0.0530264	0.248262	0.31085	0.31038	0.060943	0.00675066	0.0530261	0.245621	0.311996	0.312302	0.0602048
0.00657872	0.0529282	0.248015	0.310596	0.310722	0.060998	1024	CSID	Normal	0.00650271	0.0529731	0.248199	0.310542	0.31062	0.0609896	0.00703614	0.0527708	0.244905	0.309224	0.315367	0.0606088
0.0059762	0.0482752	0.226167	0.318224	0.334751	0.0572647	1024	CSID	Anormal	0.00587988	0.0485669	0.227743	0.31735	0.333587	0.0574893	0.00587497	0.0411148	0.192534	0.345847	0.351646	0.0545147
0.00642823	0.0524669	0.246067	0.313558	0.31071	0.0606754	1024	CSID	Anormal	0.00628385	0.0525573	0.246321	0.313343	0.310648	0.0607403	0.00680021	0.0503893	0.233239	0.32703	0.31357	0.0592315
0.00635111	0.0526333	0.246755	0.313468	0.309908	0.0607636	1024	CSID	Normal	0.00639569	0.0526556	0.246863	0.313309	0.309894	0.0607646	0.00670246	0.0504262	0.234544	0.330625	0.309103	0.0588405
0.00642821	0.0529573	0.248468	0.310823	0.310218	0.0609272	1024	CSID	Normal	0.00651616	0.053011	0.248457	0.31079	0.310119	0.0609393	0.00682041	0.0531381	0.247838	0.310661	0.311306	0.0601031
0.00648846	0.0530162	0.248472	0.310485	0.310466	0.0609196	1024	CSID	Normal	0.0064207	0.0530234	0.248547	0.310542	0.310352	0.0609551	0.00691601	0.0529662	0.244734	0.309639	0.315999	0.0596784
0.00646997	0.0530062	0.248407	0.310877	0.310129	0.0609465	1024	CSID	Normal	0.00635955	0.0529922	0.248477	0.310791	0.310162	0.0610432	0.00693721	0.0532134	0.245892	0.310283	0.313699	0.0598612
0.00641883	0.0529508	0.248519	0.310435	0.310631	0.0608808	1024	CSID	Normal	0.00651591	0.0529816	0.248548	0.31038	0.310492	0.0609217	0.00728642	0.0532491	0.24618	0.309614	0.313642	0.0599232
0.00643248	0.0529165	0.248453	0.311158	0.309749	0.0611091	1024	CSID	Normal	0.00640424	0.0529473	0.248564	0.311025	0.309757	0.0611249	0.00693675	0.053093	0.24847	0.311151	0.30972	0.0604624
0.00647537	0.0529249	0.24838	0.311195	0.309753	0.0610859	1024	CSID	Normal	0.00640053	0.052974	0.24848	0.311159	0.309746	0.0610625	0.00696084	0.0534446	0.249514	0.311593	0.308113	0.0601836
0.00671247	0.0529341	0.248289	0.311056	0.309772	0.0610596	1024	CSID	Normal	0.00668206	0.0529451	0.248395	0.310919	0.309833	0.0610599	0.00748847	0.0532639	0.248023	0.311221	0.309625	0.0601952
0.00641802	0.0529497	0.248437	0.311031	0.309926	0.0610705	1024	CSID	Anormal	0.00637255	0.0529151	0.248454	0.310884	0.310119	0.0610794	0.00728456	0.0540553	0.247142	0.31112	0.310408	0.0598462
0.00644917	0.0529018	0.248328	0.311174	0.309848	0.0611107	1024	CSID	Normal	0.00644797	0.0529178	0.248276	0.311004	0.310034	0.0611417	0.00837834	0.0555435	0.254967	0.31048	0.301918	0.0584068
0.00665571	0.0532303	0.249372	0.31071	0.308929	0.0609046	1024	CSID	Normal	0.006474	0.0531275	0.249032	0.310422	0.309682	0.0610716	0.00773581	0.0541087	0.251481	0.311895	0.305383	0.0591865
0.00668526	0.0528497	0.24848	0.311062	0.309737	0.0610321	1024	CSID	Anormal	0.00662886	0.0528852	0.248471	0.310903	0.309903	0.0610534	0.00744474	0.052938	0.248186	0.310942	0.309733	0.0605318
0.00659906	0.0528863	0.248228	0.310821	0.310231	0.0610555	1024	CSID	Anormal	0.00639479	0.0529192	0.248247	0.310738	0.310507	0.0610249	0.00747981	0.0527789	0.245459	0.307263	0.316315	0.0605837
0.00651838	0.0528831	0.248216	0.310926	0.310253	0.0610224	1024	CSID	Normal	0.00634241	0.0529276	0.24848	0.310894	0.310114	0.0610573	0.00731483	0.0525604	0.2457	0.308685	0.31513	0.0604977
0.00658163	0.0528002	0.24789	0.310399	0.310768	0.0613916	1024	CSID	Normal	0.00643179	0.0527776	0.247881	0.310106	0.311142	0.0614976	0.00715688	0.0520692	0.243806	0.304658	0.318844	0.0634109
0.00674183	0.0528217	0.247866	0.310398	0.310638	0.0613617	1024	CSID	Normal	0.00664176	0.0528119	0.247803	0.31014	0.311005	0.0614334	0.00736683	0.0522693	0.243969	0.305597	0.317665	0.0630416
0.00640895	0.0529134	0.248386	0.31103	0.309976	0.0611073	1024	CSID	Normal	0.00639409	0.05291	0.248558	0.310811	0.31009	0.0610441	0.0069079	0.0528835	0.247302	0.310613	0.311683	0.0604806
0.00646689	0.0527971	0.247854	0.310423	0.310871	0.0614233	1024	CSID	Normal	0.00651621	0.0527536	0.247788	0.31024	0.311095	0.0614485	0.00730399	0.0520231	0.24323	0.305852	0.3185	0.0630487
0.00639351	0.0527923	0.247772	0.310596	0.31088	0.061405	1024	CSID	Normal	0.00634149	0.0527978	0.247859	0.310387	0.311014	0.0614414	0.0067916	0.052079	0.244171	0.30652	0.317586	0.0628035
0.00641644	0.0528032	0.24775	0.310356	0.311091	0.0614177	1024	CSID	Normal	0.00635753	0.0527396	0.24777	0.310144	0.311295	0.0615361	0.00692758	0.0517934	0.243277	0.305676	0.319151	0.0631672
0.0064496	0.0534244	0.247683	0.311485	0.309745	0.0609638	1024	CSID	Normal	0.00727277	0.0533785	0.246459	0.316578	0.306268	0.0598498	0.00655427	0.0535509	0.247402	0.311256	0.310037	0.0609417
0.00643431	0.0530848	0.247824	0.311329	0.310247	0.0608648	1024	CSID	Normal	0.00684497	0.0535275	0.24727	0.318354	0.304586	0.0593055	0.00642404	0.0531325	0.247598	0.311194	0.310525	0.0608991
0.00653183	0.0529302	0.248142	0.310869	0.310441	0.0609209	1024	CSEI	Anormal	0.0064113	0.0529727	0.248189	0.311012	0.310347	0.0608995	0.00703704	0.0529943	0.246409	0.31236	0.310959	0.0601421
0.00641043	0.053035	0.248403	0.310738	0.310358	0.0608854	1024	CSEI	Normal	0.0064374	0.0530993	0.248494	0.310684	0.310226	0.0608966	0.00680583	0.0528836	0.247612	0.312526	0.309657	0.0603902
0.00595829	0.0485074	0.227233	0.314494	0.336918	0.0574982	1024	CSEI	Anormal	0.00589044	0.0488046	0.228669	0.313777	0.335781	0.0576398	0.00582218	0.0405818	0.191096	0.34045	0.358074	0.0554979
0.0064798	0.0524625	0.245876	0.31372	0.310663	0.0606987	1024	CSEI	Anormal	0.00643972	0.0525672	0.246103	0.313511	0.310597	0.0606837	0.00674232	0.0502149	0.233159	0.326398	0.314236	0.0595425
0.0065067	0.0525812	0.246428	0.313532	0.310161	0.060707	1024	CSEI	Normal	0.00632113	0.0526085	0.24672	0.313357	0.310157	0.0607585	0.00687529	0.0504061	0.235413	0.327672	0.310294	0.0595504
0.00642905	0.0529507	0.248471	0.310807	0.310191	0.0609824	1024	CSEI	Normal	0.00642867	0.0529438	0.248494	0.310842	0.310113	0.0610013	0.00681477	0.0529926	0.247615	0.311039	0.311255	0.0601567
0.0063824	0.052986	0.248482	0.310668	0.310443	0.0608784	1024	CSEI	Normal	0.00640337	0.0529997	0.24846	0.310675	0.310352	0.0609437	0.00677108	0.0530282	0.247033	0.310638	0.312267	0.0601361
0.00643282	0.0529406	0.2483	0.310972	0.310237	0.0609421	1024	CSEI	Normal	0.00643142	0.0530047	0.248566	0.31079	0.310082	0.0609575	0.00675436	0.0534522	0.253628	0.312429	0.304729	0.0588909
0.00641925	0.052943	0.248594	0.310552	0.310427	0.0609115	1024	CSEI	Normal	0.00645531	0.0529766	0.248612	0.310518	0.310343	0.0609359	0.00712832	0.0536205	0.246234	0.309969	0.312852	0.0600603
0.00647743	0.0527994	0.248041	0.310665	0.310593	0.0612612	1024	CSEI	Normal	0.00667675	0.0528112	0.248101	0.310572	0.31042	0.0612536	0.0075309	0.0523842	0.244862	0.306136	0.316619	0.062416
0.00641504	0.0529355	0.248414	0.311199	0.309798	0.0610589	1024	CSEI	Normal	0.00638569	0.0529632	0.248459	0.311096	0.309818	0.0610918	0.00695533	0.0534241	0.249374	0.311815	0.307985	0.0602584
0.00669218	0.0529319	0.248294	0.311131	0.309705	0.0610642	1024	CSEI	Normal	0.006376	0.0529398	0.248477	0.311042	0.309892	0.0610832	0.00775512	0.0532115	0.248317	0.311181	0.309231	0.0601299
0.00638954	0.0529584	0.248319	0.311103	0.309973	0.0610828	1024	CSEI	Anormal	0.00639495	0.0529099	0.24844	0.310974	0.310041	0.0610663	0.00721879	0.0538332	0.248514	0.311224	0.30901	0.060022
0.00647271	0.0528853	0.2482	0.311182	0.309931	0.0611403	1024	CSEI	Normal	0.00636008	0.0529136	0.248181	0.311045	0.310121	0.0612053	0.00717949	0.0547613	0.253867	0.310952	0.303838	0.0591339
0.00663105	0.0539129	0.251876	0.310437	0.306581	0.0603405	1024	CSEI	Normal	0.00635875	0.0535102	0.250522	0.310129	0.308495	0.0607909	0.00689605	0.0532351	0.249974	0.312556	0.307053	0.0601069
0.0065079	0.0529189	0.248445	0.311111	0.309773	0.0610759	1024	CSEI	Anormal	0.0064716	0.0529377	0.24852	0.310903	0.309896	0.0610952	0.00703351	0.0526372	0.248095	0.311274	0.310164	0.0606371
0.00674429	0.0528697	0.248118	0.310756	0.310262	0.0610733	1024	CSEI	Anormal	0.0065331	0.0528623	0.248293	0.310645	0.310433	0.0610657	0.00755576	0.0523743	0.245237	0.307372	0.317016	0.0603603
0.00644329	0.0528599	0.248198	0.310966	0.310302	0.0610452	1024	CSEI	Normal	0.00644938	0.0529279	0.248388	0.310848	0.310163	0.0610383	0.00710427	0.0523879	0.244368	0.308063	0.317469	0.0605357
0.00655371	0.0528155	0.247923	0.31052	0.31063	0.0613997	1024	CSEI	Normal	0.00663724	0.0527875	0.247971	0.310308	0.310742	0.0613908	0.00722178	0.0521607	0.244565	0.306158	0.316797	0.0630453
0.00662672	0.0527961	0.247829	0.310413	0.31076	0.0614093	1024	CSEI	Normal	0.00641691	0.0527874	0.247926	0.310184	0.311017	0.0615007	0.00745255	0.0519147	0.243203	0.304623	0.319044	0.0637379
0.00640872	0.0529177	0.248414	0.311107	0.309917	0.0610529	1024	CSEI	Normal	0.00639223	0.0529342	0.248542	0.310888	0.310008	0.0610657	0.00698808	0.0531348	0.247639	0.311198	0.310499	0.0603882
0.0065423	0.0526776	0.247532	0.310126	0.311416	0.0615418	1024	CSEI	Normal	0.00643251	0.052673	0.247452	0.309945	0.31171	0.0616284	0.00749125	0.0511164	0.239285	0.302393	0.325575	0.064224
0.00672345	0.0527888	0.247801	0.310563	0.310577	0.0613685	1024	CSEI	Normal	0.00661729	0.0527972	0.247905	0.310396	0.310774	0.0613543	0.00725424	0.0521667	0.244762	0.306999	0.316194	0.0625687
0.00638357	0.0528033	0.247765	0.310489	0.31099	0.0613913	1024	CSEI	Normal	0.00634855	0.0527789	0.247771	0.310259	0.311223	0.0614696	0.00682231	0.0519008	0.243733	0.306408	0.31834	0.0627802
0.00652479	0.0534418	0.247672	0.311512	0.309693	0.0609135	1024	CSEI	Normal	0.00727278	0.0535747	0.246973	0.315639	0.30646	0.0598976	0.00660055	0.0535701	0.247515	0.311172	0.30996	0.0609436
0.00651895	0.0531034	0.247647	0.311487	0.310181	0.0608539	1024	CSEI	Normal	0.00734004	0.0534391	0.246636	0.318655	0.304489	0.0593006	0.00640522	0.0531274	0.24747	0.311326	0.310569	0.0608873
0.0064673	0.0529537	0.248101	0.310855	0.31052	0.0609389	1024	CSED	Anormal	0.00644431	0.0529917	0.248259	0.310882	0.310302	0.0609584	0.00694484	0.0531968	0.246364	0.312242	0.311067	0.0600629
0.00652073	0.052934	0.248116	0.310632	0.310669	0.0609701	1024	CSED	Normal	0.00633634	0.0529514	0.248335	0.310676	0.310553	0.0609799	0.0072768	0.0529125	0.245017	0.309438	0.314917	0.0603417
0.00614343	0.0484404	0.227071	0.317539	0.334159	0.0572852	1024	CSED	Anormal	0.00600497	0.0487245	0.228418	0.316939	0.333054	0.0574509	0.00600093	0.0409503	0.191717	0.345915	0.352589	0.0543822
0.00646663	0.0524976	0.24585	0.313651	0.310777	0.0606682	1024	CSED	Anormal	0.00631665	0.0525776	0.24634	0.313344	0.310603	0.0607153	0.00679269	0.0505885	0.233781	0.326389	0.313404	0.0592786
0.00635305	0.0526341	0.246672	0.313602	0.309905	0.0607185	1024	CSED	Normal	0.00632972	0.0526255	0.246801	0.31348	0.309914	0.0607427	0.00659751	0.0505271	0.234894	0.330505	0.308861	0.0588532
0.00649228	0.052935	0.248421	0.310771	0.310255	0.0609569	1024	CSED	Normal	0.00636104	0.0530126	0.248515	0.310818	0.310172	0.0609536	0.00683374	0.0531442	0.247431	0.310336	0.312091	0.0600547
0.00647208	0.0529946	0.248414	0.310609	0.310424	0.0609331	1024	CSED	Normal	0.00634589	0.0530318	0.248539	0.310517	0.310446	0.0609565	0.00698587	0.0527877	0.24711	0.311048	0.312095	0.059884
0.00643947	0.0530051	0.248387	0.310869	0.3102	0.0609363	1024	CSED	Normal	0.006401	0.0530189	0.248514	0.310808	0.310085	0.0610091	0.00689594	0.0532714	0.247621	0.310913	0.311069	0.0600852
0.00643097	0.0529661	0.248465	0.310485	0.310601	0.0608945	1024	CSED	Normal	0.00639832	0.0529838	0.248573	0.31047	0.310481	0.0609347	0.00695934	0.0533146	0.247022	0.309789	0.312696	0.0600896
0.00650007	0.0529055	0.248471	0.311115	0.309737	0.0610842	1024	CSED	Normal	0.00639695	0.0529161	0.248522	0.311131	0.309756	0.0610961	0.00699919	0.0534044	0.249272	0.31091	0.30886	0.0603615
0.00648703	0.0529602	0.248349	0.311191	0.30978	0.0610585	1024	CSED	Normal	0.00639868	0.0529699	0.24842	0.311153	0.309793	0.0610908	0.0071428	0.0534913	0.249225	0.311428	0.308337	0.0601712
0.00643928	0.0529619	0.248395	0.31109	0.309887	0.0610448	1024	CSED	Normal	0.00640766	0.0529565	0.248427	0.311031	0.309918	0.0610771	0.00723914	0.0531901	0.248139	0.311245	0.309782	0.0602338
0.00641412	0.0529257	0.248426	0.311077	0.309959	0.0610231	1024	CSED	Anormal	0.00639094	0.0529134	0.248457	0.310955	0.310037	0.0610701	0.00725587	0.0538224	0.248907	0.311149	0.30863	0.0600567
0.00646612	0.0529249	0.248337	0.311064	0.309951	0.0610825	1024	CSED	Normal	0.00638531	0.0529217	0.248307	0.310944	0.310128	0.0611378	0.00740438	0.0545783	0.252537	0.310311	0.305576	0.0593524
0.00641306	0.0532395	0.249409	0.310725	0.309103	0.0609253	1024	CSED	Normal	0.00633546	0.0531409	0.24907	0.310361	0.309805	0.0610997	0.00697589	0.0538871	0.251393	0.311692	0.306187	0.0596442
0.00673091	0.0528672	0.248501	0.310962	0.30979	0.0609957	1024	CSED	Anormal	0.00658784	0.0528799	0.248605	0.310764	0.309998	0.0610117	0.00719056	0.0526302	0.247855	0.310805	0.310824	0.0605473
0.00654208	0.0529051	0.248203	0.310838	0.31025	0.0610776	1024	CSED	Anormal	0.00647928	0.0528819	0.248316	0.310685	0.310413	0.0610544	0.00723602	0.0528618	0.246102	0.308056	0.315085	0.0605359
0.00646977	0.0529393	0.24825	0.310995	0.310128	0.0610435	1024	CSED	Normal	0.00636648	0.0529488	0.248352	0.310894	0.310193	0.061061	0.00705481	0.052679	0.246185	0.30916	0.314299	0.060505
0.00651721	0.0527892	0.24804	0.310409	0.310725	0.0613417	1024	CSED	Normal	0.00657357	0.0527947	0.247914	0.310174	0.310969	0.0614094	0.00732148	0.0525953	0.245356	0.306089	0.315889	0.0626308
0.00650915	0.052816	0.247855	0.310468	0.310792	0.0613986	1024	CSED	Normal	0.00644806	0.0527666	0.247867	0.310224	0.311087	0.0614546	0.00698273	0.0523734	0.244125	0.305712	0.317661	0.0630765
0.00648355	0.05294	0.248443	0.310899	0.309978	0.0610772	1024	CSED	Normal	0.00638711	0.0529023	0.248498	0.310748	0.310212	0.0610731	0.007232	0.0531461	0.246711	0.310041	0.312348	0.0603818
0.00654209	0.0527161	0.247786	0.310203	0.311134	0.0614474	1024	CSED	Normal	0.00644628	0.0527152	0.247651	0.31002	0.311486	0.0615265	0.00734164	0.0519946	0.241817	0.30295	0.32203	0.063839
0.00645998	0.0527682	0.247769	0.310598	0.310812	0.0614337	1024	CSED	Normal	0.00644867	0.0527485	0.247758	0.310348	0.311053	0.0614859	0.00672678	0.0513949	0.240684	0.303242	0.323768	0.0642072
0.00652157	0.0527595	0.247636	0.310372	0.311114	0.0614396	1024	CSED	Normal	0.00641297	0.0527473	0.24771	0.310134	0.311357	0.0614956	0.00693286	0.051953	0.243188	0.305096	0.319601	0.0631946
0.00672589	0.0534357	0.247639	0.311387	0.309679	0.0608836	1024	CSED	Normal	0.008363	0.0538099	0.246265	0.317116	0.304731	0.0594202	0.00668318	0.0534932	0.247549	0.311204	0.309879	0.0609307
0.00644512	0.0531282	0.247799	0.311457	0.310054	0.0608856	1024	CSED	Normal	0.00697664	0.0535264	0.247135	0.3188	0.304185	0.0592635	0.00645821	0.05315	0.247591	0.311307	0.310341	0.0609095
0.00641014	0.0529072	0.248122	0.311002	0.310451	0.0609409	1024	CIII	Anormal	0.00634084	0.0529674	0.248248	0.310852	0.310451	0.0609765	0.00694463	0.0527087	0.243927	0.313223	0.313162	0.0599826
0.00600952	0.0491093	0.230407	0.31217	0.33381	0.058979	1024	CIII	Normal	0.00593757	0.0493799	0.23159	0.311693	0.332746	0.0590947	0.00585759	0.0420586	0.19901	0.336895	0.350826	0.0565626
0.00593427	0.0488505	0.229282	0.31381	0.33502	0.0576455	1024	CIII	Anormal	0.00595453	0.0491667	0.230383	0.313001	0.334302	0.0576906	0.00562606	0.0425108	0.200207	0.336334	0.351403	0.0552498
0.00641365	0.0525115	0.246131	0.313466	0.310658	0.0607169	1024	CIII	Anormal	0.00634179	0.0526008	0.246499	0.31309	0.310607	0.0607471	0.00655585	0.050653	0.234375	0.327862	0.311778	0.0590273
0.00632143	0.0526325	0.246827	0.312941	0.310381	0.060782	1024	CIII	Normal	0.0063024	0.0526407	0.246804	0.313009	0.310363	0.0607604	0.00659216	0.0498697	0.235087	0.328133	0.310999	0.0595429
0.00646498	0.0530262	0.248464	0.310842	0.310089	0.0609445	1024	CIII	Normal	0.00642221	0.053031	0.248503	0.310872	0.310001	0.0610002	0.00687376	0.0531163	0.247238	0.310689	0.311828	0.0601478
0.00641447	0.0529672	0.248565	0.310403	0.310652	0.0608411	1024	CIII	Normal	0.0063585	0.0529849	0.248616	0.310379	0.310569	0.0609323	0.00690412	0.0530179	0.245053	0.309683	0.315476	0.0597736
0.006389	0.0529787	0.248392	0.310843	0.310247	0.0609872	1024	CIII	Normal	0.00632183	0.0529857	0.248459	0.310849	0.310211	0.0610076	0.00688427	0.0532608	0.246886	0.311255	0.311504	0.0600786
0.00647741	0.0529973	0.248477	0.310587	0.310398	0.0609079	1024	CIII	Normal	0.00647968	0.0529836	0.248498	0.310657	0.310281	0.0609409	0.00727603	0.0532257	0.24682	0.310298	0.312179	0.0600736
0.00643848	0.0528265	0.248146	0.310745	0.310486	0.0611928	1024	CIII	Normal	0.00635851	0.0528518	0.248284	0.310821	0.31035	0.06117	0.0067265	0.0526394	0.246467	0.308319	0.314407	0.0613613
0.00649879	0.0529162	0.248331	0.31118	0.309791	0.0611033	1024	CIII	Normal	0.00647786	0.0529542	0.248335	0.311183	0.309783	0.0610872	0.00700747	0.0533338	0.249056	0.311622	0.308382	0.0604219
0.00641676	0.052928	0.248367	0.311196	0.30981	0.0610979	1024	CIII	Normal	0.0063728	0.0529378	0.248493	0.311172	0.309771	0.0610776	0.00688753	0.053115	0.249373	0.31193	0.30821	0.0603039
0.00648199	0.0529197	0.248335	0.311097	0.309926	0.0610658	1024	CIII	Anormal	0.00652308	0.0529217	0.248352	0.310906	0.310036	0.0610834	0.00724225	0.0536299	0.248863	0.311408	0.308788	0.0599059
0.0065629	0.0530152	0.248457	0.310917	0.309767	0.0610997	1024	CIII	Normal	0.00660326	0.0529791	0.248351	0.310711	0.310003	0.0611604	0.00777909	0.0548535	0.25399	0.311887	0.302197	0.059004
0.00646601	0.0543626	0.253561	0.310309	0.305119	0.0599502	1024	CIII	Normal	0.00632894	0.0536829	0.251379	0.309986	0.307886	0.0605444	0.00695966	0.0527425	0.248576	0.312995	0.308165	0.0604035
0.00644585	0.0528488	0.248287	0.310997	0.310159	0.0610936	1024	CIII	Anormal	0.00649992	0.0529064	0.248339	0.310866	0.310113	0.0611048	0.00731726	0.052651	0.246259	0.310141	0.313125	0.0603729
0.00657382	0.052867	0.248174	0.310871	0.310292	0.0610483	1024	CIII	Anormal	0.00637564	0.0529095	0.248252	0.310638	0.310571	0.0610869	0.007316	0.0521126	0.24375	0.306812	0.319511	0.0604473
0.00643037	0.0528969	0.248268	0.31107	0.310081	0.0610697	1024	CIII	Normal	0.00643477	0.05294	0.248485	0.310891	0.310033	0.061041	0.00726029	0.0528666	0.246873	0.310264	0.312402	0.0602002
0.00650155	0.0528118	0.248061	0.310723	0.310431	0.0612974	1024	CIII	Normal	0.00640116	0.052828	0.248078	0.310607	0.310575	0.0613404	0.00689718	0.0524977	0.246337	0.308896	0.313198	0.0620922
0.00647546	0.0528194	0.247919	0.310628	0.310662	0.0613142	1024	CIII	Normal	0.00654497	0.0528082	0.247883	0.310325	0.310865	0.0614023	0.00715205	0.0522877	0.244998	0.30716	0.315921	0.0623877
0.0065267	0.0529027	0.248397	0.311055	0.309881	0.0610421	1024	CIII	Normal	0.00648438	0.0528983	0.24854	0.310952	0.3099	0.0610474	0.00702528	0.0529933	0.24805	0.311649	0.309808	0.0603238
0.00643283	0.0527579	0.24781	0.310624	0.310809	0.0614006	1024	CIII	Normal	0.00642251	0.0527596	0.247814	0.31043	0.310944	0.0614689	0.00694469	0.0520649	0.24399	0.307124	0.317325	0.0625116
0.00649209	0.0527858	0.247883	0.310586	0.310706	0.0613739	1024	CIII	Normal	0.00643334	0.0528226	0.247827	0.310425	0.310884	0.061436	0.00722105	0.0520656	0.244041	0.306573	0.317217	0.0628229
0.00648545	0.0528102	0.247829	0.310666	0.310665	0.0613719	1024	CIII	Normal	0.0064006	0.0527594	0.247868	0.310493	0.310916	0.0614085	0.00700379	0.0517704	0.242519	0.305977	0.319869	0.0628448
0.00654473	0.0534743	0.247746	0.311389	0.309672	0.0609113	1024	CIII	Normal	0.00722412	0.053563	0.246876	0.315754	0.306479	0.0599297	0.0066675	0.0535349	0.247426	0.311176	0.309971	0.0609578
0.00639705	0.0531008	0.247639	0.311563	0.31022	0.0608732	1024	CIII	Normal	0.00693778	0.053048	0.245814	0.319418	0.305173	0.0594961	0.00645126	0.0531452	0.247496	0.31137	0.310476	0.0608522
0.00644881	0.0529307	0.24803	0.310922	0.310563	0.0609325	1024	CIID	Anormal	0.00635649	0.0529897	0.248249	0.310857	0.310398	0.0609831	0.00692419	0.0529872	0.245563	0.312297	0.311975	0.060153
0.00649204	0.0531134	0.248349	0.310719	0.310243	0.0609066	1024	CIID	Normal	0.00645101	0.0531322	0.248526	0.310743	0.310062	0.0609115	0.00659176	0.0526745	0.24662	0.313125	0.310502	0.0603837
0.00605847	0.0483124	0.226268	0.318655	0.334249	0.0571191	1024	CIID	Anormal	0.00621382	0.0488501	0.229008	0.316813	0.3323	0.0573956	0.00599931	0.0397135	0.186995	0.352726	0.352879	0.0533729
0.00645802	0.0524709	0.245938	0.313725	0.310651	0.0606673	1024	CIID	Anormal	0.0063453	0.0525851	0.246218	0.313384	0.310697	0.0606818	0.0067687	0.0495805	0.228765	0.328849	0.317014	0.0593776
0.00634628	0.0525067	0.246257	0.313936	0.310114	0.0607374	1024	CIID	Normal	0.00630329	0.0525729	0.246361	0.313971	0.309986	0.0606999	0.00659609	0.0496661	0.232316	0.330794	0.311454	0.0594172
0.00639542	0.0529528	0.248476	0.310848	0.310218	0.0609393	1024	CIID	Normal	0.00636683	0.0530298	0.248551	0.31076	0.310142	0.0609787	0.00693581	0.0531461	0.246219	0.310607	0.313202	0.059801
0.00639948	0.0529807	0.248485	0.310548	0.31055	0.0608816	1024	CIID	Normal	0.00637732	0.0530179	0.248521	0.310498	0.31049	0.0609213	0.0068722	0.052902	0.244764	0.309848	0.315981	0.0595542
0.00647824	0.052979	0.24842	0.310805	0.310194	0.0609586	1024	CIID	Normal	0.00635408	0.0529866	0.248443	0.310877	0.310176	0.060998	0.00713922	0.0532221	0.246853	0.310647	0.311924	0.0600763
0.00651184	0.0529806	0.24852	0.310354	0.310588	0.0608897	1024	CIID	Normal	0.00649473	0.0530037	0.248591	0.310346	0.310475	0.0609275	0.00722228	0.0532489	0.246421	0.30944	0.313418	0.0601379
0.00659274	0.0529016	0.248395	0.311094	0.309751	0.0610819	1024	CIID	Normal	0.00640737	0.0529102	0.248515	0.311055	0.309827	0.061105	0.007587	0.053269	0.247669	0.311129	0.310105	0.0600876
0.00644091	0.0529414	0.248355	0.31123	0.309755	0.0610859	1024	CIID	Normal	0.00637578	0.0529413	0.248457	0.311184	0.309794	0.0610581	0.00703193	0.0535024	0.248987	0.31167	0.308393	0.0602339
0.00647169	0.0529484	0.248364	0.311161	0.30982	0.0610561	1024	CIID	Normal	0.00635907	0.0529525	0.248438	0.311067	0.309952	0.0610524	0.00716643	0.0531838	0.248462	0.311587	0.30924	0.060177
0.00640833	0.0529321	0.24842	0.310982	0.310006	0.0610754	1024	CIID	Anormal	0.00635533	0.0529329	0.248464	0.310952	0.310063	0.0610664	0.00710184	0.0536939	0.24789	0.310937	0.310123	0.0601055
0.00647705	0.0529035	0.248244	0.311123	0.309959	0.0611137	1024	CIID	Normal	0.00637444	0.052901	0.248275	0.310952	0.310154	0.0611634	0.00744491	0.0549247	0.252431	0.310958	0.304914	0.0590664
0.00650977	0.0533999	0.249948	0.310845	0.308347	0.0607382	1024	CIID	Normal	0.00638266	0.0531916	0.249361	0.31043	0.309428	0.0610219	0.00707035	0.0535768	0.250467	0.311988	0.306847	0.0598478
0.00667582	0.0528629	0.248425	0.311082	0.309763	0.0610163	1024	CIID	Anormal	0.00662841	0.0528779	0.248592	0.310777	0.309874	0.0610803	0.00738255	0.0527301	0.248179	0.311436	0.309542	0.0605427
0.0065542	0.0529141	0.248138	0.310877	0.310244	0.0610952	1024	CIID	Anormal	0.00658476	0.0529119	0.248117	0.310674	0.310442	0.0611073	0.00744108	0.0521646	0.243033	0.306194	0.320808	0.060304
0.00644525	0.0528594	0.248283	0.310974	0.310194	0.0610646	1024	CIID	Normal	0.0063749	0.0529374	0.2484	0.310919	0.310116	0.0610652	0.00717585	0.0525913	0.246207	0.309513	0.313971	0.0604358
0.00664261	0.0527779	0.247826	0.310394	0.310753	0.0614456	1024	CIID	Normal	0.00644098	0.0527662	0.247911	0.310127	0.311099	0.0614938	0.00732106	0.0516536	0.241451	0.303025	0.322421	0.0641294
0.00658158	0.0528037	0.247966	0.31052	0.310624	0.0613336	1024	CIID	Normal	0.00649233	0.0527774	0.247967	0.310305	0.310882	0.0614079	0.00705338	0.051836	0.241695	0.304157	0.321599	0.0636242
0.00649338	0.0529166	0.248373	0.311017	0.309979	0.0610397	1024	CIID	Normal	0.00638458	0.0529161	0.248385	0.310903	0.310136	0.0610968	0.00706101	0.0530217	0.247128	0.310816	0.311437	0.0604076
0.00644775	0.0527938	0.247794	0.310328	0.310998	0.0614698	1024	CIID	Normal	0.00636825	0.0527159	0.247783	0.310157	0.311294	0.0615275	0.00677789	0.0512816	0.240387	0.30352	0.323929	0.0641357
0.00646451	0.0527785	0.247656	0.310331	0.31114	0.0614686	1024	CIID	Normal	0.00644528	0.0527967	0.247871	0.310469	0.310828	0.06142	0.00755561	0.0510873	0.236641	0.300946	0.329672	0.064253
0.00642788	0.0527646	0.247785	0.310585	0.310898	0.0613857	1024	CIID	Normal	0.00631518	0.0527768	0.247854	0.310357	0.311121	0.0614286	0.00692014	0.0519413	0.243039	0.306282	0.319327	0.0624726
0.00664615	0.0535014	0.247626	0.311405	0.309674	0.0608955	1024	CIID	Normal	0.00707897	0.0535321	0.247297	0.315685	0.306308	0.0599045	0.00665182	0.0535412	0.24744	0.311249	0.309937	0.0609279
0.00645319	0.0529296	0.24811	0.310858	0.3105	0.060981	1024	CIEI	Anormal	0.00636636	0.0529741	0.248269	0.310878	0.310383	0.0609768	0.00686906	0.0528761	0.245745	0.312364	0.311906	0.0601602
0.00646093	0.0529224	0.248086	0.310337	0.311043	0.0609881	1024	CIEI	Normal	0.00646205	0.052981	0.248226	0.310601	0.310624	0.0609433	0.00707549	0.0524897	0.24412	0.309657	0.316307	0.0602801
0.00598031	0.0488522	0.229213	0.313628	0.335116	0.0577525	1024	CIEI	Anormal	0.0059591	0.0492205	0.230784	0.31293	0.333698	0.0578985	0.00572504	0.0413341	0.194407	0.344719	0.351036	0.0542281
0.00635874	0.0524884	0.245927	0.313786	0.310649	0.0606923	1024	CIEI	Anormal	0.00629161	0.0525727	0.246347	0.313456	0.310531	0.0606984	0.00651536	0.0496689	0.23094	0.32817	0.315527	0.0595156
0.0063254	0.052559	0.246243	0.313719	0.310344	0.0606933	1024	CIEI	Normal	0.00631806	0.0525817	0.246548	0.313492	0.310237	0.0607204	0.00663129	0.0499169	0.230949	0.333039	0.310667	0.0590383
0.0064028	0.0529495	0.24855	0.31088	0.310096	0.0609598	1024	CIEI	Normal	0.00638819	0.0529751	0.248586	0.310878	0.31001	0.0609831	0.006832	0.0530341	0.246816	0.310754	0.312499	0.0599646
0.00647373	0.0529756	0.248429	0.310569	0.310514	0.0608805	1024	CIEI	Normal	0.00649881	0.0530041	0.248499	0.310517	0.31041	0.0609176	0.00707385	0.0531749	0.246149	0.310249	0.313276	0.0599738
0.00644623	0.0529113	0.24831	0.310994	0.310124	0.0610448	1024	CIEI	Normal	0.0064029	0.053006	0.248523	0.310803	0.310126	0.0609721	0.00670642	0.0520546	0.245788	0.312844	0.312004	0.0605027
0.00641351	0.0529443	0.248531	0.310599	0.310394	0.0609578	1024	CIEI	Normal	0.00639794	0.0529681	0.248547	0.310592	0.310367	0.0609676	0.00686972	0.0530346	0.247454	0.310688	0.31166	0.0601715
0.00644549	0.0527863	0.248058	0.31048	0.310738	0.0613358	1024	CIEI	Normal	0.00638434	0.0528221	0.248172	0.310519	0.310605	0.0613281	0.00689363	0.0521422	0.242617	0.304407	0.320931	0.0630217
0.00642977	0.0529499	0.248295	0.311275	0.30977	0.0610917	1024	CIEI	Normal	0.00637838	0.0529808	0.24839	0.311212	0.309764	0.0610857	0.00704211	0.0533008	0.249293	0.311665	0.308197	0.060317
0.00648089	0.052951	0.248347	0.311159	0.309799	0.0610735	1024	CIEI	Normal	0.00647312	0.0529588	0.248476	0.31109	0.309735	0.0610879	0.00710962	0.0532101	0.249383	0.311794	0.308107	0.0602102
0.0064204	0.0528973	0.24836	0.31117	0.309904	0.0610758	1024	CIEI	Anormal	0.0063596	0.0529247	0.248421	0.31105	0.309998	0.0610813	0.00699842	0.0537228	0.249269	0.311498	0.308302	0.0600318
0.00660183	0.0529414	0.248318	0.310932	0.309887	0.0611361	1024	CIEI	Normal	0.00658876	0.0529193	0.248041	0.310775	0.310214	0.0612776	0.00739569	0.0544361	0.253156	0.311452	0.303968	0.0593429
0.006473	0.0539548	0.252005	0.31048	0.306561	0.0602989	1024	CIEI	Normal	0.0063861	0.0538157	0.251513	0.309925	0.307649	0.060498	0.00913857	0.0630224	0.246041	0.28006	0.325919	0.0651527
0.00659553	0.0528911	0.248223	0.310923	0.31015	0.0610502	1024	CIEI	Anormal	0.00642214	0.0528944	0.24834	0.310874	0.310228	0.061072	0.00751422	0.0521974	0.244745	0.308718	0.316443	0.0602924
0.00660817	0.0528734	0.248112	0.310848	0.310328	0.061051	1024	CIEI	Anormal	0.00644025	0.0529028	0.24815	0.310668	0.310578	0.0610851	0.00744743	0.0520653	0.242592	0.306017	0.321648	0.0601913
0.00653251	0.0528678	0.248277	0.310903	0.31019	0.0610519	1024	CIEI	Normal	0.00651914	0.0528831	0.248367	0.31092	0.310074	0.0610523	0.00724717	0.0527348	0.246549	0.309743	0.313251	0.0603566
0.00670673	0.0527987	0.247921	0.310478	0.310554	0.0613633	1024	CIEI	Normal	0.00665442	0.0527737	0.247936	0.310311	0.31077	0.0613932	0.00702379	0.0524159	0.244991	0.307341	0.315604	0.0625347
0.00640699	0.0528057	0.247885	0.310518	0.310854	0.0613605	1024	CIEI	Normal	0.0063947	0.0527865	0.247865	0.310178	0.311166	0.061451	0.00703577	0.0520279	0.243318	0.305553	0.318851	0.0631837
0.00642565	0.0528956	0.248425	0.311094	0.30992	0.0610604	1024	CIEI	Normal	0.00641775	0.0529287	0.248538	0.31095	0.309941	0.0610474	0.00693666	0.0528317	0.247718	0.311479	0.31055	0.0603467
0.00640191	0.0527585	0.247751	0.310464	0.310987	0.0614734	1024	CIEI	Normal	0.00636884	0.0527583	0.247763	0.310343	0.311104	0.0614969	0.00687364	0.0519106	0.243316	0.306486	0.318483	0.0629034
0.00640773	0.0527873	0.247793	0.310521	0.310922	0.0614061	1024	CIEI	Normal	0.00640279	0.0527654	0.247788	0.310414	0.311036	0.0614408	0.00692664	0.0515013	0.240351	0.303771	0.323667	0.063826
0.00642704	0.0527815	0.247847	0.310608	0.31076	0.0614041	1024	CIEI	Normal	0.00633936	0.0527806	0.247874	0.310359	0.311058	0.061429	0.00691535	0.0516538	0.242196	0.305553	0.320653	0.0630351
0.0064607	0.0534768	0.247671	0.311458	0.309803	0.0608829	1024	CIEI	Normal	0.00691928	0.0533969	0.24737	0.315857	0.306291	0.0599799	0.00649543	0.0535582	0.247571	0.31123	0.309989	0.0609128
0.00654244	0.0530767	0.247707	0.311448	0.310173	0.0608553	1024	CIEI	Normal	0.0069223	0.053239	0.24685	0.318102	0.305337	0.0594522	0.00659547	0.0531683	0.247402	0.311354	0.310453	0.0608319
0.00642166	0.0529759	0.248118	0.310872	0.310501	0.0609486	1024	CIED	Anormal	0.00641913	0.0529709	0.24826	0.310877	0.310369	0.0609403	0.00701894	0.0531255	0.246241	0.312387	0.311016	0.0600876
0.00642567	0.0530729	0.248464	0.310708	0.310223	0.0609295	1024	CIED	Normal	0.00634961	0.0531048	0.248569	0.310776	0.310124	0.0608956	0.0067978	0.0528611	0.247488	0.312611	0.309755	0.0603593
0.00606108	0.0487604	0.228597	0.316962	0.332654	0.0575568	1024	CIED	Anormal	0.00588487	0.0487273	0.228295	0.31708	0.33315	0.0574687	0.00590868	0.0414026	0.19464	0.345175	0.349926	0.0544926
0.00636575	0.052483	0.245945	0.313612	0.310824	0.060675	1024	CIED	Anormal	0.00637518	0.0525686	0.246278	0.313198	0.310736	0.060735	0.00665759	0.0505208	0.234673	0.32475	0.314071	0.0595509
0.00634179	0.0525787	0.246527	0.313766	0.310009	0.0606676	1024	CIED	Normal	0.00639628	0.0525788	0.246717	0.313588	0.309918	0.06069	0.00671605	0.0502888	0.235329	0.329614	0.309102	0.0591461
0.00638495	0.0530019	0.248349	0.31083	0.310316	0.0609468	1024	CIED	Normal	0.00638005	0.0529789	0.248493	0.31075	0.310273	0.0609556	0.00684802	0.0530993	0.246858	0.310263	0.312789	0.0600402
0.00635442	0.0529798	0.248587	0.310462	0.310568	0.060884	1024	CIED	Normal	0.00631983	0.053009	0.248575	0.310548	0.310459	0.0609232	0.00668984	0.0530053	0.246763	0.310227	0.313149	0.0600558
0.00643635	0.0530069	0.248435	0.310859	0.310185	0.0609183		CIED	Normal	0.00634219	0.0530172	0.248479	0.310793	0.310207	0.0609899	0.00704584	0.0531024	0.24639	0.310673	0.312767	0.0599129
0.00651732	0.0529539	0.248407	0.310482	0.310602	0.0608714		CIED	Normal	0.00635794	0.0529705	0.248585	0.310492	0.310504	0.060924	0.00720003	0.0532551	0.246783	0.309748	0.312741	0.0601368
0.00644285	0.0528941	0.248387	0.31114	0.309833	0.0611321		CIED	Normal	0.00641469	0.0529385	0.248588	0.310949	0.309782	0.0611503	0.00713442	0.0531482	0.248902	0.310858	0.309431	0.0603477
0.00640709	0.0529427	0.248349	0.311232	0.309768	0.0611222		CIED	Normal	0.00639057	0.0529757	0.248405	0.31113	0.309839	0.0610835	0.00703598	0.0534544	0.249211	0.311609	0.308329	0.0601786
0.00648602	0.0529098	0.24839	0.311134	0.309831	0.0610695		CIED	Normal	0.00633637	0.0529547	0.248506	0.311071	0.309862	0.0610929	0.00701802	0.0532222	0.248749	0.311395	0.309097	0.0603307
0.00640602	0.0529033	0.248398	0.311028	0.310001	0.0610922		CIED	Anormal	0.00635824	0.0529466	0.248448	0.310976	0.31002	0.0610731	0.00717017	0.0539208	0.247762	0.31111	0.309897	0.059979
0.00642608	0.0529219	0.24824	0.311034	0.310026	0.0611691		CIED	Normal	0.0063856	0.052879	0.248214	0.310964	0.310193	0.0611849	0.00734189	0.0546735	0.252091	0.310528	0.305946	0.0591722
0.0064179	0.0532686	0.249646	0.310813	0.308819	0.0608414		CIED	Normal	0.00638054	0.0531335	0.249106	0.310392	0.309682	0.0611149	0.0070182	0.0536378	0.250963	0.311936	0.306471	0.0597768
0.0066009	0.0528594	0.248431	0.311021	0.309865	0.0610466		CIED	Anormal	0.00647223	0.0529214	0.248502	0.310831	0.310013	0.0610995	0.00702992	0.0527192	0.248019	0.31095	0.310364	0.0607357
0.00654825	0.052891	0.24813	0.310965	0.310236	0.0610603		CIED	Anormal	0.00649485	0.052927	0.248207	0.310664	0.310472	0.0610597	0.00765215	0.0525586	0.245302	0.307507	0.316302	0.0605333
0.00642546	0.0529094	0.248272	0.310985	0.31019	0.0610399		CIED	Normal	0.006391	0.05291	0.24845	0.310956	0.31008	0.0610315	0.00697511	0.0523092	0.243806	0.307667	0.318661	0.0605338
0.00653095	0.0528265	0.247874	0.310477	0.310733	0.0613862		CIED	Normal	0.00656799	0.0527693	0.247892	0.310168	0.310987	0.0614551	0.0071437	0.0520877	0.243371	0.305077	0.318983	0.0632756
0.00642321	0.0528315	0.248025	0.310549	0.310664	0.0613343		CIED	Normal	0.00637129	0.0527654	0.247965	0.310346	0.310994	0.061392	0.0070779	0.0522409	0.244146	0.305999	0.317543	0.0629174
0.00642409	0.0528799	0.248357	0.311094	0.309997	0.0610655		CIED	Normal	0.00637688	0.0529109	0.248498	0.310869	0.310103	0.0610657	0.00709796	0.0530456	0.246777	0.310551	0.312006	0.0603952
0.00649424	0.0527859	0.247848	0.310424	0.310877	0.0614093		CIED	Normal	0.00641479	0.0527711	0.247765	0.310221	0.311202	0.0614746	0.00701762	0.0521892	0.243554	0.306054	0.318172	0.0629434
0.00646041	0.0527366	0.247765	0.310426	0.311034	0.0614148		CIED	Normal	0.00644686	0.0527664	0.247749	0.310173	0.311219	0.0614851	0.0069287	0.0518119	0.242575	0.305265	0.320165	0.063241
0.00653063	0.0527471	0.247676	0.310474	0.311036	0.0613939		CIED	Normal	0.00644114	0.0527663	0.247793	0.310287	0.311096	0.0614586	0.00714603	0.0515961	0.241613	0.304519	0.322011	0.0631586
0.00651285	0.0534185	0.247715	0.311515	0.309686	0.0609203		CIED	Normal	0.00691931	0.0534559	0.24681	0.316179	0.306524	0.0599434	0.00644099	0.0535097	0.247547	0.311305	0.309973	0.0609837

## Sheet: 2048
0.00638194	0.0549731	0.248806	0.310645	0.312194	0.0619195	2048	CIED	Anormal	0.00635965	0.0549683	0.248948	0.310652	0.312071	0.061916	0.00692374	0.0551426	0.247074	0.312014	0.312736	0.0610494
0.00637665	0.0550709	0.249108	0.310529	0.311912	0.0619072	2048	CIED	Normal	0.00631748	0.0551062	0.249202	0.3106	0.311807	0.0618691	0.00662908	0.0548421	0.248237	0.31239	0.311516	0.0613233
0.00596561	0.0506227	0.229283	0.316628	0.334192	0.0585977	2048	CIED	Anormal	0.00585063	0.0505909	0.228925	0.316729	0.334695	0.058505	0.00582241	0.0430564	0.194703	0.344671	0.351938	0.055612
0.00632112	0.0544642	0.246587	0.313366	0.312572	0.0616429	2048	CIED	Anormal	0.00631568	0.0545499	0.24693	0.312959	0.312487	0.0617016	0.0066156	0.0524571	0.235488	0.324212	0.31584	0.0604933
0.00630642	0.0545647	0.247126	0.313547	0.311752	0.061644	2048	CIED	Normal	0.0063261	0.054559	0.247344	0.313371	0.311671	0.0616699	0.00665185	0.0522114	0.23609	0.329141	0.310908	0.0600906
0.00635618	0.0549947	0.248989	0.310611	0.312044	0.0619174	2048	CIED	Normal	0.00633287	0.0549814	0.249132	0.310534	0.312007	0.0619247	0.00685824	0.0550906	0.247578	0.309979	0.314456	0.060984
0.00632843	0.0549683	0.249168	0.310311	0.312271	0.0618674	2048	CIED	Normal	0.00629414	0.055006	0.249161	0.310374	0.312167	0.061905	0.00673193	0.0550005	0.247449	0.309935	0.314822	0.0610017
0.00638034	0.0549938	0.249087	0.31066	0.3119	0.0618907	2048	CIED	Normal	0.00630805	0.0550104	0.249129	0.310566	0.31193	0.0619696	0.00698777	0.0550913	0.247127	0.310402	0.314471	0.0608617
0.00642793	0.0549658	0.248997	0.310372	0.312292	0.0618534	2048	CIED	Normal	0.00632811	0.0549684	0.249168	0.310337	0.312206	0.0619008	0.00706773	0.0552747	0.247487	0.309525	0.314478	0.0610922
0.00639256	0.0548799	0.249104	0.310871	0.311572	0.062099	2048	CIED	Normal	0.00637467	0.0549304	0.24929	0.310681	0.311529	0.0621119	0.00710679	0.0551578	0.249661	0.310566	0.311121	0.0613
0.00636611	0.0549341	0.249082	0.31094	0.31151	0.062082	2048	CIED	Normal	0.00634047	0.0549633	0.249144	0.310849	0.311572	0.062051	0.00705484	0.0554816	0.249961	0.311284	0.310006	0.0611182
0.00640966	0.0549027	0.249123	0.31087	0.311574	0.0620354	2048	CIED	Normal	0.00630813	0.0549392	0.249214	0.3108	0.3116	0.0620524	0.00705889	0.0552534	0.24949	0.311068	0.310765	0.0612703
0.00637376	0.0548866	0.249093	0.310771	0.311736	0.0620539	2048	CIED	Anormal	0.00632799	0.0549399	0.249126	0.310726	0.311757	0.062037	0.00723229	0.055967	0.248475	0.310801	0.311525	0.0609119
0.00638798	0.054908	0.248963	0.310753	0.311768	0.0621294	2048	CIED	Normal	0.00634572	0.0548657	0.24894	0.310687	0.311925	0.0621545	0.00740557	0.0567956	0.252835	0.310197	0.307535	0.0600992
0.0063698	0.0552649	0.250413	0.310522	0.310545	0.0617985	2048	CIED	Normal	0.0063301	0.055126	0.249855	0.310105	0.311417	0.0620734	0.0070175	0.0556788	0.251724	0.311626	0.30814	0.0607126
0.00651554	0.0548431	0.249145	0.310776	0.311617	0.0620204	2048	CIED	Anormal	0.00641371	0.0548951	0.249174	0.310593	0.311769	0.0620795	0.00694099	0.0547036	0.248788	0.310684	0.312108	0.0616883
0.00645109	0.0548845	0.248867	0.310704	0.311984	0.0620258	2048	CIED	Anormal	0.00640285	0.0549134	0.248915	0.310417	0.312239	0.0620207	0.00741571	0.0545511	0.246091	0.307288	0.318078	0.0614999
0.00637677	0.0548962	0.248997	0.310712	0.311928	0.0620026	2048	CIED	Normal	0.00634461	0.0549053	0.249141	0.310685	0.311828	0.0619998	0.00696524	0.0542912	0.244537	0.30736	0.320348	0.0614697
0.00642702	0.054814	0.248602	0.310225	0.312492	0.0623538	2048	CIED	Normal	0.00642762	0.0547666	0.248584	0.309952	0.312762	0.0624345	0.00704316	0.0540713	0.244105	0.304812	0.320682	0.0642489
0.00637881	0.0548213	0.248737	0.310286	0.312394	0.0623002	2048	CIED	Normal	0.00633313	0.0547511	0.24866	0.310088	0.31272	0.0623652	0.00698013	0.0542242	0.244894	0.30572	0.319255	0.0638883
0.00637796	0.0548762	0.249054	0.310831	0.31173	0.0620376	2048	CIED	Normal	0.00634026	0.054901	0.249165	0.310635	0.311839	0.0620341	0.00709021	0.0550439	0.247493	0.310273	0.313692	0.061344
0.00641261	0.0547772	0.248572	0.310163	0.312624	0.0623744	2048	CIED	Normal	0.00635059	0.0547543	0.248457	0.309961	0.312966	0.0624408	0.00702227	0.054195	0.244264	0.305753	0.319834	0.0638951
0.00639297	0.0547215	0.248502	0.310146	0.312787	0.0623753	2048	CIED	Normal	0.00636738	0.054758	0.248459	0.30991	0.312976	0.0624508	0.00690097	0.053781	0.243321	0.304966	0.321824	0.0641905
0.00643156	0.0547156	0.248422	0.310216	0.312779	0.0623639	2048	CIED	Normal	0.00637139	0.0547527	0.248504	0.310026	0.312839	0.0624283	0.00709413	0.0535744	0.242346	0.304221	0.323669	0.0641108
0.0064293	0.0554106	0.24853	0.311205	0.311417	0.0618833	2048	CIED	Normal	0.00682557	0.0554463	0.247635	0.315856	0.308243	0.0608963	0.00638729	0.0555032	0.248358	0.31097	0.311704	0.0619446
0.00639195	0.0549226	0.24882	0.310627	0.312206	0.0619472	2048	CIEI	Anormal	0.0063262	0.0549615	0.248959	0.310649	0.312093	0.0619378	0.00679497	0.0548844	0.246567	0.311986	0.313608	0.0611151
0.00639088	0.0549202	0.248744	0.310138	0.312758	0.0619647	2048	CIEI	Normal	0.0063756	0.054978	0.248902	0.310389	0.312354	0.0619128	0.00709093	0.0544945	0.244841	0.309345	0.317963	0.0612233
0.00593244	0.0507251	0.229941	0.313312	0.336603	0.0587575	2048	CIEI	Anormal	0.00591041	0.0511023	0.231489	0.312633	0.335204	0.0589045	0.00574572	0.042978	0.194236	0.344214	0.353221	0.0553532
0.0063154	0.0544629	0.246606	0.313517	0.31239	0.0616607	2048	CIEI	Anormal	0.00626506	0.0545473	0.247002	0.313206	0.312263	0.0616633	0.00653075	0.0515801	0.231748	0.327558	0.317308	0.0604416
0.0062976	0.0545391	0.246842	0.313509	0.31208	0.0616647	2048	CIEI	Normal	0.00628018	0.0545647	0.247136	0.313283	0.311979	0.0616997	0.00668841	0.0518431	0.231672	0.332436	0.31248	0.0599905
0.00636396	0.0549478	0.249182	0.31066	0.311821	0.0619377	2048	CIEI	Normal	0.00633995	0.0549692	0.249242	0.310658	0.311748	0.0619496	0.00681363	0.0550192	0.247566	0.31047	0.314174	0.0609063
0.00639648	0.0549756	0.249028	0.310426	0.312222	0.061864	2048	CIEI	Normal	0.00639599	0.0550075	0.249101	0.310369	0.312142	0.0619007	0.00703499	0.0551926	0.24685	0.309979	0.314961	0.0609237
0.00636615	0.054897	0.248994	0.31077	0.311865	0.0620228	2048	CIEI	Normal	0.00634663	0.0550153	0.249175	0.310582	0.311855	0.061943	0.0067366	0.0539969	0.246519	0.312529	0.313718	0.0614499
0.00635591	0.0549505	0.249125	0.310448	0.312091	0.0619422	2048	CIEI	Normal	0.00634497	0.0549621	0.249149	0.310423	0.312083	0.0619488	0.00685186	0.0550298	0.24815	0.310414	0.313361	0.0611277
0.00639045	0.0547722	0.248767	0.31022	0.312476	0.0622991	2048	CIEI	Normal	0.0063427	0.0548182	0.24886	0.310262	0.312341	0.0622995	0.00695293	0.0541362	0.243339	0.304086	0.322535	0.0639548
0.0063792	0.0549323	0.249044	0.310989	0.311507	0.0620562	2048	CIEI	Normal	0.00633567	0.0549692	0.249132	0.310931	0.311503	0.0620395	0.00697232	0.0553065	0.250079	0.311372	0.309915	0.0612628
0.00640679	0.0549463	0.249092	0.310884	0.311543	0.0620384	2048	CIEI	Normal	0.00638712	0.0549484	0.249217	0.310826	0.311481	0.0620522	0.00705524	0.0552306	0.250148	0.311501	0.309818	0.0611553
0.00637403	0.0548882	0.249064	0.31091	0.311643	0.0620394	2048	CIEI	Anormal	0.00632106	0.054911	0.249118	0.31079	0.311735	0.0620473	0.00703954	0.0557503	0.250002	0.31118	0.309971	0.0609669
0.00647375	0.0549272	0.249102	0.310664	0.311644	0.0621036	2048	CIEI	Normal	0.00644879	0.0549138	0.248824	0.310503	0.31198	0.0622457	0.00731593	0.0565136	0.253948	0.311165	0.305659	0.0602703
0.00641984	0.0559838	0.252773	0.310191	0.308279	0.0612469	2048	CIEI	Normal	0.00634838	0.0558376	0.252248	0.309647	0.309371	0.0614448	0.00908772	0.0656312	0.245884	0.279828	0.327886	0.0663206
0.00647775	0.0548763	0.248971	0.310661	0.311907	0.0620215	2048	CIEI	Anormal	0.00635614	0.0548803	0.24905	0.310612	0.311978	0.0620419	0.00733698	0.0541881	0.245514	0.308476	0.3182	0.0612382
0.00647942	0.0548651	0.24884	0.31061	0.312092	0.0620256	2048	CIEI	Anormal	0.00636812	0.0548907	0.248841	0.310421	0.31233	0.0620568	0.00736963	0.0540983	0.243326	0.305721	0.323316	0.0611399
0.00643426	0.0548548	0.249008	0.310651	0.311936	0.0620261	2048	CIEI	Normal	0.00640754	0.0548765	0.249077	0.310685	0.311844	0.0620179	0.0071198	0.0547358	0.247308	0.309481	0.314983	0.0613123
0.00652344	0.0547962	0.248678	0.310249	0.312334	0.0623313	2048	CIEI	Normal	0.00648037	0.0547621	0.248651	0.310099	0.312551	0.0623729	0.00696492	0.0544023	0.24573	0.30707	0.317295	0.063493
0.00636157	0.0547894	0.248608	0.310248	0.312583	0.062328	2048	CIEI	Normal	0.00634014	0.0547704	0.248557	0.309934	0.3129	0.0624158	0.00696582	0.0540069	0.244059	0.305281	0.32053	0.0641416
0.00637601	0.0548869	0.249122	0.310838	0.311658	0.0620261	2048	CIEI	Normal	0.00636384	0.0549161	0.24922	0.31071	0.311684	0.0620181	0.00694062	0.0548296	0.24844	0.311178	0.312237	0.0613006
0.0063646	0.054739	0.24849	0.310167	0.312721	0.0624422	2048	CIEI	Normal	0.00632028	0.05474	0.248495	0.310057	0.312842	0.0624648	0.0069184	0.0538881	0.244034	0.306153	0.320123	0.0638607
0.0063702	0.0547614	0.248531	0.310235	0.312659	0.0623677	2048	CIEI	Normal	0.00634364	0.0547503	0.248503	0.310146	0.312775	0.062412	0.00694707	0.0534639	0.241076	0.303455	0.32529	0.0647833
0.00637377	0.0547608	0.248589	0.310323	0.312509	0.0623627	2048	CIEI	Normal	0.00630893	0.0547662	0.248592	0.310072	0.312793	0.0623957	0.00696291	0.053642	0.242907	0.305221	0.322277	0.0639919
0.00641562	0.055459	0.248484	0.311128	0.311534	0.0618393	2048	CIEI	Normal	0.00683914	0.055401	0.248181	0.315538	0.30802	0.0609246	0.0064251	0.0555627	0.248383	0.310903	0.311715	0.0618742
0.00643176	0.0550632	0.248521	0.311148	0.311908	0.0618202	2048	CIEI	Normal	0.00674759	0.0552237	0.247701	0.317804	0.30707	0.0603993	0.00645523	0.0551496	0.248226	0.311068	0.312203	0.0617895
0.00638745	0.054931	0.248727	0.310692	0.312275	0.0618989	2048	CIID	Anormal	0.00632147	0.0549892	0.248922	0.310626	0.312108	0.0619471	0.00688969	0.0549901	0.246375	0.311898	0.313676	0.061112
0.00641703	0.055115	0.248987	0.310541	0.311954	0.0618863	2048	CIID	Normal	0.00637047	0.0551308	0.249161	0.310575	0.311773	0.061896	0.00650495	0.0546473	0.247365	0.312851	0.312238	0.0613421
0.00593827	0.0501716	0.226973	0.318294	0.335805	0.0581522	2048	CIID	Anormal	0.00603341	0.0507314	0.229749	0.316469	0.333873	0.0584352	0.00589606	0.0412922	0.18633	0.352513	0.35535	0.0545043
0.00636899	0.0544453	0.246596	0.313484	0.312416	0.0616363	2048	CIID	Anormal	0.00629514	0.0545554	0.246872	0.313138	0.312444	0.0616473	0.00672031	0.0515089	0.229603	0.328202	0.318822	0.0603148
0.00630593	0.0544892	0.246866	0.313723	0.311849	0.0617089	2048	CIID	Normal	0.00626524	0.0545482	0.246952	0.313763	0.311735	0.061668	0.00658374	0.051559	0.233062	0.330279	0.313277	0.0603565
0.00635879	0.0549484	0.249115	0.310641	0.311936	0.0619135	2048	CIID	Normal	0.00632354	0.0550242	0.249196	0.310539	0.311873	0.0619533	0.00691183	0.0551361	0.246961	0.310332	0.314861	0.0607481
0.00635867	0.0549772	0.249052	0.310402	0.312251	0.0618686	2048	CIID	Normal	0.00633327	0.0550231	0.249107	0.31034	0.3122	0.061904	0.00690911	0.054891	0.245464	0.309561	0.31764	0.0604881
0.00640197	0.0549799	0.249064	0.310595	0.31194	0.0619334	2048	CIID	Normal	0.00631834	0.0549814	0.249073	0.310659	0.311912	0.0619686	0.00704653	0.0552314	0.24759	0.310388	0.313651	0.0610224
0.00642405	0.0549861	0.249085	0.310251	0.312285	0.061879	2048	CIID	Normal	0.00639894	0.0550076	0.249168	0.31024	0.312174	0.0619196	0.00710623	0.0552675	0.24711	0.309213	0.315135	0.0611056
0.00646744	0.0548963	0.24913	0.310846	0.311521	0.0620501	2048	CIID	Normal	0.00635273	0.0549074	0.249227	0.310796	0.311566	0.0620671	0.0074927	0.0553394	0.248422	0.310852	0.311776	0.0610385
0.00638913	0.054926	0.249104	0.310946	0.311495	0.0620496	2048	CIID	Normal	0.00633334	0.054931	0.249194	0.310897	0.311534	0.0620181	0.00703437	0.0555213	0.249752	0.311352	0.310076	0.061173
0.0064097	0.0549324	0.249094	0.310893	0.311562	0.0620247	2048	CIID	Normal	0.00632703	0.0549483	0.249146	0.310791	0.311688	0.0620147	0.00717447	0.0552411	0.249205	0.311259	0.310903	0.0611175
0.00637603	0.054925	0.249112	0.310726	0.311741	0.0620381	2048	CIID	Anormal	0.006327	0.0549201	0.249137	0.310704	0.311801	0.0620285	0.00716703	0.0557427	0.248599	0.310615	0.311757	0.0610397
0.00641258	0.0548903	0.24899	0.310843	0.311704	0.062073	2048	CIID	Normal	0.00633333	0.054886	0.249014	0.310661	0.311883	0.0621321	0.00752775	0.0570596	0.253164	0.310612	0.306507	0.0599855
0.00643946	0.0554035	0.250728	0.310553	0.310081	0.061692	2048	CIID	Normal	0.00633278	0.0551849	0.250112	0.310141	0.311152	0.061986	0.00709197	0.0556296	0.251228	0.311662	0.308504	0.0607799
0.00655179	0.0548505	0.249137	0.310856	0.311522	0.0619975	2048	CIID	Anormal	0.00649173	0.0548696	0.249286	0.310568	0.311646	0.0620575	0.00716093	0.0547206	0.248967	0.311212	0.311332	0.0615182
0.00644761	0.0549039	0.248857	0.310635	0.312009	0.0620608	2048	CIID	Anormal	0.00644413	0.0549054	0.248837	0.310439	0.312213	0.0620842	0.00731099	0.0541615	0.243786	0.305928	0.322521	0.061259
0.00639218	0.0548409	0.249007	0.3107	0.311933	0.0620307	2048	CIID	Normal	0.00632954	0.0549247	0.2491	0.310659	0.311863	0.0620279	0.00703328	0.0545841	0.24697	0.309254	0.31572	0.0613818
0.00649463	0.054761	0.248561	0.310161	0.312519	0.0624224	2048	CIID	Normal	0.00636021	0.0547543	0.248587	0.309893	0.312845	0.0624781	0.00711801	0.0536127	0.242228	0.302787	0.324147	0.0651101
0.00646266	0.0547947	0.2487	0.310273	0.312382	0.0623049	2048	CIID	Normal	0.00639038	0.0547648	0.248671	0.310079	0.312624	0.0623799	0.00700765	0.0537936	0.242443	0.303873	0.323276	0.064591
0.00641798	0.0549157	0.249079	0.310767	0.311722	0.062008	2048	CIID	Normal	0.00633417	0.0549092	0.249064	0.310669	0.311875	0.0620575	0.00702791	0.0550264	0.247849	0.310532	0.313131	0.0613605
0.00638439	0.0547818	0.248513	0.310052	0.312752	0.0624339	2048	CIID	Normal	0.00632543	0.0546969	0.248472	0.309898	0.313031	0.0624998	0.00682601	0.0532426	0.24109	0.303194	0.325571	0.0650914
0.00641216	0.0547588	0.24839	0.310054	0.312874	0.0624366	2048	CIID	Normal	0.00637094	0.0547911	0.2486	0.310198	0.312579	0.0623795	0.00751765	0.0530524	0.237375	0.300654	0.331271	0.0651976
0.00637617	0.0547471	0.248515	0.310306	0.312634	0.0623462	2048	CIID	Normal	0.00629167	0.0547553	0.248558	0.310076	0.312856	0.0623915	0.00696675	0.0539347	0.243755	0.305954	0.320955	0.0634199
0.00649843	0.0554982	0.248464	0.311103	0.311439	0.061857	2048	CIID	Normal	0.00691985	0.0555436	0.24813	0.315392	0.308045	0.0608605	0.00650795	0.0555346	0.248277	0.310952	0.311694	0.061894
0.00636249	0.0548979	0.248814	0.310778	0.312157	0.0619073	2048	CIII	Anormal	0.00631719	0.0549569	0.24893	0.310626	0.312139	0.0619466	0.00690815	0.054722	0.244771	0.312776	0.314854	0.0609435
0.00595445	0.050979	0.231042	0.311854	0.335464	0.059939	2048	CIII	Normal	0.00590686	0.0512594	0.232206	0.311376	0.334412	0.0600544	0.00590688	0.0437554	0.198653	0.336498	0.353233	0.0575887
0.00589329	0.0507234	0.229996	0.31353	0.336502	0.0586198	2048	CIII	Anormal	0.00590893	0.0510462	0.231094	0.312726	0.335807	0.0586638	0.00565482	0.0442033	0.200545	0.335785	0.353201	0.0562976
0.00634793	0.0544885	0.246803	0.313224	0.312403	0.0616821	2048	CIII	Anormal	0.00629414	0.0545934	0.247144	0.312854	0.312348	0.0617061	0.00660739	0.0525906	0.235142	0.327262	0.313562	0.0599507
0.00628917	0.0546108	0.247436	0.312727	0.312122	0.0617548	2048	CIII	Normal	0.0062737	0.0546164	0.247406	0.312802	0.312099	0.0617375	0.00655559	0.0517726	0.235844	0.327691	0.312765	0.0604805
0.00638788	0.055022	0.249117	0.310631	0.311838	0.0619201	2048	CIII	Normal	0.00635492	0.0550207	0.249164	0.310662	0.311737	0.0619713	0.00680316	0.0551101	0.24799	0.310419	0.31353	0.061095
0.00637154	0.0549694	0.249117	0.310286	0.31233	0.0618347	2048	CIII	Normal	0.00631744	0.0549862	0.249178	0.310247	0.312268	0.0619164	0.00694672	0.0550184	0.245725	0.309397	0.317146	0.060717
0.00635847	0.0549657	0.24903	0.310627	0.311972	0.0619608	2048	CIII	Normal	0.00630261	0.0549779	0.249114	0.31063	0.311922	0.0619735	0.00693384	0.0552564	0.247596	0.310942	0.313189	0.0610146
0.00640528	0.0549938	0.249102	0.310435	0.312091	0.0618902	2048	CIII	Normal	0.00638779	0.0549924	0.249118	0.310502	0.311988	0.0619249	0.0071538	0.055225	0.247546	0.310058	0.313911	0.0610405
0.00638085	0.054814	0.248856	0.310476	0.312232	0.0621622	2048	CIII	Normal	0.00631615	0.0548381	0.248978	0.310548	0.3121	0.0621374	0.00673939	0.0546178	0.24722	0.308002	0.316076	0.0623097
0.00641252	0.054904	0.249104	0.310894	0.311536	0.0620686	2048	CIII	Normal	0.00639176	0.0549421	0.249105	0.31091	0.311524	0.062043	0.00699203	0.0553446	0.249827	0.311309	0.310078	0.0613657
0.00637327	0.054913	0.24911	0.310905	0.311548	0.0620615	2048	CIII	Normal	0.00632825	0.0549245	0.249226	0.310884	0.311514	0.0620367	0.00686108	0.05512	0.25014	0.311618	0.309921	0.0612519
0.0064045	0.0549102	0.249055	0.310842	0.311679	0.0620292	2048	CIII	Anormal	0.00640647	0.0549232	0.249065	0.310667	0.311799	0.0620553	0.00720124	0.055661	0.249623	0.31111	0.310476	0.0608436
0.00645067	0.0550079	0.249236	0.310635	0.311519	0.0620669	2048	CIII	Normal	0.00644847	0.0549794	0.249138	0.310444	0.311765	0.062129	0.00769575	0.0569724	0.25477	0.311595	0.303883	0.0599274
0.0064279	0.0564004	0.254308	0.310032	0.306828	0.0608916	2048	CIII	Normal	0.00630823	0.0557033	0.252057	0.309735	0.309603	0.0615017	0.00693148	0.0547482	0.249339	0.312688	0.309864	0.0613574
0.0063939	0.0548417	0.249011	0.310726	0.31189	0.0620606	2048	CIII	Anormal	0.00639495	0.0548985	0.249031	0.310632	0.311876	0.062076	0.00726427	0.0546544	0.24702	0.309842	0.314829	0.0613211
0.00646162	0.0548576	0.248909	0.310616	0.312054	0.0620165	2048	CIII	Anormal	0.00633627	0.0548909	0.248934	0.31038	0.312318	0.0620558	0.00722195	0.0541132	0.24449	0.306535	0.321209	0.0613996
0.00637398	0.0548916	0.248983	0.310805	0.31182	0.0620309	2048	CIII	Normal	0.00636171	0.0549335	0.249174	0.310646	0.311792	0.0620077	0.00715154	0.0548609	0.24764	0.309998	0.314132	0.0611465
0.0064166	0.0547986	0.248796	0.310455	0.31218	0.062265	2048	CIII	Normal	0.00634084	0.0548113	0.248787	0.310347	0.312314	0.0623117	0.00683962	0.0544706	0.247075	0.308614	0.314904	0.0630556
0.00639945	0.0548109	0.248653	0.310361	0.312398	0.0622818	2048	CIII	Normal	0.00641794	0.0547989	0.248603	0.310088	0.312628	0.0623807	0.00704455	0.0542735	0.245762	0.306896	0.317636	0.063338
0.00642583	0.0549005	0.249109	0.310818	0.31164	0.0620062	2048	CIII	Normal	0.00638774	0.0548914	0.249242	0.310726	0.311641	0.0620199	0.00702363	0.055011	0.248769	0.311349	0.311497	0.0612687
0.00637705	0.0547342	0.248555	0.310337	0.312552	0.0623658	2048	CIII	Normal	0.00635	0.0547501	0.248547	0.310152	0.312695	0.0624292	0.00696704	0.0540463	0.244714	0.306805	0.318978	0.0634602
0.00640395	0.0547707	0.248627	0.310311	0.31246	0.0623401	2048	CIII	Normal	0.00636013	0.0548091	0.24855	0.310151	0.312646	0.0623987	0.00706521	0.0540408	0.244821	0.306319	0.318947	0.0637776
0.0064143	0.0547935	0.248574	0.310389	0.312412	0.0623356	2048	CIII	Normal	0.00633967	0.0547431	0.248586	0.31022	0.312664	0.0623761	0.00704709	0.0537651	0.243236	0.305647	0.321499	0.0637971
0.00645536	0.0554788	0.24857	0.311068	0.311422	0.0618642	2048	CIII	Normal	0.00698544	0.0555752	0.247739	0.31547	0.308251	0.0608829	0.00651756	0.0555396	0.248258	0.310868	0.311732	0.0619315
0.00635837	0.0550835	0.248443	0.311239	0.311938	0.061828	2048	CIII	Normal	0.00685684	0.0550323	0.246628	0.31909	0.306893	0.0604361	0.00639175	0.055128	0.248305	0.311051	0.312203	0.0618088
0.00639745	0.0549567	0.248804	0.310631	0.312217	0.0619089	2048	CSED	Anormal	0.0063734	0.0549948	0.248939	0.310661	0.312018	0.0619328	0.00689063	0.0552189	0.247168	0.311866	0.312773	0.0610223
0.00642246	0.0549242	0.248822	0.310411	0.312394	0.0619481	2048	CSED	Normal	0.00630327	0.0549443	0.249015	0.310443	0.31226	0.0619473	0.00714532	0.0549171	0.24578	0.309176	0.316632	0.0612908
0.00599925	0.0503059	0.227759	0.317152	0.335744	0.0583538	2048	CSED	Anormal	0.00591824	0.0505878	0.229087	0.316566	0.334621	0.058513	0.00588864	0.042611	0.191627	0.345377	0.354769	0.0555264
0.00638164	0.0544814	0.246507	0.313427	0.312525	0.0616297	2048	CSED	Anormal	0.0062843	0.0545542	0.24698	0.313113	0.312329	0.0616842	0.00675727	0.0525278	0.234571	0.325855	0.31519	0.0602129
0.00631561	0.0546191	0.247336	0.313356	0.311637	0.061684	2048	CSED	Normal	0.00629714	0.0546024	0.247454	0.313241	0.311644	0.0617105	0.00664859	0.0524509	0.235653	0.329974	0.310611	0.0597786
0.00640923	0.0549343	0.249074	0.310574	0.311985	0.06193	2048	CSED	Normal	0.00632369	0.0550015	0.249169	0.310585	0.31191	0.0619206	0.00682695	0.0551348	0.24816	0.310049	0.313773	0.0610019
0.00639223	0.0550017	0.249004	0.310453	0.312154	0.0619138	2048	CSED	Normal	0.00631293	0.0550277	0.249121	0.310343	0.312175	0.0619329	0.00693439	0.0547751	0.247843	0.310777	0.313796	0.0608238
0.00638442	0.0550083	0.249031	0.310647	0.311935	0.0619081	2048	CSED	Normal	0.0063445	0.055014	0.249163	0.310588	0.311822	0.0619823	0.00688652	0.0552726	0.24835	0.310619	0.312765	0.0610297
0.00637852	0.0549695	0.249034	0.310364	0.312294	0.0618805	2048	CSED	Normal	0.00634375	0.0549866	0.249162	0.31032	0.312192	0.0619138	0.00691977	0.0553173	0.247717	0.309531	0.314408	0.0610399
0.00641348	0.0548975	0.249186	0.310864	0.311496	0.0620525	2048	CSED	Normal	0.00634142	0.0549073	0.249225	0.310869	0.311502	0.062067	0.00695974	0.0554343	0.250027	0.310617	0.310557	0.0613096
0.0064082	0.0549536	0.249092	0.31092	0.311519	0.0620256	2048	CSED	Normal	0.0063504	0.05496	0.249141	0.310878	0.311535	0.0620504	0.00714246	0.0555274	0.249978	0.311119	0.310018	0.061112
0.00639527	0.0549527	0.249108	0.310821	0.311631	0.0620066	2048	CSED	Normal	0.0063552	0.0549486	0.249146	0.310772	0.311652	0.0620422	0.00726468	0.0552542	0.248871	0.310925	0.311421	0.0611733
0.00636795	0.0549215	0.249114	0.310825	0.3117	0.0619917	2048	CSED	Anormal	0.00633982	0.0549043	0.249143	0.310711	0.31178	0.0620351	0.00723054	0.0558699	0.249642	0.310858	0.310305	0.0610045
0.00640443	0.0549116	0.249065	0.310795	0.31169	0.0620457	2048	CSED	Normal	0.00634662	0.0549105	0.24902	0.310676	0.311856	0.0621062	0.00737588	0.05668	0.253297	0.310017	0.307227	0.0602791
0.00637517	0.0552333	0.25017	0.310428	0.310822	0.061886	2048	CSED	Normal	0.00631228	0.055136	0.249822	0.310058	0.311531	0.0620541	0.00702141	0.0559455	0.252136	0.311369	0.30784	0.060573
0.00657998	0.0548648	0.249206	0.310755	0.311554	0.0619672	2048	CSED	Anormal	0.00647776	0.0548599	0.249261	0.310574	0.311754	0.0619895	0.00700294	0.0546249	0.248618	0.31058	0.312585	0.0615145
0.0064473	0.0549016	0.24893	0.310586	0.311999	0.0620458	2048	CSED	Anormal	0.00638905	0.0548675	0.249014	0.310453	0.312172	0.0620207	0.00715645	0.0548585	0.246849	0.307778	0.316807	0.0614872
0.00640718	0.0549245	0.248965	0.310734	0.311866	0.0620145	2048	CSED	Normal	0.00632114	0.0549385	0.24905	0.310638	0.31193	0.0620308	0.00702153	0.0546807	0.246922	0.308869	0.315995	0.0614553
0.00643957	0.0547757	0.248746	0.310161	0.312472	0.0623147	2048	CSED	Normal	0.00642783	0.0547856	0.248609	0.309963	0.312742	0.0623834	0.00717396	0.0545916	0.246107	0.305835	0.317623	0.0636071
0.00642303	0.0548045	0.248569	0.310218	0.312536	0.06237	2048	CSED	Normal	0.00637206	0.0547551	0.248553	0.309982	0.312831	0.0624266	0.00694676	0.0543485	0.244861	0.305422	0.319356	0.0640306
0.00641401	0.0549307	0.249145	0.310654	0.311721	0.0620411	2048	CSED	Normal	0.00634692	0.0549001	0.249148	0.310523	0.311953	0.0620384	0.00717534	0.0551586	0.247428	0.30978	0.314057	0.0613292
0.00645004	0.0547053	0.248503	0.309947	0.312894	0.062414	2048	CSED	Normal	0.00637344	0.0547001	0.248337	0.309779	0.313233	0.0625031	0.00724387	0.053975	0.24255	0.302679	0.32372	0.0648147
0.0063881	0.0547529	0.248513	0.310312	0.312558	0.0623999	2048	CSED	Normal	0.00637219	0.0547294	0.248492	0.310075	0.312804	0.0624512	0.00675635	0.0533493	0.241416	0.30293	0.325414	0.0651463
0.00642711	0.0547425	0.248371	0.310105	0.312863	0.0624142	2048	CSED	Normal	0.00634799	0.0547272	0.248412	0.309871	0.313111	0.0624667	0.00691449	0.0539362	0.243915	0.304799	0.321264	0.064157
0.00655235	0.0554289	0.248483	0.311093	0.311443	0.061851	2048	CSED	Normal	0.00804534	0.0558434	0.247161	0.316844	0.30653	0.0603751	0.00651922	0.0554887	0.248388	0.310909	0.31165	0.0618954
0.00639699	0.0551082	0.248598	0.311139	0.311798	0.0618358	2048	CSED	Normal	0.00688563	0.0555181	0.247964	0.318469	0.305913	0.0601969	0.00639863	0.0551252	0.248401	0.310992	0.312096	0.0618623
0.00643474	0.0549293	0.248856	0.310663	0.312138	0.0618952	2048	CSEI	Anormal	0.00635299	0.0549719	0.248876	0.31079	0.312049	0.0618746	0.00688476	0.055001	0.247256	0.312018	0.312681	0.061107
0.00636731	0.0550332	0.249042	0.310551	0.312044	0.061869	2048	CSEI	Normal	0.00636801	0.0550877	0.249127	0.310515	0.311939	0.0618648	0.00663796	0.0548621	0.248362	0.312296	0.311419	0.0613545
0.00589916	0.0503644	0.227914	0.314217	0.338388	0.0585202	2048	CSEI	Anormal	0.00585451	0.0506683	0.229336	0.313489	0.337276	0.058653	0.0057358	0.0421753	0.190899	0.339997	0.360301	0.0566811
0.00637668	0.0544404	0.246547	0.31349	0.312422	0.0616675	2048	CSEI	Anormal	0.00634395	0.0545451	0.246765	0.313283	0.31236	0.0616497	0.00664448	0.052144	0.233958	0.325898	0.31602	0.0604789
0.00639498	0.0545719	0.247012	0.313378	0.311919	0.0616853	2048	CSEI	Normal	0.00628338	0.054587	0.247308	0.313162	0.31189	0.0617305	0.00672221	0.0523343	0.236172	0.327242	0.312112	0.0605201
0.00638053	0.0549565	0.249103	0.310594	0.311911	0.0619614	2048	CSEI	Normal	0.00635992	0.0549392	0.249156	0.310619	0.311853	0.0619781	0.00674307	0.0549897	0.24836	0.310768	0.312966	0.0611107
0.00635024	0.0549834	0.249098	0.310493	0.312133	0.0618576	2048	CSEI	Normal	0.00634744	0.0549968	0.249086	0.310493	0.312071	0.0619218	0.00680091	0.0550253	0.247733	0.310337	0.313955	0.0610852
0.00637613	0.0549414	0.24895	0.310762	0.311968	0.0619178	2048	CSEI	Normal	0.00636432	0.0550017	0.249223	0.310576	0.311817	0.0619293	0.00663592	0.0554451	0.254448	0.312163	0.306438	0.0598185
0.00637441	0.0549422	0.249202	0.3104	0.312096	0.0619008	2048	CSEI	Normal	0.00637477	0.0549745	0.249204	0.310372	0.312068	0.0619215	0.00715729	0.0556362	0.246899	0.309688	0.314534	0.0610067
0.00640705	0.0547855	0.24875	0.310406	0.312344	0.0622349	2048	CSEI	Normal	0.00649296	0.0548074	0.248834	0.310343	0.31221	0.0622304	0.00727398	0.0544024	0.245666	0.30592	0.318347	0.06337
0.00637857	0.054918	0.249159	0.310911	0.311528	0.0620182	2048	CSEI	Normal	0.00634104	0.0549475	0.249195	0.310817	0.311558	0.0620542	0.0069729	0.0554482	0.25013	0.311492	0.309669	0.0611934
0.00651551	0.054927	0.249052	0.310898	0.311484	0.0620351	2048	CSEI	Normal	0.00634084	0.0549233	0.249201	0.310771	0.311624	0.0620475	0.00759342	0.0552791	0.249103	0.310913	0.310948	0.0610734
0.00635945	0.0549477	0.249019	0.310845	0.311702	0.0620476	2048	CSEI	Anormal	0.00634963	0.0549013	0.249125	0.310721	0.311783	0.0620387	0.00728286	0.0558963	0.249212	0.310903	0.310658	0.0609543
0.00641049	0.0548727	0.248952	0.310897	0.311672	0.0621013	2048	CSEI	Normal	0.00632391	0.0548978	0.248917	0.310756	0.311858	0.0621619	0.00718367	0.0568498	0.25463	0.310645	0.305501	0.060055
0.00659715	0.0559366	0.252629	0.310147	0.308297	0.0612871	2048	CSEI	Normal	0.00632604	0.0555173	0.251245	0.309855	0.310219	0.061747	0.00687149	0.0552524	0.250741	0.312248	0.30875	0.061049
0.00644609	0.0549027	0.249152	0.310854	0.311518	0.0620395	2048	CSEI	Anormal	0.00640851	0.0549236	0.249206	0.310662	0.311633	0.0620755	0.00686728	0.0546179	0.248877	0.311036	0.311921	0.0616029
0.00655639	0.0548614	0.248871	0.310537	0.31204	0.0620519	2048	CSEI	Anormal	0.00642244	0.0548498	0.24899	0.310412	0.312201	0.062041	0.00729844	0.054376	0.246022	0.307159	0.318777	0.0613169
0.00638446	0.0548499	0.248899	0.310708	0.312055	0.0620098	2048	CSEI	Normal	0.00636963	0.0549262	0.249074	0.310604	0.31192	0.0620094	0.00705872	0.0543879	0.245091	0.307766	0.319173	0.0614823
0.00645633	0.0547899	0.248655	0.310273	0.312378	0.0623662	2048	CSEI	Normal	0.0064601	0.0547811	0.248696	0.310094	0.312518	0.0623697	0.00702832	0.0541405	0.245335	0.305911	0.318529	0.0640219
0.00647514	0.0547816	0.248563	0.31018	0.31253	0.062386	2048	CSEI	Normal	0.00635133	0.0547773	0.248606	0.309946	0.312762	0.0624764	0.00720709	0.0538801	0.243979	0.30441	0.32079	0.0647182
0.00636817	0.0549088	0.249109	0.31085	0.311659	0.0620157	2048	CSEI	Normal	0.00634589	0.0549293	0.249211	0.310645	0.311745	0.0620353	0.00700088	0.0551478	0.248347	0.310905	0.312184	0.0613346
0.00646364	0.0546617	0.248275	0.309858	0.313158	0.062508	2048	CSEI	Normal	0.00637909	0.0546518	0.248153	0.309686	0.313449	0.0626028	0.00755614	0.0530982	0.239948	0.302086	0.327163	0.0651801
0.00652946	0.0547863	0.248577	0.310326	0.312364	0.062337	2048	CSEI	Normal	0.00645047	0.0547845	0.248657	0.310149	0.31255	0.0623313	0.00703885	0.0541472	0.245561	0.30676	0.317934	0.0635354
0.00634628	0.0547947	0.248486	0.310197	0.312733	0.0623538	2048	CSEI	Normal	0.00631292	0.0547607	0.248466	0.309981	0.31297	0.0624329	0.00682176	0.0538634	0.244466	0.306103	0.320004	0.063733
0.00644387	0.0554294	0.248491	0.311195	0.311434	0.0618792	2048	CSEI	Normal	0.00707355	0.0555821	0.247825	0.315359	0.308206	0.0608544	0.00648136	0.0555618	0.248344	0.310867	0.311703	0.0619085
0.00642474	0.0550908	0.248454	0.311193	0.311914	0.0618077	2048	CSEI	Normal	0.00715345	0.0554413	0.247488	0.318354	0.306251	0.0602375	0.00636656	0.0551092	0.248272	0.311014	0.312284	0.0618407
0.00640312	0.0549464	0.248704	0.31069	0.312219	0.0619495	2048	CSID	Anormal	0.00633443	0.0550246	0.248935	0.310618	0.312087	0.0619123	0.00676073	0.0550273	0.246417	0.311599	0.313985	0.0611605
0.00646005	0.0549189	0.248711	0.310388	0.312459	0.0619742	2048	CSID	Normal	0.0063965	0.0549697	0.248871	0.310342	0.312355	0.0619712	0.00696574	0.0547638	0.245643	0.308948	0.317071	0.0615634
0.00590328	0.0501281	0.226851	0.317829	0.336278	0.0583372	2048	CSID	Anormal	0.0058418	0.0504214	0.228401	0.316981	0.335116	0.0585415	0.00581957	0.0427501	0.192319	0.345377	0.353848	0.0556749
0.00635487	0.0544531	0.246716	0.313321	0.312456	0.0616468	2048	CSID	Anormal	0.006259	0.054538	0.246953	0.313101	0.312382	0.06171	0.00675131	0.0523181	0.234041	0.326466	0.315389	0.0601631
0.00630902	0.0546103	0.247422	0.313222	0.311644	0.0617245	2048	CSID	Normal	0.00633332	0.0546363	0.247533	0.313073	0.311633	0.0617299	0.00671479	0.0523538	0.235316	0.330109	0.310861	0.0597675
0.00637624	0.0549593	0.249115	0.310611	0.311956	0.0618996	2048	CSID	Normal	0.0064088	0.055016	0.249122	0.310586	0.31187	0.0619109	0.00678536	0.0551277	0.248584	0.310389	0.312996	0.0610501
0.00640999	0.0550158	0.249068	0.310328	0.312194	0.0619033	2048	CSID	Normal	0.0063531	0.0550202	0.249143	0.31037	0.312099	0.0619292	0.00695714	0.0549512	0.245432	0.309352	0.317641	0.060626
0.00640957	0.0550063	0.249029	0.310674	0.311873	0.0619216	2048	CSID	Normal	0.00632603	0.0549826	0.249106	0.310566	0.311912	0.0620143	0.00697516	0.0552148	0.246603	0.309976	0.315372	0.0607993
0.0063688	0.0549611	0.249071	0.310321	0.312316	0.0618705	2048	CSID	Normal	0.00640524	0.0549896	0.249116	0.310274	0.312211	0.0619138	0.00714472	0.0552635	0.246866	0.309405	0.31538	0.0608853
0.0063819	0.0549019	0.249172	0.310886	0.311498	0.0620721	2048	CSID	Normal	0.00635564	0.0549323	0.249276	0.31076	0.311504	0.0620875	0.00694203	0.0551096	0.249216	0.310847	0.311395	0.0614082
0.00640787	0.0549191	0.249116	0.310919	0.311498	0.0620485	2048	CSID	Normal	0.00634728	0.0549554	0.249217	0.310881	0.311493	0.062024	0.00695372	0.0554612	0.250279	0.311279	0.309802	0.0611254
0.00653344	0.0549275	0.249045	0.310821	0.311551	0.0620319	2048	CSID	Normal	0.00649911	0.0549347	0.249141	0.310703	0.311609	0.06203	0.00744543	0.0553338	0.24878	0.310909	0.311294	0.0611399
0.00637506	0.0549429	0.249123	0.310775	0.311661	0.06204	2048	CSID	Anormal	0.00633559	0.0549094	0.249117	0.31064	0.311867	0.0620459	0.00736958	0.0561166	0.247854	0.310786	0.312014	0.060778
0.00639637	0.0548889	0.249062	0.3109	0.311584	0.0620756	2048	CSID	Normal	0.00637773	0.0549092	0.249007	0.310743	0.31177	0.0621076	0.00826106	0.0576764	0.255757	0.310227	0.303594	0.0593259
0.00650198	0.055235	0.250164	0.310451	0.310691	0.0618659	2048	CSID	Normal	0.00638974	0.0551241	0.249797	0.310139	0.311424	0.0620358	0.00760879	0.0561986	0.252277	0.31162	0.307056	0.0601198
0.00657802	0.054828	0.249203	0.310833	0.311489	0.061998	2048	CSID	Anormal	0.00650135	0.0548571	0.249183	0.310687	0.311657	0.0620303	0.00731366	0.0549329	0.248965	0.310695	0.311488	0.0614899
0.00647882	0.0548724	0.248964	0.310574	0.311994	0.0620246	2048	CSID	Anormal	0.00634907	0.0549033	0.248939	0.310485	0.312253	0.0619932	0.00728727	0.0547883	0.246238	0.307021	0.318057	0.0615493
0.00642532	0.0548774	0.248945	0.310669	0.312012	0.061989	2048	CSID	Normal	0.0063137	0.0549165	0.24917	0.31063	0.311854	0.062021	0.00716083	0.0545442	0.246473	0.308439	0.31687	0.0614539
0.00646071	0.0547851	0.248614	0.31016	0.312529	0.0623689	2048	CSID	Normal	0.00635333	0.0547638	0.248556	0.309871	0.312893	0.0624759	0.00703344	0.054025	0.244574	0.304397	0.320569	0.0643736
0.0065486	0.0548144	0.24862	0.310175	0.312414	0.062342	2048	CSID	Normal	0.00647101	0.0548019	0.248524	0.309928	0.312783	0.0624143	0.0072063	0.0542503	0.244735	0.305357	0.3194	0.0640025
0.00636833	0.0548937	0.249093	0.310767	0.311711	0.0620753	2048	CSID	Normal	0.00635153	0.0549043	0.249222	0.31058	0.311832	0.0620129	0.00689426	0.0548756	0.248029	0.310331	0.313378	0.0614284
0.00639856	0.054787	0.248565	0.310169	0.31261	0.0623932	2048	CSID	Normal	0.00639766	0.0547477	0.248503	0.30999	0.31285	0.0624305	0.00719086	0.0540188	0.243973	0.30559	0.320204	0.0640016
0.0063551	0.0547639	0.248516	0.310307	0.312609	0.062373	2048	CSID	Normal	0.00631026	0.0547796	0.248573	0.310106	0.312748	0.0624092	0.00678048	0.0540452	0.244908	0.306217	0.319269	0.063755
0.00637116	0.0547839	0.248477	0.310079	0.312836	0.0623723	2048	CSID	Normal	0.00631812	0.0547273	0.24847	0.309868	0.313034	0.0625046	0.00688283	0.0537598	0.244011	0.305394	0.320832	0.0641198
0.00640074	0.0554158	0.248497	0.311151	0.311475	0.0619228	2048	CSID	Normal	0.00708595	0.0553722	0.247317	0.31627	0.308033	0.0608054	0.00645162	0.0555405	0.248229	0.31093	0.311791	0.0619093
0.00638568	0.0550594	0.248628	0.311018	0.311973	0.06182	2048	CSID	Normal	0.00678781	0.0555118	0.248087	0.31801	0.306286	0.0602536	0.00637656	0.055107	0.24841	0.310881	0.312254	0.0618462
0.00637266	0.0551179	0.248715	0.310851	0.311957	0.0618559	2048	CSIE	Normal	0.00681302	0.0555068	0.247499	0.318534	0.306328	0.0602501	0.00635104	0.0549373	0.248163	0.31091	0.312628	0.0619144
0.00644096	0.0549509	0.248761	0.310696	0.312177	0.0618976	2048	CSII	Anormal	0.00638955	0.0549769	0.248901	0.310586	0.312137	0.0619218	0.00708428	0.0546985	0.244749	0.31205	0.315413	0.0609885
0.00635827	0.0549431	0.248821	0.310326	0.312537	0.0619249	2048	CSII	Normal	0.0063361	0.0549862	0.248916	0.310313	0.312442	0.0619255	0.00714822	0.0546401	0.244991	0.309378	0.317516	0.0612751
0.00589677	0.0505649	0.229202	0.31355	0.337354	0.0587203	2048	CSII	Anormal	0.00589604	0.0508623	0.230457	0.312861	0.336371	0.0588119	0.00563794	0.0433177	0.19615	0.338225	0.355924	0.0564961
0.00634937	0.0544773	0.246761	0.313342	0.312326	0.0616949	2048	CSII	Anormal	0.00630925	0.0545608	0.247116	0.313046	0.312195	0.0617176	0.00665098	0.0521521	0.234056	0.326631	0.315332	0.0602989
0.00634051	0.0545603	0.247056	0.313342	0.311934	0.0617095	2048	CSII	Normal	0.00630808	0.0545578	0.247211	0.313159	0.311997	0.0616993	0.00664886	0.0519281	0.234548	0.328328	0.313138	0.0604917
0.00638905	0.0549949	0.249064	0.310588	0.311919	0.0619578	2048	CSII	Normal	0.00634901	0.0549922	0.249152	0.310625	0.311834	0.0619607	0.00671802	0.0549998	0.24834	0.310706	0.313064	0.061111
0.00635456	0.0549999	0.249097	0.31039	0.312202	0.061875	2048	CSII	Normal	0.00633072	0.0550215	0.249109	0.310376	0.312183	0.0618918	0.00688681	0.0551006	0.247677	0.310302	0.314024	0.0609476
0.00629831	0.054929	0.249074	0.310779	0.31185	0.0619841	2048	CSII	Normal	0.00633414	0.0549746	0.249209	0.310653	0.311777	0.0619611	0.00660805	0.0536438	0.246821	0.312999	0.313295	0.0615957
0.00640138	0.0549833	0.24911	0.310395	0.312145	0.0618741	2048	CSII	Normal	0.0063981	0.0549993	0.249163	0.310304	0.312113	0.0619298	0.00719526	0.0551617	0.247779	0.309924	0.313872	0.0610045
0.00634964	0.0547836	0.24882	0.310405	0.312285	0.0622784	2048	CSII	Normal	0.00635118	0.0548298	0.248926	0.31031	0.312242	0.0622564	0.00695308	0.0544794	0.246453	0.307192	0.316935	0.0629481
0.00637672	0.0549449	0.249076	0.310912	0.311566	0.0620422	2048	CSII	Normal	0.00633425	0.0549247	0.249228	0.310878	0.311502	0.0620431	0.00697852	0.0553434	0.249693	0.311079	0.310489	0.0613278
0.0063526	0.0548996	0.24908	0.310946	0.311578	0.0620497	2048	CSII	Normal	0.00631836	0.0549293	0.249162	0.310832	0.31159	0.0620783	0.00708983	0.0552174	0.249504	0.311274	0.310551	0.0612693
0.00635867	0.054923	0.249134	0.310822	0.311637	0.0620361	2048	CSII	Anormal	0.00637053	0.0549022	0.249198	0.310608	0.311782	0.0620535	0.00737178	0.0560286	0.249143	0.310853	0.31053	0.0609701
0.0064196	0.0549415	0.24906	0.310648	0.311726	0.0621277	2048	CSII	Normal	0.00634659	0.0548738	0.248874	0.310412	0.312162	0.0622475	0.00721222	0.0564269	0.253747	0.311099	0.306075	0.060316
0.00639031	0.0558673	0.252425	0.30987	0.30896	0.0613843	2048	CSII	Normal	0.00632214	0.0557818	0.251953	0.309421	0.309764	0.0616547	0.00722545	0.0519136	0.23507	0.292194	0.340012	0.0686197
0.00643171	0.0548858	0.249144	0.310889	0.311523	0.0620406	2048	CSII	Anormal	0.00640709	0.0549251	0.249288	0.310713	0.31152	0.0620538	0.006889	0.0546037	0.248869	0.311081	0.311926	0.0615582
0.00637779	0.054858	0.248964	0.310607	0.312082	0.0620188	2048	CSII	Anormal	0.00633812	0.0548798	0.248881	0.310414	0.312365	0.0620374	0.00703137	0.0541155	0.245068	0.307019	0.320201	0.0615263
0.00636167	0.0548773	0.249	0.310765	0.311891	0.0620098	2048	CSII	Normal	0.00632485	0.0549175	0.249209	0.310751	0.311713	0.0619958	0.00699094	0.0548247	0.247671	0.310115	0.314118	0.0612184
0.00635952	0.0548261	0.24874	0.310321	0.312338	0.0623289	2048	CSII	Normal	0.00635088	0.054799	0.248725	0.310127	0.312533	0.0623915	0.00694812	0.0543286	0.245855	0.307244	0.317092	0.0634942
0.00644056	0.0548136	0.248575	0.310183	0.312553	0.0623506	2048	CSII	Normal	0.00635	0.0547537	0.248569	0.310003	0.312789	0.0624509	0.00696348	0.0542498	0.245619	0.306528	0.317925	0.0636834
0.00638627	0.054901	0.249125	0.310781	0.311688	0.0620246	2048	CSII	Normal	0.00633573	0.0549251	0.249202	0.310721	0.311726	0.0620049	0.00693174	0.0549711	0.248241	0.310636	0.312757	0.0613874
0.00636868	0.054731	0.248391	0.310116	0.312864	0.0624482	2048	CSII	Normal	0.00632303	0.0547252	0.248318	0.309888	0.313132	0.0625373	0.00693313	0.0534357	0.242369	0.304414	0.323101	0.0647573
0.00643168	0.0547755	0.248549	0.310306	0.3125	0.062361	2048	CSII	Normal	0.00637975	0.0547771	0.248545	0.31013	0.312721	0.0623661	0.00690131	0.0540202	0.245044	0.306412	0.318939	0.0636697
0.00639333	0.0547347	0.248583	0.310191	0.312704	0.0623166	2048	CSII	Normal	0.00631218	0.0547613	0.24852	0.310082	0.312863	0.0623811	0.00687	0.0538551	0.244643	0.306267	0.319827	0.063524
0.0064292	0.0554178	0.248572	0.311093	0.311489	0.0618733	2048	CSII	Normal	0.00714131	0.0554982	0.247702	0.315292	0.308355	0.0609194	0.00649401	0.0554795	0.248353	0.31091	0.311714	0.0619235
0.00647829	0.0550912	0.248354	0.311192	0.31196	0.0618144	2048	CSII	Normal	0.006961	0.0551336	0.246801	0.319173	0.306619	0.0602706	0.00636119	0.0551581	0.248141	0.311092	0.3123	0.0618373
0.00642394	0.0550702	0.248488	0.311233	0.311856	0.0618061	2048	CSII	Normal	0.00706235	0.0551365	0.246458	0.320651	0.305602	0.0600394	0.00639121	0.0551142	0.248269	0.311055	0.312244	0.0617999
ch2: 0-1kHz	ch2: 1-10kHz	ch2: 10-50kHz	ch2: 50-100kHz	ch2: 100-150kHz	ch2: 150-160kHz	exp	quadrant	class	ch0: 0-1kHz	ch0: 1-10kHz	ch0: 10-50kHz	ch0: 50-100kHz	ch0: 100-150kHz	ch0: 150-160kHz	ch1: 0-1kHz	ch1: 1-10kHz	ch1: 10-50kHz	ch1: 50-100kHz	ch1: 100-150kHz	ch1: 150-160kHz

## Sheet: 4096
0.00636051	0.0554551	0.249399	0.311146	0.313146	0.0619455		CIED	Anormal	0.00632757	0.0554537	0.249532	0.311167	0.313034	0.0619385	0.00681286	0.0555931	0.247683	0.312542	0.313756	0.0610825
0.00634994	0.0554835	0.249706	0.311087	0.312885	0.0619342	4096	CIED	Normal	0.00630238	0.0555113	0.24979	0.311153	0.312793	0.0618909	0.00653882	0.0551775	0.248814	0.312984	0.312601	0.0613462
0.00591485	0.0510563	0.229856	0.317096	0.3351	0.0586175	4096	CIED	Anormal	0.0058338	0.0510075	0.229493	0.317185	0.335595	0.0585231	0.00560959	0.0433525	0.194879	0.345082	0.353331	0.055656
0.00630063	0.0549233	0.247169	0.313885	0.313531	0.0616563	4096	CIED	Anormal	0.00628363	0.0550045	0.247505	0.313485	0.313474	0.0617119	0.00647367	0.0528549	0.236102	0.324631	0.316967	0.060527
0.00629261	0.0550097	0.247719	0.314095	0.312681	0.0616669	4096	CIED	Normal	0.00628813	0.0550178	0.247918	0.313931	0.312623	0.0616852	0.00646688	0.0525981	0.236686	0.329621	0.312051	0.0601253
0.00634393	0.0554612	0.249582	0.311128	0.312999	0.0619376	4096	CIED	Normal	0.00631145	0.0554576	0.249707	0.311056	0.312978	0.0619395	0.00669103	0.0554773	0.248168	0.310614	0.31552	0.0610053
0.00631802	0.0554183	0.249747	0.310838	0.31324	0.0618893	4096	CIED	Normal	0.00628609	0.0554661	0.249729	0.310886	0.313158	0.061924	0.00658573	0.055393	0.248031	0.310554	0.315892	0.061018
0.006357	0.0554748	0.249678	0.311173	0.312851	0.0619124	4096	CIED	Normal	0.00629393	0.055487	0.249713	0.311074	0.312893	0.0619883	0.00678643	0.0554894	0.247715	0.311034	0.315567	0.0608804
0.00638414	0.0554222	0.249597	0.310883	0.313283	0.0618763	4096	CIED	Normal	0.00631241	0.055431	0.249739	0.310839	0.313202	0.0619185	0.0068553	0.0556656	0.248083	0.310165	0.315581	0.0611138
0.00636826	0.0553932	0.249616	0.311386	0.312598	0.062098	4096	CIED	Normal	0.00635701	0.0554402	0.249805	0.3112	0.312547	0.062109	0.00694475	0.0556237	0.250239	0.311165	0.312171	0.0613169
0.00635027	0.0554423	0.249591	0.311456	0.31253	0.0620862	4096	CIED	Normal	0.00631887	0.0554787	0.249653	0.311365	0.312593	0.0620523	0.00689764	0.0559263	0.250528	0.311892	0.31108	0.061136
0.00637357	0.0554159	0.249636	0.311395	0.312595	0.0620402	4096	CIED	Normal	0.00629705	0.0554486	0.249733	0.311309	0.312617	0.0620549	0.00687771	0.055687	0.250062	0.311682	0.311857	0.0612905
0.00635892	0.0554009	0.249612	0.311284	0.312745	0.0620572	4096	CIED	Anormal	0.00631193	0.0554491	0.249646	0.311238	0.312771	0.0620415	0.00700223	0.0563324	0.249082	0.311484	0.31262	0.0609476
0.00637504	0.0554211	0.249475	0.311267	0.312785	0.0621303	4096	CIED	Normal	0.00632787	0.0553757	0.249446	0.311204	0.312947	0.0621573	0.00717465	0.0571681	0.253467	0.310886	0.308619	0.0601271
0.00634457	0.0557849	0.250929	0.311038	0.311558	0.0618003	4096	CIED	Normal	0.00630525	0.0556411	0.250369	0.310627	0.312435	0.0620758	0.00683188	0.0561422	0.25231	0.312237	0.309201	0.0607302
0.00647208	0.0553534	0.249668	0.311284	0.31265	0.0620298	4096	CIED	Anormal	0.0063748	0.0554159	0.249689	0.311113	0.312782	0.0620834	0.00690021	0.0552094	0.249309	0.311209	0.313132	0.0616951
0.00640509	0.0553958	0.249386	0.311237	0.313002	0.0620334	4096	CIED	Anormal	0.0063525	0.0554254	0.24944	0.310954	0.313255	0.0620239	0.00724424	0.055033	0.246652	0.307877	0.319148	0.0615143
0.00635128	0.0554072	0.249514	0.311232	0.312941	0.0620053	4096	CIED	Normal	0.00632154	0.0554178	0.249656	0.311213	0.312847	0.0619962	0.00678815	0.0547243	0.245096	0.307956	0.321439	0.0614904
0.00637846	0.0553285	0.249135	0.310757	0.3135	0.0623562	4096	CIED	Normal	0.00635999	0.0552781	0.249118	0.310495	0.313768	0.0624395	0.00689902	0.0545461	0.244652	0.305386	0.321746	0.064253
0.00635832	0.0553329	0.24926	0.310803	0.3134	0.0623003	4096	CIED	Normal	0.00630953	0.055269	0.249174	0.310604	0.313728	0.0623713	0.00684419	0.0546986	0.245448	0.306291	0.320307	0.0638954
0.00635463	0.0553898	0.249576	0.311349	0.312738	0.0620366	4096	CIED	Normal	0.00632049	0.0554116	0.24968	0.311163	0.312841	0.0620336	0.00692723	0.0554757	0.248061	0.310886	0.314754	0.0613648
0.00637736	0.055291	0.249093	0.310679	0.313643	0.062379	4096	CIED	Normal	0.00631712	0.055269	0.248978	0.310483	0.313981	0.0624375	0.0069082	0.0546364	0.244819	0.306334	0.320891	0.0638953
0.00636074	0.0552318	0.249021	0.310665	0.313808	0.0623758	4096	CIED	Normal	0.00632236	0.0552707	0.248987	0.310425	0.313999	0.0624512	0.0067636	0.0542291	0.243865	0.305552	0.322896	0.0641878
0.00637934	0.0552293	0.248941	0.310735	0.313808	0.0623684	4096	CIED	Normal	0.00633317	0.0552595	0.249029	0.310549	0.313861	0.0624282	0.0068448	0.0539821	0.24292	0.304865	0.324792	0.06411
0.0063881	0.0557265	0.249091	0.311808	0.312514	0.0618994	4096	CIED	Normal	0.00678368	0.0556072	0.248243	0.316499	0.309386	0.0609317	0.00636685	0.055778	0.248924	0.311584	0.312803	0.0619605
0.00636636	0.055408	0.249407	0.311129	0.313172	0.0619711	4096	CIEI	Anormal	0.00630565	0.0554433	0.249529	0.311153	0.313067	0.0619604	0.00665025	0.0553246	0.247178	0.312503	0.314681	0.0611417
0.00635723	0.0553592	0.249327	0.310674	0.313745	0.0619886	4096	CIEI	Normal	0.00633674	0.0554346	0.24948	0.310932	0.313335	0.0619324	0.00687661	0.0548293	0.245435	0.309992	0.319097	0.0612518
0.00590574	0.0511816	0.230518	0.313765	0.337487	0.0587727	4096	CIEI	Anormal	0.00588535	0.0515521	0.232076	0.313092	0.336085	0.0589276	0.00556344	0.0433256	0.194264	0.344605	0.354682	0.0554464
0.00629219	0.0549204	0.247183	0.314022	0.313376	0.0616748	4096	CIEI	Anormal	0.00625435	0.0550052	0.247571	0.313714	0.313251	0.0616745	0.00636364	0.0519526	0.232376	0.327919	0.318481	0.0604892
0.00628325	0.054981	0.247429	0.314034	0.313048	0.061682	4096	CIEI	Normal	0.00626476	0.0550113	0.24771	0.313814	0.31295	0.0617133	0.00648056	0.052139	0.232268	0.332935	0.313702	0.0600357
0.00634335	0.0554179	0.249777	0.311186	0.312772	0.0619537	4096	CIEI	Normal	0.00631441	0.0554497	0.249827	0.311178	0.312707	0.0619722	0.00666675	0.0554336	0.248151	0.311086	0.31522	0.0609208
0.00636154	0.0554249	0.249618	0.310946	0.313209	0.0618862	4096	CIEI	Normal	0.00633824	0.0554736	0.249691	0.310892	0.313135	0.0619184	0.00681039	0.0555581	0.247451	0.310633	0.316073	0.0609456
0.00632627	0.055385	0.24957	0.311289	0.312841	0.0620423	4096	CIEI	Normal	0.00632319	0.0554834	0.249757	0.311104	0.312826	0.0619587	0.00659079	0.0543746	0.247085	0.31315	0.314809	0.0614698
0.00633233	0.0554057	0.249697	0.310956	0.313095	0.0619608	4096	CIEI	Normal	0.00631783	0.0554381	0.249721	0.310929	0.313081	0.0619616	0.00668186	0.05544	0.248738	0.311029	0.314438	0.0611483
0.0063646	0.0552857	0.249284	0.310736	0.313493	0.0623008	4096	CIEI	Normal	0.00632147	0.05533	0.249375	0.310781	0.313354	0.0622997	0.00675046	0.0545322	0.243921	0.304716	0.323625	0.0639669
0.00635631	0.0554435	0.249561	0.311501	0.312541	0.0620548	4096	CIEI	Normal	0.00631612	0.0554814	0.249647	0.311445	0.312524	0.0620439	0.00682066	0.0557831	0.250635	0.311959	0.310986	0.0612746
0.00636698	0.055458	0.249611	0.311411	0.312569	0.0620419	4096	CIEI	Normal	0.00634508	0.0554611	0.249736	0.311347	0.312508	0.0620559	0.00686692	0.0556942	0.25072	0.312102	0.310906	0.06117
0.00635459	0.0553958	0.249584	0.311424	0.312657	0.0620431	4096	CIEI	Anormal	0.00630254	0.0554207	0.249635	0.311311	0.312743	0.0620471	0.00686323	0.0561787	0.250568	0.311805	0.311054	0.0609885
0.00640341	0.055444	0.249632	0.311182	0.312686	0.0621096	4096	CIEI	Normal	0.00637211	0.0554265	0.249351	0.311033	0.313017	0.062253	0.00710889	0.0569816	0.254531	0.311788	0.306738	0.0602921
0.00639244	0.056505	0.253304	0.310711	0.309287	0.0612475	4096	CIEI	Normal	0.00633704	0.056353	0.252775	0.310165	0.310374	0.0614463	0.0088055	0.0662027	0.246572	0.280325	0.329059	0.0663561
0.00641595	0.0553904	0.249488	0.311191	0.312945	0.0620262	4096	CIEI	Anormal	0.00632198	0.0553948	0.249562	0.311142	0.312992	0.0620457	0.00713245	0.0546554	0.246077	0.309076	0.319274	0.0612646
0.00641471	0.0553786	0.249366	0.311142	0.313126	0.0620269	4096	CIEI	Anormal	0.006335	0.0554039	0.249358	0.310947	0.313348	0.0620615	0.00711064	0.0544776	0.243909	0.306372	0.324456	0.0611649
0.00638618	0.055371	0.249532	0.311174	0.312962	0.062027	4096	CIEI	Normal	0.00634769	0.0553967	0.249602	0.311215	0.312866	0.0620203	0.00695006	0.0552056	0.24786	0.31007	0.316058	0.0613253
0.00643424	0.0553125	0.24922	0.310787	0.313362	0.0623396	4096	CIEI	Normal	0.00639027	0.0552767	0.249193	0.310646	0.313572	0.062376	0.00685034	0.0548787	0.246275	0.30764	0.318349	0.0634877
0.00634322	0.0553023	0.249127	0.310772	0.313585	0.0623261	4096	CIEI	Normal	0.00631076	0.0552852	0.249081	0.310448	0.31391	0.0624192	0.00681415	0.0544558	0.244619	0.30586	0.321601	0.064144
0.00635039	0.0553974	0.24964	0.311359	0.312667	0.0620314	4096	CIEI	Normal	0.00633288	0.0554304	0.249738	0.311242	0.31269	0.0620171	0.00680436	0.0552843	0.248997	0.31177	0.313297	0.061311
0.0063405	0.0552514	0.249002	0.310684	0.313737	0.062444	4096	CIEI	Normal	0.00629965	0.0552487	0.249009	0.310574	0.313867	0.0624599	0.00675979	0.0543167	0.244593	0.306759	0.321198	0.0638679
0.00634623	0.0552738	0.249044	0.310741	0.313684	0.0623687	4096	CIEI	Normal	0.00631406	0.0552603	0.249021	0.310662	0.313795	0.0624161	0.00674818	0.0538653	0.241648	0.304067	0.326397	0.0647928
0.00634774	0.0552744	0.249101	0.310838	0.313534	0.062364	4096	CIEI	Normal	0.00629274	0.0552758	0.249104	0.310583	0.313811	0.0623962	0.00678345	0.0540421	0.243474	0.305843	0.323376	0.0639969
0.00638742	0.0557493	0.249042	0.311746	0.312624	0.0618591	4096	CIEI	Normal	0.00679557	0.0556319	0.248778	0.31616	0.309126	0.0609526	0.00638932	0.0558477	0.248946	0.311525	0.312814	0.0618922
0.00637657	0.0554314	0.249069	0.311742	0.312985	0.0618297	4096	CIEI	Normal	0.00665099	0.0555343	0.248285	0.318412	0.308167	0.0604177	0.00638349	0.0554949	0.248785	0.311672	0.313289	0.0618068
0.00636458	0.0554115	0.249319	0.311194	0.31324	0.0619266	4096	CIID	Anormal	0.00630809	0.0554603	0.249496	0.31114	0.313072	0.0619721	0.00675525	0.0554205	0.246991	0.31242	0.314744	0.0611409
0.00637725	0.0555009	0.249588	0.311114	0.31295	0.0619129	4096	CIID	Normal	0.00632538	0.0555249	0.249754	0.31115	0.312772	0.0619164	0.00646011	0.05498	0.247931	0.313423	0.313322	0.0613544
0.00587632	0.0505986	0.227542	0.318761	0.336712	0.0581693	4096	CIID	Anormal	0.00594373	0.0511571	0.230331	0.316952	0.334803	0.0584498	0.00563068	0.0415241	0.186044	0.353105	0.357083	0.0545664
0.00632558	0.0548997	0.247179	0.314004	0.313409	0.0616519	4096	CIID	Anormal	0.00626938	0.055012	0.24744	0.313662	0.313427	0.061661	0.00651987	0.0518614	0.230237	0.328597	0.320005	0.0603662
0.00628562	0.0549422	0.247438	0.314263	0.312813	0.0617213	4096	CIID	Normal	0.00625022	0.0549988	0.247527	0.314307	0.312697	0.0616823	0.00641426	0.0518887	0.233646	0.330756	0.314462	0.0603917
0.00634054	0.0554243	0.249713	0.311149	0.312887	0.0619324	4096	CIID	Normal	0.00630085	0.0555089	0.249772	0.311055	0.312838	0.0619703	0.00673568	0.0555427	0.24756	0.310966	0.315912	0.0607628
0.00634621	0.0554315	0.249644	0.310913	0.313223	0.0618903	4096	CIID	Normal	0.00630871	0.0554774	0.249694	0.310851	0.313184	0.0619294	0.00671558	0.0552501	0.246069	0.310214	0.318725	0.0605087
0.00636516	0.0554428	0.249654	0.311127	0.312903	0.0619578	4096	CIID	Normal	0.00630267	0.0554543	0.249649	0.311177	0.312883	0.0619859	0.0068364	0.0556091	0.248192	0.311024	0.31476	0.0610399
0.00638158	0.0554523	0.249683	0.310757	0.31327	0.0619019	4096	CIID	Normal	0.00635096	0.0554861	0.249754	0.310751	0.313158	0.0619421	0.00688841	0.0556516	0.247718	0.309861	0.316222	0.0611272
0.00640118	0.0554095	0.249656	0.311381	0.31255	0.0620543	4096	CIID	Normal	0.00632974	0.0554193	0.249744	0.311313	0.312585	0.0620682	0.00717153	0.0557127	0.249056	0.311553	0.312898	0.0610765
0.0063601	0.0554423	0.249616	0.311461	0.312521	0.0620527	4096	CIID	Normal	0.00631309	0.0554414	0.249711	0.311412	0.312562	0.0620172	0.00687741	0.055978	0.250311	0.311952	0.311151	0.0611928
0.00637477	0.0554404	0.249615	0.311416	0.312585	0.0620267	4096	CIID	Normal	0.00631278	0.0554603	0.249661	0.311305	0.312702	0.0620177	0.00696152	0.0556631	0.249792	0.3119	0.311995	0.0611438
0.00635718	0.0554364	0.249629	0.31124	0.312755	0.0620427	4096	CIID	Anormal	0.00631495	0.0554309	0.249661	0.311208	0.312813	0.0620307	0.00694203	0.0561163	0.249209	0.311272	0.312862	0.0610699
0.00637875	0.0554041	0.249507	0.311357	0.312731	0.0620759	4096	CIID	Normal	0.00631474	0.0553963	0.249528	0.311178	0.312904	0.0621343	0.00726271	0.0574014	0.253788	0.311332	0.307634	0.0600246
0.00642028	0.0559176	0.25125	0.31107	0.311101	0.0616939	4096	CIID	Normal	0.00631171	0.0556964	0.250634	0.31066	0.312167	0.061987	0.00688671	0.0560651	0.251826	0.312295	0.309586	0.0607998
0.00648901	0.055368	0.249659	0.31138	0.312559	0.0620028	4096	CIID	Anormal	0.00641697	0.0553829	0.24982	0.311103	0.312678	0.0620557	0.007045	0.0552326	0.249498	0.311776	0.312371	0.0615304
0.00639609	0.0554198	0.249383	0.311162	0.313033	0.0620605	4096	CIID	Anormal	0.00637176	0.0554212	0.249362	0.310977	0.313238	0.0620919	0.00712575	0.0546055	0.244352	0.306528	0.323602	0.0612748
0.00636196	0.0553538	0.24953	0.31122	0.31295	0.0620331	4096	CIID	Normal	0.00630424	0.0554409	0.24962	0.311181	0.312874	0.0620284	0.00685491	0.0550433	0.247527	0.309844	0.316805	0.0614003
0.00641942	0.0552795	0.249093	0.310696	0.313538	0.0624294	4096	CIID	Normal	0.00632407	0.0552667	0.249114	0.310418	0.313855	0.0624749	0.00693622	0.0540927	0.242798	0.303375	0.325202	0.0650977
0.00640276	0.0553071	0.24923	0.310806	0.313402	0.0623075	4096	CIID	Normal	0.00633994	0.0552782	0.2492	0.310605	0.313644	0.0623845	0.00688001	0.0542524	0.242988	0.304443	0.324338	0.0645939
0.00637727	0.0554331	0.2496	0.311297	0.312729	0.0620141	4096	CIID	Normal	0.0063097	0.0554196	0.249585	0.311196	0.31288	0.0620601	0.00685327	0.0554517	0.248422	0.311158	0.314204	0.0613751
0.00635427	0.0552942	0.249028	0.310567	0.313769	0.0624367	4096	CIID	Normal	0.00630603	0.0552075	0.248986	0.310408	0.314046	0.0625031	0.00666052	0.0536654	0.241647	0.303788	0.326659	0.0650927
0.00638614	0.0552735	0.248904	0.310567	0.313896	0.0624349	4096	CIID	Normal	0.00633374	0.0553017	0.249122	0.310716	0.313597	0.0623844	0.00720147	0.0534128	0.237973	0.301334	0.332426	0.0651966
0.00635448	0.0552581	0.249028	0.310816	0.313657	0.0623484	4096	CIID	Normal	0.00627831	0.0552719	0.249068	0.310583	0.313874	0.0623885	0.00678868	0.0543554	0.244313	0.306567	0.322048	0.0634287
0.00642555	0.0557825	0.249041	0.311733	0.312554	0.061876	4096	CIID	Normal	0.00684365	0.0557295	0.248742	0.316044	0.309188	0.0608886	0.00643208	0.0558047	0.248855	0.311587	0.312809	0.0619211
0.00633646	0.0553838	0.249402	0.311284	0.313117	0.061932	4096	CIII	Anormal	0.00630305	0.0554372	0.249505	0.311117	0.313128	0.0619641	0.00673422	0.0551338	0.245408	0.31329	0.315947	0.0609782
0.00592973	0.0513938	0.231577	0.31231	0.336435	0.0599647	4096	CIII	Normal	0.00589286	0.0516672	0.232751	0.311833	0.335388	0.060066	0.00573815	0.044036	0.19864	0.336967	0.354801	0.0576514
0.00587628	0.0511655	0.23056	0.314024	0.337367	0.0586369	4096	CIII	Anormal	0.00588475	0.0514852	0.231662	0.313219	0.336694	0.0586738	0.00553679	0.0445783	0.200826	0.33614	0.354419	0.0563499
0.00631307	0.0549579	0.247384	0.313744	0.313373	0.0616964	4096	CIII	Anormal	0.00627392	0.055048	0.247728	0.313369	0.31332	0.061724	0.00644357	0.0529705	0.235741	0.327712	0.314713	0.0599836
0.00626856	0.0550801	0.24802	0.31325	0.313069	0.0617768	4096	CIII	Normal	0.00625917	0.0550755	0.24799	0.313325	0.313062	0.0617463	0.0063835	0.0521482	0.236442	0.328189	0.31389	0.0605065
0.00635259	0.055502	0.249707	0.31115	0.312804	0.0619372	4096	CIII	Normal	0.00631591	0.0555057	0.249745	0.311176	0.312719	0.0619856	0.00665736	0.0555443	0.248568	0.311028	0.314571	0.0611093
0.0063524	0.0554357	0.249717	0.310782	0.313305	0.0618554	4096	CIII	Normal	0.00630066	0.0554604	0.249756	0.310754	0.313236	0.0619371	0.00674325	0.0553795	0.246335	0.310056	0.318228	0.0607362
0.00634149	0.0554452	0.249612	0.311132	0.312942	0.0619811	4096	CIII	Normal	0.00629557	0.0554512	0.24968	0.311132	0.312898	0.0619935	0.00675717	0.0556149	0.24819	0.31158	0.314288	0.0610383
0.00636929	0.0554546	0.249696	0.310928	0.313086	0.0619159	4096	CIII	Normal	0.00634269	0.0554683	0.24969	0.311009	0.312994	0.0619467	0.00690676	0.0555903	0.248163	0.310716	0.315027	0.0610681
0.00635693	0.055322	0.249372	0.310997	0.313251	0.0621612	4096	CIII	Normal	0.00629416	0.0553491	0.249492	0.311066	0.313121	0.0621389	0.00662532	0.0550932	0.247763	0.308571	0.317114	0.0623195
0.0063731	0.0554203	0.249616	0.311415	0.312567	0.0620692	4096	CIII	Normal	0.00634487	0.0554618	0.249625	0.311424	0.31255	0.0620531	0.006827	0.0557974	0.25039	0.311905	0.311159	0.0613832
0.00635177	0.0554266	0.249619	0.311423	0.31257	0.0620644	4096	CIII	Normal	0.00630689	0.055438	0.249739	0.311398	0.312538	0.0620372	0.00672266	0.0555966	0.250696	0.312197	0.310986	0.0612622
0.00636349	0.0554213	0.249581	0.311362	0.312697	0.0620319	4096	CIII	Anormal	0.00634914	0.0554335	0.249594	0.311196	0.312822	0.0620601	0.00696392	0.0560878	0.250215	0.311763	0.311569	0.0608688
0.00639627	0.0555237	0.249753	0.311164	0.312551	0.0620682	4096	CIII	Normal	0.00637437	0.0554882	0.249671	0.310979	0.312807	0.0621328	0.00742615	0.0573884	0.255387	0.312258	0.305009	0.0599587
0.00640778	0.0569275	0.254842	0.310556	0.307821	0.060891	4096	CIII	Normal	0.00629738	0.0562211	0.25259	0.310253	0.310592	0.0614975	0.00675037	0.0551997	0.249905	0.313295	0.310948	0.0613722
0.00636976	0.0553503	0.249524	0.311246	0.31291	0.0620611	4096	CIII	Anormal	0.0063411	0.0554053	0.249561	0.311161	0.312897	0.0620842	0.00708458	0.0550938	0.247578	0.310454	0.315928	0.0613339
0.00640639	0.0553693	0.249431	0.311149	0.313074	0.06202	4096	CIII	Anormal	0.00631976	0.0554069	0.249447	0.310907	0.313316	0.0620627	0.00700177	0.0545351	0.245053	0.307156	0.322317	0.0614237
0.00635	0.0554048	0.249496	0.311324	0.312841	0.0620338	4096	CIII	Normal	0.00632136	0.0554475	0.249694	0.311177	0.312806	0.0620108	0.00694565	0.0553167	0.248204	0.310608	0.315224	0.0611649
0.00637425	0.0553142	0.249324	0.310982	0.313191	0.0622712	4096	CIII	Normal	0.00631162	0.0553295	0.249309	0.310868	0.313314	0.0623189	0.00673205	0.0549507	0.247617	0.309169	0.315947	0.063066
0.00636336	0.0553216	0.249179	0.31088	0.313423	0.0622853	4096	CIII	Normal	0.00635366	0.0553137	0.249138	0.310618	0.313646	0.062387	0.0069101	0.05475	0.24631	0.30747	0.318695	0.0633398
0.0063782	0.0554132	0.249637	0.311348	0.312657	0.0620137	4096	CIII	Normal	0.00634104	0.0554078	0.249761	0.311266	0.312659	0.0620164	0.00686939	0.0554472	0.249339	0.31195	0.312571	0.0612874
0.0063492	0.0552415	0.249076	0.310849	0.313582	0.0623594	4096	CIII	Normal	0.00631642	0.0552593	0.249062	0.310675	0.31372	0.0624286	0.00680337	0.0544719	0.245269	0.307408	0.320072	0.0634674
0.00636197	0.0552794	0.249151	0.310828	0.313492	0.0623415	4096	CIII	Normal	0.00632302	0.0553197	0.249069	0.310663	0.313678	0.062401	0.00687959	0.0545049	0.245384	0.30691	0.320032	0.0637805
0.00637558	0.0553089	0.249088	0.31091	0.313438	0.0623377	4096	CIII	Normal	0.006311	0.0552537	0.2491	0.310741	0.313685	0.0623723	0.00684727	0.0541539	0.243802	0.306277	0.322614	0.0638097
0.00640641	0.0557935	0.249126	0.311682	0.312512	0.0618876	4096	CIII	Normal	0.00686129	0.0557234	0.248371	0.31614	0.309416	0.0609238	0.00643608	0.0558199	0.248835	0.311507	0.312855	0.0619479
0.00633773	0.0554558	0.248981	0.31182	0.313002	0.061838	4096	CIII	Normal	0.00681865	0.0553279	0.247204	0.319677	0.307972	0.0604529	0.00636026	0.0554667	0.248851	0.311644	0.313283	0.0618221
0.00637168	0.0554384	0.249394	0.311143	0.313164	0.0619361	4096	CSED	Anormal	0.00633821	0.0554687	0.249538	0.311178	0.312974	0.0619571	0.00677187	0.0556644	0.247793	0.312399	0.31379	0.0610469
0.00637399	0.0553878	0.249402	0.31094	0.313375	0.0619768	4096	CSED	Normal	0.00629044	0.0553986	0.24958	0.310965	0.313252	0.0619661	0.00692489	0.0552789	0.246373	0.30982	0.317754	0.0613185
0.00592819	0.0507186	0.228365	0.317603	0.33665	0.0583837	4096	CSED	Anormal	0.005872	0.051009	0.229688	0.317002	0.335537	0.0585285	0.00567308	0.0428847	0.191721	0.345806	0.35626	0.0555616
0.00634321	0.0549337	0.247094	0.313969	0.313478	0.0616499	4096	CSED	Anormal	0.00626465	0.0550131	0.247559	0.313641	0.313297	0.0616928	0.00658497	0.052907	0.23517	0.326304	0.31634	0.0602502
0.00630383	0.055087	0.247905	0.31388	0.312592	0.0617007	4096	CSED	Normal	0.00627887	0.0550722	0.248017	0.313777	0.312606	0.0617207	0.00646872	0.0527862	0.236232	0.330499	0.311759	0.0598161
0.00636996	0.0554064	0.24967	0.311097	0.312952	0.0619521	4096	CSED	Normal	0.00630941	0.0554839	0.249739	0.311103	0.312882	0.0619338	0.0067019	0.0555432	0.248738	0.310659	0.314815	0.0610204
0.00635633	0.05543	0.249601	0.310983	0.313143	0.0619356	4096	CSED	Normal	0.00629825	0.0554678	0.249703	0.310864	0.313161	0.0619541	0.0067241	0.055116	0.24845	0.311437	0.314909	0.0608417
0.006362	0.0554804	0.249618	0.311169	0.312894	0.0619265	4096	CSED	Normal	0.00631753	0.0554883	0.24974	0.311112	0.312794	0.0620018	0.00674509	0.0556766	0.248922	0.311232	0.313839	0.0610482
0.00635325	0.0554404	0.249627	0.31086	0.313274	0.0618958	4096	CSED	Normal	0.00631474	0.0554585	0.249743	0.310827	0.313173	0.0619331	0.00675979	0.05573	0.248302	0.310136	0.315483	0.0610596
0.00637133	0.0554111	0.249707	0.311391	0.31252	0.0620547	4096	CSED	Normal	0.00631211	0.0554209	0.249743	0.311391	0.312518	0.0620677	0.00680966	0.0559079	0.250593	0.311211	0.311611	0.0613258
0.00637064	0.0554648	0.249607	0.31144	0.312548	0.0620283	4096	CSED	Normal	0.00632757	0.0554679	0.249654	0.3114	0.312554	0.062052	0.00698314	0.0559771	0.250543	0.311721	0.311097	0.0611306
0.00637699	0.0554606	0.249624	0.311338	0.312647	0.0620097	4096	CSED	Normal	0.00632789	0.0554635	0.249665	0.31129	0.312669	0.0620405	0.00703293	0.0556391	0.249471	0.311584	0.31254	0.0611994
0.00634846	0.0554312	0.249636	0.311339	0.312713	0.0619924	4096	CSED	Anormal	0.0063157	0.0554168	0.24967	0.311226	0.31279	0.0620396	0.0069918	0.0562802	0.250233	0.311513	0.311415	0.0610293
0.00637816	0.0554206	0.249584	0.311312	0.312713	0.0620507	4096	CSED	Normal	0.0063224	0.055426	0.249535	0.31119	0.312878	0.0621032	0.00714999	0.0571234	0.253907	0.310664	0.308295	0.0603023
0.00635658	0.0557454	0.250688	0.310944	0.311835	0.0618882	4096	CSED	Normal	0.00630189	0.0556516	0.250337	0.310572	0.312543	0.0620522	0.00684566	0.0564029	0.252726	0.311986	0.308899	0.0605905
0.00650726	0.055376	0.249744	0.311286	0.31257	0.0619738	4096	CSED	Anormal	0.00641848	0.0553813	0.249794	0.3111	0.312766	0.061994	0.00689901	0.0551253	0.249157	0.311131	0.313625	0.0615221
0.00640296	0.0554156	0.249452	0.311118	0.313017	0.0620466	4096	CSED	Anormal	0.00634206	0.0553811	0.249533	0.310981	0.313188	0.0620258	0.00701457	0.0553268	0.247402	0.308361	0.317866	0.0615009
0.00637767	0.055436	0.249479	0.31126	0.312888	0.0620111	4096	CSED	Normal	0.006299	0.0554545	0.249569	0.311154	0.312941	0.0620294	0.00690538	0.055136	0.247468	0.309439	0.31706	0.0614634
0.00639554	0.0552892	0.249273	0.310686	0.313484	0.0623238	4096	CSED	Normal	0.00635765	0.0552985	0.249151	0.310495	0.313759	0.0623898	0.00703242	0.0550733	0.246656	0.306412	0.318679	0.0636155
0.0063762	0.0553145	0.249095	0.310742	0.313556	0.0623723	4096	CSED	Normal	0.00633456	0.0552696	0.249071	0.31051	0.31384	0.0624287	0.00684615	0.0548216	0.245399	0.305992	0.320397	0.0640224
0.00637682	0.0554507	0.24967	0.311174	0.312731	0.0620463	4096	CSED	Normal	0.00632708	0.0554165	0.249658	0.311055	0.312952	0.0620394	0.00700826	0.0555992	0.248002	0.310392	0.315123	0.0613453
0.00641188	0.055221	0.24902	0.310475	0.313915	0.0624143	4096	CSED	Normal	0.00633351	0.0552139	0.248858	0.310306	0.314245	0.0625046	0.0070834	0.0544298	0.243098	0.303267	0.324794	0.0648212
0.00635432	0.0552656	0.249023	0.310833	0.313583	0.0624048	4096	CSED	Normal	0.00633001	0.0552395	0.249015	0.310591	0.313835	0.0624487	0.00661746	0.0537805	0.241966	0.303511	0.326488	0.0651474
0.00637801	0.0552533	0.248895	0.310626	0.313895	0.0624136	4096	CSED	Normal	0.00631482	0.0552427	0.248926	0.310391	0.314133	0.0624625	0.00680615	0.0543948	0.244457	0.305367	0.322315	0.0641584
0.00646676	0.0557509	0.249048	0.311724	0.31255	0.0618651	4096	CSED	Normal	0.00791429	0.0560568	0.247802	0.317528	0.307687	0.0604108	0.00643742	0.0557775	0.248957	0.311551	0.312763	0.0619176
0.00636735	0.0554816	0.249138	0.31172	0.31287	0.0618472	4096	CSED	Normal	0.00682498	0.0558196	0.248557	0.319053	0.306994	0.0602154	0.00636491	0.05548	0.248946	0.311582	0.313175	0.0618741
0.00638536	0.055409	0.249449	0.311174	0.313113	0.0619245	4096	CSEI	Anormal	0.00632176	0.0554493	0.249455	0.311305	0.313024	0.0618977	0.00670883	0.0554628	0.247856	0.312553	0.313766	0.0611282
0.00635089	0.0554419	0.249644	0.311105	0.313011	0.0618909	4096	CSEI	Normal	0.00632607	0.0555013	0.249726	0.311074	0.312923	0.0618897	0.00655147	0.0552148	0.248939	0.312883	0.312506	0.0613693
0.00586693	0.0507764	0.228483	0.314695	0.339296	0.0585269	4096	CSEI	Anormal	0.00584206	0.0510928	0.22989	0.313968	0.33817	0.0586701	0.00551031	0.0424596	0.191022	0.3404	0.361766	0.0567492
0.00633064	0.0548946	0.24713	0.314015	0.313412	0.0616828	4096	CSEI	Anormal	0.00629578	0.054994	0.247345	0.313819	0.313343	0.0616669	0.0064477	0.0525144	0.234585	0.326332	0.317177	0.0605159
0.00633142	0.0550147	0.247619	0.313917	0.312889	0.0617101	4096	CSEI	Normal	0.00626263	0.0550472	0.247892	0.313689	0.312853	0.0617402	0.00653006	0.0527262	0.236771	0.32773	0.31324	0.0605553
0.00635448	0.0554267	0.249699	0.311112	0.312871	0.0619807	4096	CSEI	Normal	0.00632698	0.055426	0.249735	0.311132	0.312835	0.0619926	0.00662433	0.0554337	0.248929	0.311357	0.314007	0.061121
0.00633762	0.0554435	0.249683	0.310997	0.313101	0.0618848	4096	CSEI	Normal	0.00632414	0.0554734	0.249668	0.310989	0.313056	0.0619388	0.00665807	0.0554229	0.248312	0.310945	0.315031	0.0610984
0.00634361	0.0554188	0.249535	0.31128	0.312937	0.0619414	4096	CSEI	Normal	0.00632629	0.0554842	0.24981	0.31109	0.312788	0.0619494	0.00648281	0.0559057	0.255022	0.312756	0.307482	0.0598252
0.00635065	0.0554156	0.249778	0.310897	0.313088	0.0619228	4096	CSEI	Normal	0.00633478	0.0554476	0.249792	0.31088	0.313059	0.061941	0.00692688	0.0559548	0.247515	0.310369	0.315659	0.0610396
0.0063743	0.0552974	0.249267	0.310932	0.313357	0.0622375	4096	CSEI	Normal	0.00640062	0.0553228	0.249368	0.310889	0.313243	0.0622363	0.00700718	0.0548669	0.246255	0.306546	0.319431	0.0633819
0.00635719	0.0554317	0.249675	0.31142	0.312549	0.0620214	4096	CSEI	Normal	0.00631858	0.0554615	0.249709	0.311329	0.312584	0.0620556	0.0068188	0.0559041	0.250699	0.312085	0.310742	0.0612067
0.00642776	0.0554384	0.249589	0.311434	0.312529	0.0620375	4096	CSEI	Normal	0.00632359	0.055435	0.249718	0.311285	0.312644	0.0620478	0.00727383	0.0556649	0.249719	0.311598	0.312094	0.0611136
0.0063447	0.0554636	0.24953	0.311357	0.312717	0.0620466	4096	CSEI	Anormal	0.00632898	0.0554097	0.249645	0.311238	0.312796	0.0620402	0.00703617	0.0562552	0.249823	0.311578	0.311783	0.0609873
0.0063785	0.0553855	0.24947	0.311411	0.3127	0.0621062	4096	CSEI	Normal	0.00630894	0.0554048	0.249429	0.311271	0.312879	0.0621676	0.00702916	0.057323	0.255222	0.311252	0.306539	0.0600722
0.00656817	0.0564626	0.253156	0.310671	0.3093	0.0612909	4096	CSEI	Normal	0.00630899	0.0560324	0.25177	0.31037	0.311231	0.0617415	0.0067233	0.0557338	0.251294	0.312835	0.309802	0.0610684
0.00641214	0.055414	0.249672	0.311366	0.312539	0.0620495	4096	CSEI	Anormal	0.00636969	0.0554416	0.249724	0.311186	0.312652	0.0620764	0.0067811	0.0551273	0.249417	0.311577	0.312954	0.0616047
0.00645983	0.0553769	0.249404	0.311077	0.313083	0.0620521	4096	CSEI	Anormal	0.00636045	0.0553667	0.249517	0.31095	0.313219	0.0620434	0.00706544	0.0548501	0.246599	0.307769	0.319864	0.061332
0.00636023	0.055358	0.249416	0.311237	0.313063	0.0620157	4096	CSEI	Normal	0.0063302	0.0554433	0.249588	0.311142	0.312937	0.062006	0.00685237	0.054819	0.245659	0.308376	0.320273	0.0615002
0.00640575	0.0553093	0.249187	0.310799	0.313391	0.0623683	4096	CSEI	Normal	0.00636796	0.0552977	0.249236	0.310635	0.313546	0.062373	0.00685495	0.0546257	0.245887	0.306491	0.319594	0.0640317
0.00639839	0.0553003	0.249106	0.310709	0.313557	0.062388	4096	CSEI	Normal	0.00632128	0.0552883	0.249124	0.310471	0.313771	0.0624752	0.00696799	0.0543511	0.244557	0.305014	0.321879	0.0647244
0.00634897	0.05542	0.249627	0.311374	0.312668	0.0620145	4096	CSEI	Normal	0.0063211	0.055441	0.24973	0.311178	0.312743	0.0620353	0.0068508	0.0555921	0.24891	0.311509	0.313249	0.0613523
0.00642565	0.0551799	0.248785	0.310377	0.314181	0.0625113	4096	CSEI	Normal	0.00635054	0.0551695	0.248672	0.310194	0.314476	0.0625989	0.00726338	0.0534493	0.240542	0.302756	0.328324	0.0651979
0.00643653	0.0553014	0.24911	0.310856	0.31341	0.0623449	4096	CSEI	Normal	0.00636522	0.0552966	0.249188	0.310686	0.313586	0.0623347	0.00685725	0.0546218	0.246121	0.307345	0.319004	0.0635386
0.00633295	0.0553001	0.249006	0.310706	0.313752	0.0623542	4096	CSEI	Normal	0.00629856	0.0552666	0.248992	0.310491	0.313985	0.0624304	0.00670593	0.0543225	0.245005	0.306669	0.321054	0.0637432
0.00640225	0.0557338	0.249054	0.3118	0.312535	0.0618974	4096	CSEI	Normal	0.00697511	0.0557284	0.248448	0.316027	0.309367	0.0608864	0.00642088	0.0558193	0.248919	0.311499	0.312821	0.0619364
0.0063787	0.0554502	0.249005	0.311789	0.312987	0.0618215	4096	CSEI	Normal	0.00705059	0.0557216	0.248094	0.318973	0.307351	0.0602623	0.00634971	0.055441	0.248822	0.311601	0.31336	0.0618551
0.00637325	0.0554262	0.249305	0.311193	0.31318	0.0619747	4096	CSID	Anormal	0.00631666	0.0554944	0.249518	0.311125	0.313058	0.0619381	0.0066676	0.0554699	0.247029	0.312113	0.315011	0.0611837
0.00639554	0.0553805	0.249294	0.310931	0.313455	0.0619941	4096	CSID	Normal	0.00634138	0.0554348	0.249451	0.310877	0.313355	0.061988	0.00680634	0.0551322	0.246223	0.309565	0.318161	0.0615862
0.00585994	0.0505352	0.227452	0.318237	0.337219	0.0583508	4096	CSID	Anormal	0.00582543	0.050829	0.228995	0.317409	0.336027	0.0585589	0.00563963	0.0430265	0.192477	0.345721	0.355312	0.0557228
0.00631585	0.0549112	0.247303	0.313862	0.313411	0.0616619	4096	CSID	Anormal	0.0062459	0.0549864	0.247521	0.313635	0.313353	0.0617219	0.00657956	0.0526792	0.234635	0.326938	0.316541	0.0601938
0.00629198	0.0550818	0.247998	0.313745	0.312599	0.0617441	4096	CSID	Normal	0.00629376	0.0551063	0.248108	0.313607	0.312603	0.0617451	0.00651101	0.0526951	0.23591	0.33062	0.312027	0.0597986
0.00635365	0.0554388	0.249706	0.311134	0.312904	0.0619176	4096	CSID	Normal	0.0063572	0.0555013	0.24971	0.311109	0.312843	0.06193	0.00668434	0.0555639	0.249153	0.310982	0.314031	0.0610574
0.00637357	0.0554457	0.24966	0.310863	0.313187	0.0619203	4096	CSID	Normal	0.00631773	0.0554618	0.249728	0.310905	0.313094	0.0619443	0.00676109	0.0552976	0.246049	0.310017	0.318715	0.0606471
0.00638153	0.0554737	0.249624	0.311199	0.312836	0.0619376	4096	CSID	Normal	0.00631389	0.0554503	0.249688	0.311089	0.312876	0.0620343	0.00678632	0.055568	0.247206	0.310623	0.316466	0.0608233
0.00634825	0.0554183	0.249657	0.310828	0.313299	0.0618914	4096	CSID	Normal	0.00634639	0.0554663	0.249704	0.310794	0.313205	0.0619332	0.00688464	0.0556482	0.247484	0.310068	0.31648	0.0609089
0.00635914	0.0554116	0.249689	0.311405	0.312518	0.0620726	4096	CSID	Normal	0.00633122	0.0554406	0.249791	0.311279	0.312526	0.0620904	0.00679346	0.0555744	0.249784	0.311445	0.312443	0.0614217
0.00637697	0.0554267	0.249637	0.311437	0.312526	0.0620522	4096	CSID	Normal	0.00631965	0.0554694	0.249733	0.311402	0.312507	0.0620278	0.00682972	0.0559385	0.250829	0.311862	0.310862	0.0611333
0.00644317	0.0554472	0.24958	0.311363	0.312586	0.0620379	4096	CSID	Normal	0.00640864	0.0554465	0.249678	0.311239	0.312648	0.0620353	0.00714859	0.0556959	0.249401	0.311604	0.312438	0.0611738
0.00635447	0.0554508	0.249639	0.311287	0.312683	0.0620384	4096	CSID	Anormal	0.00631906	0.0554212	0.249636	0.311156	0.312881	0.0620441	0.00710311	0.056429	0.248463	0.311515	0.313146	0.060819
0.00636682	0.0554018	0.249578	0.311417	0.31261	0.0620784	4096	CSID	Normal	0.00634039	0.0554234	0.249523	0.311267	0.312791	0.0621101	0.00801783	0.0581744	0.256364	0.310865	0.304643	0.0593484
0.00642523	0.0557532	0.250695	0.310987	0.311728	0.0618686	4096	CSID	Normal	0.00634417	0.0556407	0.250321	0.310662	0.312446	0.0620404	0.00726772	0.0566098	0.252921	0.312332	0.308164	0.0601554
0.00652383	0.0553495	0.249725	0.311348	0.312511	0.0620032	4096	CSID	Anormal	0.00642246	0.0553775	0.249717	0.311215	0.312691	0.0620384	0.00723927	0.0554396	0.249499	0.311245	0.312527	0.0614905
0.00641983	0.0553856	0.249498	0.311099	0.313023	0.062028	4096	CSID	Anormal	0.00632444	0.0554168	0.249453	0.311007	0.313263	0.0619938	0.00711731	0.0552712	0.246796	0.307598	0.319129	0.0615594
0.00638209	0.0553894	0.249463	0.3112	0.31303	0.0619896	4096	CSID	Normal	0.00630112	0.0554247	0.249685	0.311156	0.312864	0.0620187	0.00700264	0.0550176	0.247027	0.309016	0.317942	0.061468
0.00640088	0.0552969	0.249145	0.310688	0.313548	0.0623736	4096	CSID	Normal	0.00631769	0.0552768	0.249085	0.3104	0.313894	0.0624789	0.00693499	0.0545172	0.245109	0.304956	0.321606	0.064365
0.00645155	0.0553324	0.249158	0.310721	0.313444	0.0623484	4096	CSID	Normal	0.00638226	0.0553222	0.249062	0.310462	0.31381	0.0624192	0.00706573	0.0547296	0.24529	0.305936	0.320457	0.0639989
0.00635744	0.0554042	0.249604	0.31129	0.312719	0.0620788	4096	CSID	Normal	0.00633738	0.0554166	0.249747	0.311099	0.312837	0.0620084	0.0067944	0.0553447	0.248578	0.310903	0.314408	0.0614421
0.00636457	0.0552927	0.249089	0.310686	0.313634	0.0623922	4096	CSID	Normal	0.00634169	0.0552611	0.249024	0.310524	0.31388	0.0624258	0.00701513	0.0544523	0.244541	0.306194	0.321293	0.0639948
0.00633165	0.0552836	0.249021	0.310818	0.313628	0.0623773	4096	CSID	Normal	0.00629311	0.0552887	0.249079	0.31062	0.313771	0.0624073	0.00668249	0.0545129	0.245449	0.306775	0.320311	0.0637602
0.00635067	0.0552941	0.248993	0.31059	0.313856	0.0623732	4096	CSID	Normal	0.00630313	0.055237	0.24898	0.310378	0.314052	0.0625059	0.00674283	0.0542225	0.244563	0.305968	0.321898	0.0641128
0.00637098	0.0557323	0.24905	0.311759	0.312562	0.0619422	4096	CSID	Normal	0.00697854	0.0555275	0.247938	0.31695	0.309193	0.0608413	0.00640249	0.0558306	0.248792	0.311562	0.31289	0.0619293
0.0063611	0.0554364	0.249167	0.311593	0.313039	0.0618297	4096	CSID	Normal	0.00675805	0.0558312	0.248668	0.31857	0.307369	0.060262	0.00634868	0.05546	0.248952	0.31147	0.313331	0.0618607
0.00635789	0.0554675	0.249286	0.311405	0.313029	0.0618687	4096	CSIE	Normal	0.00677748	0.0557951	0.24809	0.319161	0.307384	0.060244	0.00633302	0.0552751	0.2487	0.311516	0.313687	0.0619286
0.0063838	0.0554237	0.249347	0.311208	0.313169	0.0619237	4096	CSII	Anormal	0.00634444	0.0554493	0.249485	0.311106	0.313125	0.061944	0.00683217	0.055104	0.245414	0.312591	0.316515	0.061031
0.00634868	0.0553873	0.249405	0.310857	0.31351	0.061942	4096	CSII	Normal	0.00631372	0.0554281	0.249506	0.310839	0.313417	0.0619463	0.00690738	0.0549297	0.245592	0.310061	0.318679	0.0613093
0.00588138	0.0510076	0.229786	0.313998	0.338226	0.0587412	4096	CSII	Anormal	0.00587324	0.0513054	0.23105	0.313303	0.337252	0.05884	0.00548625	0.0436719	0.196357	0.338526	0.357252	0.0565899
0.00631818	0.054941	0.247328	0.313855	0.313322	0.0617071	4096	CSII	Anormal	0.00628091	0.0550255	0.247674	0.313563	0.313194	0.0617306	0.00645381	0.0524981	0.234689	0.327068	0.316517	0.0603415
0.0063041	0.0550051	0.247659	0.313861	0.312905	0.0617305	4096	CSII	Normal	0.00627889	0.0550155	0.247803	0.313679	0.312961	0.0617215	0.00643919	0.052327	0.235192	0.328749	0.3143	0.0605308
0.00635255	0.0554744	0.249655	0.311123	0.312872	0.0619771	4096	CSII	Normal	0.00632068	0.055475	0.249731	0.311148	0.312808	0.0619727	0.00661606	0.0554391	0.248901	0.311291	0.314095	0.0611255
0.00633794	0.0554496	0.249684	0.310898	0.313182	0.0618959	4096	CSII	Normal	0.00630535	0.0554767	0.249704	0.310877	0.31317	0.0619164	0.00672246	0.0554953	0.248266	0.310928	0.315092	0.0609673
0.00628777	0.0554172	0.24964	0.311286	0.312819	0.0619991	4096	CSII	Normal	0.00630975	0.0554643	0.249794	0.311158	0.312739	0.0619813	0.00647071	0.0540545	0.247376	0.313595	0.314376	0.0616139
0.00635834	0.055444	0.249699	0.310915	0.313134	0.061895	4096	CSII	Normal	0.0063416	0.0554693	0.249741	0.310835	0.313111	0.0619482	0.00691606	0.0555632	0.248391	0.310585	0.314981	0.0610323
0.00633781	0.0552959	0.249328	0.310919	0.313298	0.0622792	4096	CSII	Normal	0.00632219	0.0553364	0.249447	0.310836	0.313257	0.0622585	0.00677686	0.0549507	0.247013	0.307788	0.317999	0.0629586
0.00635109	0.0554563	0.249589	0.311425	0.312588	0.0620472	4096	CSII	Normal	0.00631577	0.055435	0.249742	0.31139	0.312524	0.0620463	0.00682548	0.0558103	0.250253	0.311677	0.311548	0.0613462
0.00633876	0.0554088	0.249601	0.311452	0.312598	0.0620532	4096	CSII	Normal	0.00630149	0.0554408	0.24968	0.311346	0.31261	0.0620767	0.00689505	0.0556505	0.250079	0.311897	0.311645	0.0612896
0.00634555	0.0554331	0.249644	0.311339	0.312648	0.0620399	4096	CSII	Anormal	0.00633777	0.0554175	0.249721	0.311133	0.312797	0.0620532	0.00710061	0.0563554	0.249762	0.31155	0.311689	0.061004
0.00638356	0.0554551	0.249575	0.311162	0.312756	0.0621276	4096	CSII	Normal	0.00631457	0.0553861	0.249389	0.310931	0.313192	0.0622457	0.00702057	0.0568835	0.254339	0.311718	0.307148	0.0603354
0.00636623	0.056388	0.252953	0.310391	0.309967	0.061381	4096	CSII	Normal	0.00631252	0.0562993	0.252481	0.309942	0.310757	0.0616564	0.00688691	0.0521778	0.23573	0.292771	0.34129	0.0686681
0.0064073	0.0553994	0.249669	0.311389	0.31255	0.0620389	4096	CSII	Anormal	0.00636585	0.0554323	0.249821	0.311235	0.312538	0.0620576	0.00681659	0.0551064	0.249407	0.311618	0.312949	0.0615649
0.00635784	0.0553674	0.249483	0.311128	0.313097	0.0620165	4096	CSII	Anormal	0.00631642	0.0553925	0.249392	0.310944	0.313376	0.0620351	0.00687181	0.0545698	0.245626	0.307601	0.321268	0.0615461
0.00634411	0.0553903	0.249513	0.311282	0.312912	0.0620097	4096	CSII	Normal	0.00630306	0.055427	0.249731	0.311271	0.312723	0.0619982	0.00684144	0.0552787	0.248223	0.310705	0.315192	0.0612296
0.00634468	0.0553405	0.249267	0.310832	0.313338	0.0623318	4096	CSII	Normal	0.00631285	0.0553111	0.249251	0.310652	0.313539	0.0623942	0.00681183	0.0547869	0.246412	0.307819	0.318157	0.0634955
0.00637684	0.0553273	0.249098	0.310724	0.313576	0.0623517	4096	CSII	Normal	0.00631052	0.0552687	0.249092	0.310531	0.313802	0.0624457	0.00679157	0.0547153	0.246186	0.307117	0.318988	0.0636873
0.00636065	0.0554124	0.249645	0.311303	0.312703	0.062026	4096	CSII	Normal	0.00631368	0.0554354	0.24972	0.311254	0.312724	0.0620023	0.00679048	0.0554274	0.248805	0.311233	0.313809	0.0613981
0.00634643	0.0552444	0.248899	0.310636	0.313887	0.0624462	4096	CSII	Normal	0.00630241	0.0552359	0.248838	0.310402	0.314143	0.0625403	0.00676446	0.0538706	0.242925	0.305021	0.324167	0.064761
0.00637893	0.0552914	0.249074	0.310828	0.313523	0.0623652	4096	CSII	Normal	0.00633043	0.0552903	0.249069	0.310652	0.31375	0.0623672	0.00675869	0.05449	0.245591	0.306994	0.319998	0.0636642
0.00635492	0.0552477	0.249102	0.310711	0.313729	0.062317	4096	CSII	Normal	0.00629318	0.0552743	0.249037	0.310588	0.313884	0.0623831	0.00673779	0.0543012	0.245197	0.306838	0.320894	0.0635303
0.0063988	0.055733	0.24913	0.311696	0.312574	0.0618924	4096	CSII	Normal	0.00701191	0.0556486	0.248337	0.315969	0.309525	0.0609509	0.00642245	0.0557637	0.24893	0.311541	0.312821	0.0619445
0.00641132	0.0554597	0.248914	0.311782	0.313038	0.0618278	4096	CSII	Normal	0.0068259	0.0553973	0.247408	0.319808	0.307734	0.0602976	0.00633611	0.0554828	0.248693	0.31169	0.31338	0.0618497
0.00638196	0.0554261	0.249038	0.311828	0.312933	0.0618189	4096	CSII	Normal	0.00695914	0.0553835	0.247072	0.321267	0.306713	0.0600692	0.00635062	0.055437	0.248825	0.311663	0.313331	0.0618149
ch2: 0-1kHz	ch2: 1-10kHz	ch2: 10-50kHz	ch2: 50-100kHz	ch2: 100-150kHz	ch2: 150-160kHz		quadrant	class	ch0: 0-1kHz	ch0: 1-10kHz	ch0: 10-50kHz	ch0: 50-100kHz	ch0: 100-150kHz	ch0: 150-160kHz	ch1: 0-1kHz	ch1: 1-10kHz	ch1: 10-50kHz	ch1: 50-100kHz	ch1: 100-150kHz	ch1: 150-160kHz
